# Supplementary material for: Single-cell genomics reveal low recombination frequencies in freshwater bacteria of the SAR11 clade
Source: PubMed Central journal article supplement (PMC4053759; doi:10.1186/gb-2013-14-11-r130), 2013-11-28

## Supplementary Table S1

### SAG assembly and annotation data

| cell                                                                             | D10                                                                                                                                                       | C07                                                                                                                                    | J10                                                                                                                                                                                                  | L09                                   | P20                                             | L15                                                                                                                                                                                                         | B11                                     | M09                                   | N17                                   | C06                                                              |
|----------------------------------------------------------------------------------|-----------------------------------------------------------------------------------------------------------------------------------------------------------|----------------------------------------------------------------------------------------------------------------------------------------|------------------------------------------------------------------------------------------------------------------------------------------------------------------------------------------------------|---------------------------------------|-------------------------------------------------|-------------------------------------------------------------------------------------------------------------------------------------------------------------------------------------------------------------|-----------------------------------------|---------------------------------------|---------------------------------------|------------------------------------------------------------------|
| Lake                                                                             | Mendota                                                                                                                                                   | Mendota                                                                                                                                | Mendota                                                                                                                                                                                              | Sparkling                             | Damariscotta                                    | Mendota                                                                                                                                                                                                     | Damariscotta                            | Damariscotta                          | Sparkling                             | Damariscotta                                                     |
| Collected (2009)                                                                 | May 19                                                                                                                                                    | May 19                                                                                                                                 | May 19                                                                                                                                                                                               | May 28                                | Aug 19                                          | May 19                                                                                                                                                                                                      | Aug 19                                  | Aug 19                                | May 28                                | Aug 19                                                           |
| IMG name                                                                         | alpha proteobacterium SCGC AAA028-D10                                                                                                                     | alpha proteobacterium SCGC AAA028-C07                                                                                                  | alpha proteobacterium SCGC AAA027-J10                                                                                                                                                                | alpha proteobacterium SCGC AAA023-L09 | alpha proteobacterium SCGC AAA280-P20           | alpha proteobacterium SCGC AAA027-L15                                                                                                                                                                       | alpha proteobacterium SCGC AAA280-B11   | alpha proteobacterium SCGC AAA487-M09 | alpha proteobacterium SCGC AAA024-N17 | alpha proteobacterium SCGC AAA027-C06                            |
| Assembly size bp                                                                 | 925,141                                                                                                                                                   | 846,566                                                                                                                                | 792,980                                                                                                                                                                                              | 774,923                               | 720,523                                         | 719,587                                                                                                                                                                                                     | 674,250                                 | 627,365                               | 328,144                               | 775,384                                                          |
| Scaffolds                                                                        | 57                                                                                                                                                        | 32                                                                                                                                     | 82                                                                                                                                                                                                   | 76                                    | 65                                              | 56                                                                                                                                                                                                          | 47                                      | 97                                    | 45                                    | 90                                                               |
| Genes                                                                            | 1091                                                                                                                                                      | 974                                                                                                                                    | 952                                                                                                                                                                                                  | 921                                   | 838                                             | 840                                                                                                                                                                                                         | 815                                     | 800                                   | 397                                   | 936                                                              |
| Proteins                                                                         | 1057                                                                                                                                                      | 955                                                                                                                                    | 921                                                                                                                                                                                                  | 892                                   | 814                                             | 821                                                                                                                                                                                                         | 797                                     | 776                                   | 383                                   | 916                                                              |
| rRNA genes <sup>a</sup>                                                          | 5,16,23S                                                                                                                                                  | 5S                                                                                                                                     | 5,16,23S                                                                                                                                                                                             | 5S, 23S, 23S, 23S                     | 5,16,23S                                        | -                                                                                                                                                                                                           | 5,16,23S                                | -                                     | 5S,5S, 16S,23S                        | 16S, 23S,23S                                                     |
| Largest scaffolds bp (GC)                                                        | 176,148 (0.29)<br>145,420 (0.29)<br>126,387 (0.29)<br>103,388 (0.31)                                                                                      | 203,146 (0.29)<br>138,806 (0.30)                                                                                                       | 96,767 (0.30)<br>91,089 (0.31)<br>69,426 (0.29)<br>52,972 (0.31)                                                                                                                                     | 59,964 (0.29)<br>54,879 (0.32)        | 90,870 (0.30)<br>48,602 (0.31)<br>48,167 (0.28) | 245,217 (0.30)<br>126,188 (0.28)<br>88,810 (0.29)<br>79,072 (0.30)                                                                                                                                          | 54,526 (0.28)<br>53,946 (0.31)          | 54,427 (0.28)<br>54,274 (0.29)        | 35,260 (0.28)<br>29,946 (0.30)        | 70,157 (0.30)<br>65,619 (0.29)<br>64,320 (0.29)<br>52,346 (0.29) |
| microcluster                                                                     | A                                                                                                                                                         |                                                                                                                                        | B                                                                                                                                                                                                    | A                                     | C                                               | B                                                                                                                                                                                                           |                                         | C                                     | A                                     | B                                                                |
| Patchwork construction (patchwork start-end): scaffold: start - end: orientation | (1-42082)sc<br>5:21559-63640:1<br>(693535-695310)s<br>c6:17015-18790:-1<br>(944309-963781)s<br>c4:72945-92417:-1<br>(967411-1035006)<br>sc4:1309-68904:-1 | (120287-138346)sc<br>c2:68210-86269:1<br>(470765-525902)s<br>c1:45082-<br>-<br>100219:1<br>(555014-569229)s<br>c1:13443-9-<br>148654:1 | (223342-227654)s<br>c1:62601-66913:1<br>(705898-723218)s<br>c12:3330-20650:1<br>(827988-862604)s<br>c6:5222-39838:1<br>(879880-944308)s<br>c2:16613-81041:-1<br>(963782-967410)s<br>c18:4512-8140:-1 | (862605-879879)s<br>c7:17273-34547:1  | (785837-827987)s<br>c1:15416-57566:1            | (42083-120286)s<br>c4:237-78440:1<br>(138347-223341)s<br>c3:2869-87863:1<br>(227655-470764)s<br>c1:85-243194:1<br>(525903-555013)s<br>c5:10515-39625:-1<br>(569230-693534)s<br>c2:1153-125457:1<br>(695311- | (1035007-1054073)sc<br>5:16867-35933:-1 | (753541-760945)s<br>c1:14137-21541:-1 |                                       |                                                                  |

|  |  |  |  |  |  |                                                                                                                                  |  |  |  |  |
|--|--|--|--|--|--|----------------------------------------------------------------------------------------------------------------------------------|--|--|--|--|
|  |  |  |  |  |  | 705897)s<br>c8:671-<br>11257:-1<br>(723219-<br>753540)s<br>c6:10247<br>-40568:-1<br>(760946-<br>785836)s<br>c7:1714-<br>26604:-1 |  |  |  |  |
|--|--|--|--|--|--|----------------------------------------------------------------------------------------------------------------------------------|--|--|--|--|

<sup>a</sup> Multiple annotations indicate partial genes located on different contigs

## Supplementary Table S2

Sequences included in the analysis with ClonalFrame

| Block     | Position in patchwork genome <sup>a</sup> | Gene name            |
|-----------|-------------------------------------------|----------------------|
| 1         | 108973..110196                            | coaBC                |
| 2-1       | 110196..110636                            | dut                  |
| 2-2       | 110643..111395                            | moeB                 |
| 3         | 111392..111871                            | 485 <sup>b</sup>     |
| 4-1       | 111943..112449                            | fabA                 |
| 4-2       | 112459..113673                            | fabB                 |
| 5         | 113684..114463                            | fabI                 |
| 6 & 7-1   | c(114460..116535)                         | pnp                  |
| 7-2       | c(116542..116811)                         | rpsO                 |
| 8         | c(116815..117693)                         | truB                 |
| 9-1       | c(117686..118063)                         | rbfA                 |
| 9-2       | c(118070..120286)                         | infB                 |
| 10        | 143515..144288                            | dapB                 |
| 11        | 144318..144956                            | nth                  |
| 12        | c(145907..146539)                         | 11939 <sup>b</sup>   |
| 13 & 14   | 150239..152770                            | leuS                 |
| 15        | 152760..153224                            | 23820 <sup>b</sup>   |
| 16-1      | 153230..154252                            | <sup>b</sup>         |
| 16-2      | c(154211..155077)                         | parB                 |
| 17-1      | c(155078..155878)                         | parA                 |
| 17-2      | c(155887..156516)                         | gidB                 |
| 18        | c(156522..158390)                         | gidA                 |
| 19        | c(158438..159763)                         | trmE                 |
| 20-1      | c(309116..310042)                         | acuC                 |
| 20-2      | c(310039..311199)                         | dapE                 |
| 21        | 347456..348757                            | 11936 <sup>b</sup>   |
| 22        | 348771..349685                            | OG11893 <sup>b</sup> |
| 23        | c(350465..351775)                         | OG11892 <sup>b</sup> |
| 24-1      | 503872..504540                            | 23783 <sup>b</sup>   |
| 24-2 & 25 | 504544..505776                            | OG11235 <sup>b</sup> |
| 26        | 507641..509677                            | ligA                 |

<sup>a</sup> Numbers listed give full-length gene position in the patchwork genome, from which gaps were removed by Gblocks as described in Methods. To obtain position in SAGs find these positions in patchwork construction from SAGs (Supplementary Table S5), for example *coaBC* matches scaffold 4 from cell L15.

<sup>b</sup> Genes without a gene name were not used for the sequence divergence test.

**Supplementary Table S3**

Number of SAGs for each of the 57 proteins used in the concatenated protein alignment.

|      |   |
|------|---|
| aspS | 6 |
| ftsQ | 0 |
| gidA | 9 |
| glyS | 7 |
| hypA | 6 |
| hypB | 8 |
| hypC | 6 |
| hypD | 6 |
| hypE | 9 |
| hypF | 6 |
| hypG | 5 |
| hypH | 6 |
| ksgA | 7 |
| ligA | 9 |
| nusA | 9 |
| nusB | 6 |
| obgE | 5 |
| pcnB | 9 |
| pheT | 6 |
| pnp  | 9 |
| pth  | 8 |
| recR | 6 |
| rnc  | 4 |
| rplA | 4 |
| rplI | 6 |
| rplJ | 4 |
| rplK | 4 |
| rplL | 3 |
| rplM | 4 |
| rplO | 4 |
| rplQ | 7 |
| rplR | 4 |
| rplS | 7 |
| rplU | 5 |
| rplY | 8 |
| rpmA | 4 |
| rpmE | 6 |
| rpmI | 6 |

|      |   |
|------|---|
| rpoA | 7 |
| rpoB | 5 |
| rpsB | 8 |
| rpsD | 4 |
| rpsE | 4 |
| rpsH | 5 |
| rpsI | 4 |
| rpsK | 4 |
| rpsN | 5 |
| rpsO | 9 |
| rpsP | 7 |
| rpsT | 8 |
| rrf  | 8 |
| secY | 6 |
| serS | 7 |
| smpB | 4 |
| thdF | 9 |
| tig  | 5 |
| trmD | 7 |
| tsf  | 8 |

**Supplementary Table S4**

Protein clusters putatively gained in gene flux analyses with penalties for gain ranging from 2 to 5.

| <b>Cluster</b> | <b>G</b> | <b>A</b> | <b>I</b> | <b>N</b> | <b>Gene</b>                            | <b>Product</b>                                                                                                                                                                                       |
|----------------|----------|----------|----------|----------|----------------------------------------|------------------------------------------------------------------------------------------------------------------------------------------------------------------------------------------------------|
| LDA01479       | 1        | 0        | 0        | 0        | NA                                     | hypothetical:19, rubrerythrin:9, transmembrane:1                                                                                                                                                     |
| LDA01850       | 1        | 0        | 0        | 0        | livG:3                                 | ABC:16, branched-chain:5, ABC-type:2, amino:1, branched:1, high-affinity:1                                                                                                                           |
| LDA01890       | 1        | 0        | 0        | 0        | livG:1                                 | ABC:17, branched-chain:5, inner-membrane:1, branched:1, glutelin:1, high-affinity:1                                                                                                                  |
| LDA02108       | 1        | 0        | 0        | 0        | NA                                     | hypothetical:11, transporter:2, inner:2, conserved:1, transmembrane:1                                                                                                                                |
| LDA02119       | 1        | 0        | 0        | 0        | mntH:4                                 | manganese:20, Mn <sup>2+</sup> /Fe <sup>2+</sup> :2, manganese/divalent:1                                                                                                                            |
| LDA02133       | 1        | 0        | 0        | 0        | NA                                     | ABC:8, nitrate/sulfonate/bicarbonate:4, NMT1/THI5-like:3, extracellular:2, sulfonate/nitrate:1, amino:1, putative:1, substrate-binding:1, taurine-binding:1                                          |
| LDA02178       | 1        | 0        | 0        | 0        | ansA:2                                 | L-asparaginase:12, hypothetical:7                                                                                                                                                                    |
| LDA02194       | 1        | 0        | 0        | 0        | NA                                     | UDP-glucose/GDP-mannose:12, UDP-glucose:2, udpglucosegdpmannose:1, putative:1, nucleotide:1, UDP-N-acetyl-D-mannosaminuronic:1, UDP-N-acetyl-D-mannosaminuronate:1, nucleotide-sugar:1, udpglucose:1 |
| LDA02200       | 1        | 0        | 0        | 0        | NA                                     | ABC:18, amino:1, ABC-transport:1, taurine:1                                                                                                                                                          |
| LDA02201       | 1        | 0        | 0        | 0        | NA                                     | ABC:10, binding-protein-dependent:7, binding-protein:2, amino:1, taurine:1                                                                                                                           |
| LDA02298       | 1        | 0        | 0        | 0        | dppA:3, dppA <sub>ch</sub> :1, dppA1:1 | extracellular:7, periplasmic:4, dipeptide:3, peptide:3, 4-phytase:2, ABC:1, hypothetical:1, peptide/opine/nickel:1                                                                                   |
| LDA02381       | 1        | 0        | 0        | 0        | gatA1:1, gatA:1                        | amidase:17, amidotransferase:1, glutamyl-tRNA(Gln):1                                                                                                                                                 |
| LDA02391       | 1        | 0        | 0        | 0        | NA                                     | hypothetical:10, membrane-associated:2, sulfatase:2, phosphatidylethanolamine:Kdo2-lipid:1                                                                                                           |
| LDA02440       | 1        | 0        | 0        | 0        | rffE:4                                 | UDP-N-acetylglucosamine:18, lipopolysaccharide:1, putative:1, UDP-GlcNAc-2-epimerase:1, udp-n-acetylglucosamine:1                                                                                    |
| LDA02514       | 1        | 0        | 0        | 0        | dctQ:3                                 | tripartite:9, TRAP:4, TRAP-type:1                                                                                                                                                                    |
| LDA02517       | 1        | 0        | 0        | 0        | NA                                     | hypothetical:12, signal:1, MtN3:1                                                                                                                                                                    |
| LDA02611       | 1        | 0        | 0        | 0        | NA                                     | branched-chain:4, extracellular:3, ABC:2, twin-arginine:2, ABC-type:2, amino:1, Leu/Ile/Val-binding:1, branched:1, leucine-specific:1                                                                |
| LDA02738       | 1        | 0        | 0        | 0        | NA                                     | hypothetical:12                                                                                                                                                                                      |
| LDA02740       | 1        | 0        | 0        | 0        | hsdR:7                                 | type:7, Type:6, HsdR:4, putative:2, DEAD/DEAH:1                                                                                                                                                      |
| LDA02798       | 1        | 0        | 0        | 0        | NA                                     | hypothetical:12, lipoprotein:2, signal:1                                                                                                                                                             |
| LDA02823       | 1        | 0        | 0        | 0        | gltJ:4, gltJ1:1, gltJ2:1               | amino:8, glutamate/aspartate:4, polar:3, ABC:2                                                                                                                                                       |
| LDA02925       | 1        | 0        | 0        | 0        | NA                                     | oxidoreductase:6, Gfo/Idh/MocA:4, oxidoreductase-like:3, NAD-binding:1, hypothetical:1, trans-1,2-dihydrobenzene-1,2-diol:1                                                                          |
| LDA03005       | 1        | 0        | 0        | 0        | NA                                     | hypothetical:14, DMT:3                                                                                                                                                                               |
| LDA03006       | 1        | 0        | 0        | 0        | NA                                     | hypothetical:5, branched-chain:3, branched:2, putative:1, leucine-,:1, Fis:1                                                                                                                         |

TSA4

|          |   |   |   |   |                                  |                                                                                                                        |
|----------|---|---|---|---|----------------------------------|------------------------------------------------------------------------------------------------------------------------|
| LDA03008 | 1 | 0 | 0 | 0 | NA                               | inner-membrane:12, branched:2, ABC:1, branched-chain:1, transmembrane:1                                                |
| LDA03124 | 1 | 0 | 0 | 0 | gltK:2, gltK2:1, gtpC:1, gltK1:1 | polar:5, glutamate/aspartate:4, ABC:3, amino:3                                                                         |
| LDA03154 | 1 | 0 | 0 | 0 | NA                               | hypothetical:14, signal:1                                                                                              |
| LDA03268 | 1 | 0 | 0 | 0 | NA                               | hypothetical:13, TRAP-T:1, transmembrane:1                                                                             |
| LDA03313 | 1 | 0 | 0 | 0 | NA                               | molybdopterin:6, sulfite:4, twin-arginine:2, oxidase:1, oxidoreductase.:1                                              |
| LDA03330 | 1 | 0 | 0 | 0 | NA                               | hypothetical:9, transmembrane:1                                                                                        |
| LDA03331 | 1 | 0 | 0 | 0 | fer2:1                           | ferredoxin.:4, ferredoxin-like:2, (2Fe-2S):2, ferredoxin:2                                                             |
| LDA03501 | 1 | 0 | 0 | 0 | NA                               | glycosyl:11, glycosyltransferase:3, dolichol-p-glucose:1                                                               |
| LDA03547 | 1 | 0 | 0 | 0 | NA                               | hypothetical:12, integral:1                                                                                            |
| LDA03637 | 1 | 0 | 0 | 0 | adh:1                            | alcohol:9, zinc-containing:1, zinc-type:1                                                                              |
| LDA03718 | 1 | 1 | 0 | 0 | pldA:1                           | phospholipase:5, hypothetical:4, cardiolipin:2, phosphatidylserine/phosphatidylglycerophosphate/:1, nuclease-related:1 |
| LDA03823 | 1 | 0 | 0 | 0 | rci:1                            | phage:5, integrase:2, DNA:2, Phage:1, integrase/recombinase:1, site-specific:1, shufflon-specific:1                    |
| LDA03889 | 1 | 0 | 0 | 0 | NA                               | glycosyl:4, group:4, glycosyltransferase:2, putative:1                                                                 |
| LDA03891 | 1 | 0 | 0 | 0 | NA                               | spore:5, hypothetical:2, late-developmental:1, protein:1                                                               |
| LDA03906 | 1 | 1 | 0 | 0 | bcpB:1                           | thiol-specific:2, BcpB:2, redoxin:1, thioredoxin:1                                                                     |
| LDA04129 | 1 | 0 | 0 | 0 | gltL:4, gltL1:1, gltL2:1         | glutamate/aspartate:4, ABC:3, glutamate:2, amino:1                                                                     |
| LDA04183 | 1 | 0 | 0 | 0 | lpeA:1                           | methyltransferase:4, hypothetical:4, putative:2, lipopolysaccharide:1, SAM-dependent:1                                 |
| LDA04204 | 1 | 1 | 0 | 0 | NA                               | hypothetical:11                                                                                                        |
| LDA04259 | 1 | 0 | 0 | 0 | NA                               | hypothetical:7, membrane:1                                                                                             |
| LDA04351 | 1 | 0 | 0 | 0 | traF:4                           | hypothetical:6, F:2, conjugative:2, TraF-like:1                                                                        |
| LDA04391 | 1 | 1 | 0 | 0 | braC:1, braC1:1, livJ:1          | extracellular:3, ABC:1, amino:1, solute-binding:1, putative:1, leucine-:,1, Leu/Ile/Val-binding:1, branched-chain:1    |
| LDA04406 | 1 | 0 | 0 | 0 | fimD:1                           | hypothetical:4, P:3, outer:1, fimbrial:1                                                                               |
| LDA04536 | 1 | 0 | 0 | 0 | chrR:1                           | hypothetical:3, transcription:2, anti-sigm:1, allophanate:1, anti-ECFsigma:1                                           |
| LDA04774 | 1 | 0 | 0 | 0 | NA                               | major:8                                                                                                                |
| LDA04805 | 1 | 1 | 0 | 0 | NA                               | hypothetical:3                                                                                                         |
| LDA04976 | 1 | 1 | 0 | 0 | NA                               | methyltransferase:4, hypothetical:3, putative:2                                                                        |
| LDA05211 | 1 | 1 | 1 | 0 | NA                               | hypothetical:8, acetamidase/formamidase:1                                                                              |
| LDA05213 | 1 | 0 | 0 | 0 | traH:2                           | pilus:3, F:2, hypothetical:2, TraH:2                                                                                   |
| LDA05222 | 1 | 0 | 0 | 0 | NA                               | 6-phosphofructokinase:5, pyrophosphate-dependent:1                                                                     |
| LDA05230 | 1 | 0 | 0 | 0 | NA                               | group:4, glycosyl:2, glycosyltransferase-like:1, hypothetical:1, glycosyltransferase:1                                 |
| LDA05245 | 1 | 0 | 0 | 0 | corAf:1                          | magnesium:2, metal:2, metal-transport:2, transmembrane:1, CorA-like:1, magnesium/cobalt:1                              |
| LDA05607 | 1 | 1 | 0 | 0 | NA                               | hypothetical:2, putative:1, putative:1, Pilus:1, chaperone:1                                                           |
| LDA05671 | 1 | 1 | 1 | 1 | NA                               | NA                                                                                                                     |
| LDA05745 | 1 | 0 | 0 | 0 | NA                               | hypothetical:6                                                                                                         |
| LDA05815 | 1 | 0 | 0 | 0 | lpsB1:1                          | sugar:3, putative:1, galactosyltransferase:1, hypothetical:1, glycosyltransferase:1                                    |



TS4

|          |   |   |   |   |    |                                                                                                                  |
|----------|---|---|---|---|----|------------------------------------------------------------------------------------------------------------------|
| LDA06129 | 1 | 0 | 0 | 0 | NA | hypothetical:4, TPR:2, serine/threonine:1                                                                        |
| LDA06319 | 1 | 1 | 1 | 1 | NA | NA                                                                                                               |
| LDA06338 | 1 | 1 | 0 | 0 | NA | glycosyltransferase:3, glycosyl:1, group:1, alpha-glycosyltransferase:1                                          |
| LDA06377 | 1 | 1 | 1 | 1 | NA | NA                                                                                                               |
| LDA06381 | 1 | 1 | 1 | 1 | NA | NA                                                                                                               |
| LDA06386 | 1 | 1 | 1 | 1 | NA | NA                                                                                                               |
| LDA06387 | 1 | 1 | 1 | 0 | NA | hypothetical:4                                                                                                   |
| LDA06397 | 1 | 1 | 1 | 0 | NA | epimerase:2, dTDP-glucose:1, NAD-dependent:1, hypothetical:1, epimerase/dehydratase:1, NDP-glucose:1             |
| LDA06398 | 1 | 1 | 0 | 0 | NA | hypothetical:1                                                                                                   |
| LDA06704 | 1 | 0 | 0 | 0 | NA | thioredoxin:4, thioredoxin-related:1, hypothetical:1, thioredoxin-like:1                                         |
| LDA06830 | 1 | 0 | 0 | 0 | NA | acetaldehyde:6                                                                                                   |
| LDA06989 | 1 | 0 | 0 | 0 | NA | cephalosporin:3, hypothetical:3                                                                                  |
| LDA07069 | 1 | 0 | 0 | 0 | NA | hypothetical:6                                                                                                   |
| LDA07073 | 1 | 0 | 0 | 0 | NA | acid:3, nonspecific:1, Acid:1, PA-phosphatase-like:1                                                             |
| LDA07079 | 1 | 0 | 0 | 0 | NA | hypothetical:5                                                                                                   |
| LDA07083 | 1 | 1 | 1 | 1 | NA | NA                                                                                                               |
| LDA07085 | 1 | 1 | 0 | 0 | NA | extracellular:3, ABC:2, twin-arginine:1                                                                          |
| LDA07086 | 1 | 1 | 1 | 1 | NA | NA                                                                                                               |
| LDA07088 | 1 | 1 | 1 | 1 | NA | NA                                                                                                               |
| LDA07119 | 1 | 1 | 0 | 0 | NA | group:4, hypothetical:1, glycosyltransferase:1                                                                   |
| LDA07273 | 1 | 1 | 1 | 1 | NA | NA                                                                                                               |
| LDA07274 | 1 | 1 | 1 | 1 | NA | NA                                                                                                               |
| LDA07275 | 1 | 1 | 1 | 1 | NA | NA                                                                                                               |
| LDA07279 | 1 | 1 | 1 | 1 | NA | NA                                                                                                               |
| LDA07280 | 1 | 1 | 1 | 1 | NA | NA                                                                                                               |
| LDA07283 | 1 | 1 | 1 | 1 | NA | NA                                                                                                               |
| LDA07477 | 1 | 1 | 1 | 1 | NA | NA                                                                                                               |
| LDA07478 | 1 | 1 | 1 | 0 | NA | hypothetical:6                                                                                                   |
| LDA07527 | 1 | 1 | 0 | 0 | NA | hypothetical:6                                                                                                   |
| LDA07627 | 1 | 1 | 0 | 0 | NA | hypothetical:3, dienelactone:1, dipeptidyl:1                                                                     |
| LDA07689 | 1 | 0 | 0 | 0 | NA | hypothetical:3, tetratricopeptide:2                                                                              |
| LDA07691 | 1 | 0 | 0 | 0 | NA | 4-hydroxy-2-ketovalerate:4, pyruvate:1                                                                           |
| LDA07958 | 1 | 0 | 0 | 0 | NA | FkbM:3, methyltransferase:1                                                                                      |
| LDA08012 | 1 | 1 | 1 | 1 | NA | NA                                                                                                               |
| LDA08016 | 1 | 1 | 1 | 0 | NA | hypothetical:2                                                                                                   |
| LDA08020 | 1 | 1 | 1 | 1 | NA | NA                                                                                                               |
| LDA08107 | 1 | 1 | 0 | 0 | NA | hypothetical:5                                                                                                   |
| LDA08179 | 1 | 1 | 1 | 1 | NA | NA                                                                                                               |
| LDA08180 | 1 | 1 | 1 | 1 | NA | NA                                                                                                               |
| LDA08183 | 1 | 1 | 0 | 0 | NA | S-adenosyl-L-methionine-dependent:1, hypothetical:1, 2-polyprenyl-3-methyl-5-hydroxy-6-methoxy-1,4-:1, Generic:1 |
| LDA08184 | 1 | 1 | 1 | 0 | NA | putative:2, signal:1                                                                                             |
| LDA08185 | 1 | 1 | 1 | 1 | NA | NA                                                                                                               |
| LDA08186 | 1 | 1 | 1 | 1 | NA | NA                                                                                                               |
| LDA08189 | 1 | 1 | 1 | 1 | NA | NA                                                                                                               |
| LDA08191 | 1 | 1 | 1 | 1 | NA | NA                                                                                                               |
| LDA08375 | 1 | 1 | 1 | 1 | NA | hypothetical:5                                                                                                   |
| LDA08421 | 1 | 0 | 0 | 0 | NA | sialic:1, polysaccharide:1, N-acylneuraminate-9-phosphate:1                                                      |
| LDA08484 | 1 | 1 | 1 | 1 | NA | NA                                                                                                               |
| LDA08537 | 1 | 1 | 1 | 1 | NA | hypothetical:5                                                                                                   |
| LDA08588 | 1 | 1 | 0 | 0 | NA | DNA:3, hypothetical:1, adenine-specific:1                                                                        |
| LDA08738 | 1 | 1 | 1 | 1 | NA | NA                                                                                                               |

TS4

|          |   |   |   |   |    |                                       |
|----------|---|---|---|---|----|---------------------------------------|
| LDA09008 | 1 | 1 | 1 | 0 | NA | ABC:3, binding-protein-dependent:1    |
| LDA09104 | 1 | 1 | 1 | 0 | NA | TRAP:4                                |
| LDA09128 | 1 | 1 | 1 | 1 | NA | NA                                    |
| LDA09129 | 1 | 1 | 1 | 1 | NA | NA                                    |
| LDA09130 | 1 | 1 | 1 | 1 | NA | NA                                    |
| LDA09133 | 1 | 1 | 1 | 1 | NA | NA                                    |
| LDA09134 | 1 | 1 | 1 | 1 | NA | NA                                    |
| LDA09135 | 1 | 1 | 0 | 0 | NA | YceI:3                                |
| LDA09270 | 1 | 1 | 1 | 1 | NA | NA                                    |
| LDA09273 | 1 | 1 | 1 | 1 | NA | NA                                    |
| LDA09274 | 1 | 1 | 1 | 1 | NA | NA                                    |
| LDA09275 | 1 | 1 | 1 | 1 | NA | NA                                    |
| LDA09276 | 1 | 1 | 1 | 1 | NA | NA                                    |
| LDA09277 | 1 | 1 | 1 | 1 | NA | NA                                    |
| LDA09278 | 1 | 1 | 1 | 1 | NA | NA                                    |
| LDA09280 | 1 | 1 | 1 | 1 | NA | NA                                    |
| LDA09318 | 1 | 0 | 0 | 0 | NA | SAM-dependent:2, type:2               |
| LDA09577 | 1 | 1 | 1 | 1 | NA | NA                                    |
| LDA09691 | 1 | 1 | 1 | 1 | NA | NA                                    |
| LDA09965 | 1 | 1 | 1 | 0 | NA | hypothetical:3                        |
| LDA09996 | 1 | 0 | 0 | 0 | NA | NAD-dependent:4                       |
| LDA10041 | 1 | 1 | 0 | 0 | NA | hypothetical:2, O-methyltransferase:1 |
| LDA10190 | 1 | 1 | 1 | 1 | NA | hypothetical:2, capsule:1             |
| LDA10552 | 1 | 1 | 1 | 1 | NA | NA                                    |
| LDA10557 | 1 | 1 | 1 | 1 | NA | NA                                    |
| LDA10562 | 1 | 1 | 1 | 1 | NA | NA                                    |
| LDA10583 | 1 | 1 | 1 | 1 | NA | NA                                    |
| LDA10610 | 1 | 0 | 0 | 0 | NA | NAD-dependent:1                       |
| LDA10694 | 1 | 1 | 1 | 1 | NA | NA                                    |
| LDA10696 | 1 | 1 | 1 | 1 | NA | NA                                    |
| LDA10714 | 1 | 1 | 1 | 1 | NA | hypothetical:2, FkbM:1                |
| LDA11154 | 1 | 1 | 1 | 1 | NA | NA                                    |
| LDA11155 | 1 | 1 | 1 | 1 | NA | NA                                    |
| LDA11157 | 1 | 1 | 1 | 1 | NA | hemolysin:1                           |
| LDA11159 | 1 | 1 | 1 | 1 | NA | NA                                    |
| LDA11483 | 1 | 1 | 1 | 0 | NA | abortive:2                            |
| LDA11795 | 1 | 1 | 1 | 1 | NA | NA                                    |
| LDA12080 | 1 | 1 | 1 | 1 | NA | NA                                    |
| LDA12227 | 1 | 1 | 1 | 1 | NA | hypothetical:1                        |
| LDA12497 | 1 | 1 | 0 | 0 | NA | glycosyltransferase:1                 |
| LDA12538 | 1 | 1 | 1 | 1 | NA | NA                                    |
| LDA12541 | 1 | 1 | 1 | 1 | NA | NA                                    |
| LDA12542 | 1 | 1 | 1 | 0 | NA | cytochrome:1                          |
| LDA12547 | 1 | 1 | 1 | 1 | NA | NA                                    |
| LDA12549 | 1 | 1 | 1 | 1 | NA | MOSC:1, hypothetical:1                |
| LDA12559 | 1 | 1 | 1 | 0 | NA | formate:2                             |
| LDA12573 | 1 | 1 | 1 | 0 | NA | lipopolysaccharide:1                  |
| LDA12594 | 1 | 1 | 1 | 1 | NA | NA                                    |
| LDA12695 | 1 | 1 | 1 | 1 | NA | NA                                    |
| LDA12696 | 1 | 1 | 1 | 1 | NA | NA                                    |
| LDA12697 | 1 | 1 | 1 | 1 | NA | NA                                    |
| LDA12698 | 1 | 1 | 1 | 1 | NA | NA                                    |
| LDA13213 | 1 | 1 | 0 | 0 | NA | hypothetical:2                        |

TS4

|          |   |   |   |   |    |                                              |
|----------|---|---|---|---|----|----------------------------------------------|
| LDA13215 | 1 | 1 | 1 | 1 | NA | NA                                           |
| LDA13216 | 1 | 1 | 1 | 1 | NA | NA                                           |
| LDA13241 | 1 | 1 | 1 | 1 | NA | regulatory:1, nitrogen:1                     |
| LDA13406 | 1 | 1 | 1 | 1 | NA | short-chain:2                                |
| LDA13536 | 1 | 1 | 1 | 1 | NA | NA                                           |
| LDA13652 | 1 | 1 | 1 | 1 | NA | NA                                           |
| LDA13653 | 1 | 1 | 1 | 0 | NA | TRAP:1                                       |
| LDA13654 | 1 | 1 | 0 | 0 | NA | hypothetical:1, glycosyl/methyltransferase:1 |
| LDA13656 | 1 | 1 | 1 | 1 | NA | NA                                           |
| LDA13859 | 1 | 1 | 1 | 1 | NA | hypothetical:1                               |
| LDA13860 | 1 | 1 | 1 | 1 | NA | hypothetical:1                               |
| LDA13861 | 1 | 1 | 1 | 1 | NA | hypothetical:1                               |
| LDA13862 | 1 | 1 | 1 | 1 | NA | serine:1                                     |
| LDA14385 | 1 | 1 | 1 | 1 | NA | NA                                           |
| LDA14386 | 1 | 1 | 1 | 1 | NA | NA                                           |
| LDA14387 | 1 | 1 | 1 | 1 | NA | NA                                           |
| LDA14388 | 1 | 1 | 1 | 1 | NA | NA                                           |
| LDA14389 | 1 | 1 | 1 | 1 | NA | NA                                           |
| LDA14390 | 1 | 1 | 1 | 1 | NA | NA                                           |
| LDA14391 | 1 | 1 | 0 | 0 | NA | putative:1, secreted:1                       |
| LDA15221 | 1 | 1 | 1 | 1 | NA | NA                                           |
| LDA15349 | 1 | 1 | 1 | 1 | NA | NA                                           |
| LDA15785 | 1 | 1 | 1 | 1 | NA | NA                                           |
| LDA16072 | 1 | 1 | 1 | 1 | NA | NA                                           |
| LDA16073 | 1 | 1 | 1 | 1 | NA | NA                                           |
| LDA16074 | 1 | 1 | 1 | 1 | NA | NA                                           |
| LDA16076 | 1 | 1 | 1 | 1 | NA | NA                                           |
| LDA16078 | 1 | 1 | 1 | 1 | NA | NA                                           |
| LDA16080 | 1 | 1 | 1 | 1 | NA | NA                                           |
| LDA16082 | 1 | 1 | 1 | 1 | NA | NA                                           |
| LDA16085 | 1 | 1 | 1 | 1 | NA | NA                                           |
| LDA16089 | 1 | 1 | 1 | 1 | NA | NA                                           |
| LDA16090 | 1 | 1 | 1 | 1 | NA | NA                                           |
| LDA16202 | 1 | 1 | 1 | 1 | NA | methyltransferase:1                          |
| LDA16205 | 1 | 1 | 1 | 1 | NA | oxidoreductase:1                             |
| LDA16206 | 1 | 1 | 1 | 1 | NA | NA                                           |
| LDA16207 | 1 | 1 | 1 | 1 | NA | NA                                           |
| LDA16208 | 1 | 1 | 1 | 1 | NA | NA                                           |
| LDA16220 | 1 | 1 | 1 | 1 | NA | hypothetical:1                               |
| LDA16337 | 1 | 1 | 1 | 0 | NA | cyclase:1                                    |
| LDA16612 | 1 | 1 | 1 | 1 | NA | NA                                           |
| LDA16613 | 1 | 1 | 1 | 1 | NA | NA                                           |
| LDA16614 | 1 | 1 | 1 | 1 | NA | NA                                           |
| LDA16615 | 1 | 1 | 1 | 1 | NA | NA                                           |
| LDA16616 | 1 | 1 | 1 | 1 | NA | NA                                           |
| LDA16617 | 1 | 1 | 1 | 1 | NA | NA                                           |
| LDA16618 | 1 | 1 | 1 | 1 | NA | NA                                           |
| LDA16619 | 1 | 1 | 1 | 1 | NA | glycosyl:1                                   |
| LDA16620 | 1 | 1 | 1 | 1 | NA | NA                                           |
| LDA16621 | 1 | 1 | 1 | 1 | NA | NA                                           |
| LDA16622 | 1 | 1 | 1 | 1 | NA | NA                                           |
| LDA16623 | 1 | 1 | 1 | 1 | NA | NA                                           |
| LDA16625 | 1 | 1 | 1 | 1 | NA | NA                                           |

TS4

|          |   |   |   |   |        |                                               |
|----------|---|---|---|---|--------|-----------------------------------------------|
| LDA16626 | 1 | 1 | 1 | 1 | NA     | RNA:1                                         |
| LDA16627 | 1 | 1 | 1 | 1 | NA     | NA                                            |
| LDA17123 | 1 | 1 | 1 | 0 | NA     | dTDP-4-keto-6-deoxy-L-hexose2,3-dehydratase:1 |
| LDA17125 | 1 | 1 | 1 | 1 | NA     | NA                                            |
| LDA17258 | 1 | 1 | 1 | 0 | NA     | GTP-binding:1                                 |
| LDA17511 | 1 | 1 | 1 | 1 | NA     | NA                                            |
| LDA17512 | 1 | 1 | 1 | 1 | NA     | NA                                            |
| LDA17513 | 1 | 1 | 1 | 1 | NA     | L-aspartate:1                                 |
| LDA17514 | 1 | 1 | 1 | 1 | NA     | NA                                            |
| LDA17848 | 1 | 1 | 1 | 1 | NA     | hypothetical:1                                |
| LDA18477 | 1 | 1 | 1 | 1 | NA     | NA                                            |
| LDA18478 | 1 | 1 | 1 | 1 | NA     | NA                                            |
| LDA18479 | 1 | 1 | 1 | 1 | NA     | NA                                            |
| LDA18480 | 1 | 1 | 1 | 1 | NA     | NA                                            |
| LDA18481 | 1 | 1 | 1 | 1 | NA     | NA                                            |
| LDA18709 | 1 | 1 | 1 | 1 | NA     | type:1                                        |
| LDA18710 | 1 | 1 | 1 | 1 | NA     | NA                                            |
| LDA19180 | 1 | 1 | 1 | 1 | iolD:1 | malonic:1                                     |
| LDA20189 | 1 | 1 | 1 | 1 | NA     | NA                                            |
| LDA20190 | 1 | 1 | 1 | 1 | NA     | NA                                            |
| LDA20192 | 1 | 1 | 1 | 1 | NA     | NA                                            |
| LDA20451 | 1 | 1 | 1 | 0 | NA     | hypothetical:1                                |

**Total  
number of  
gains**      238 174 152 134

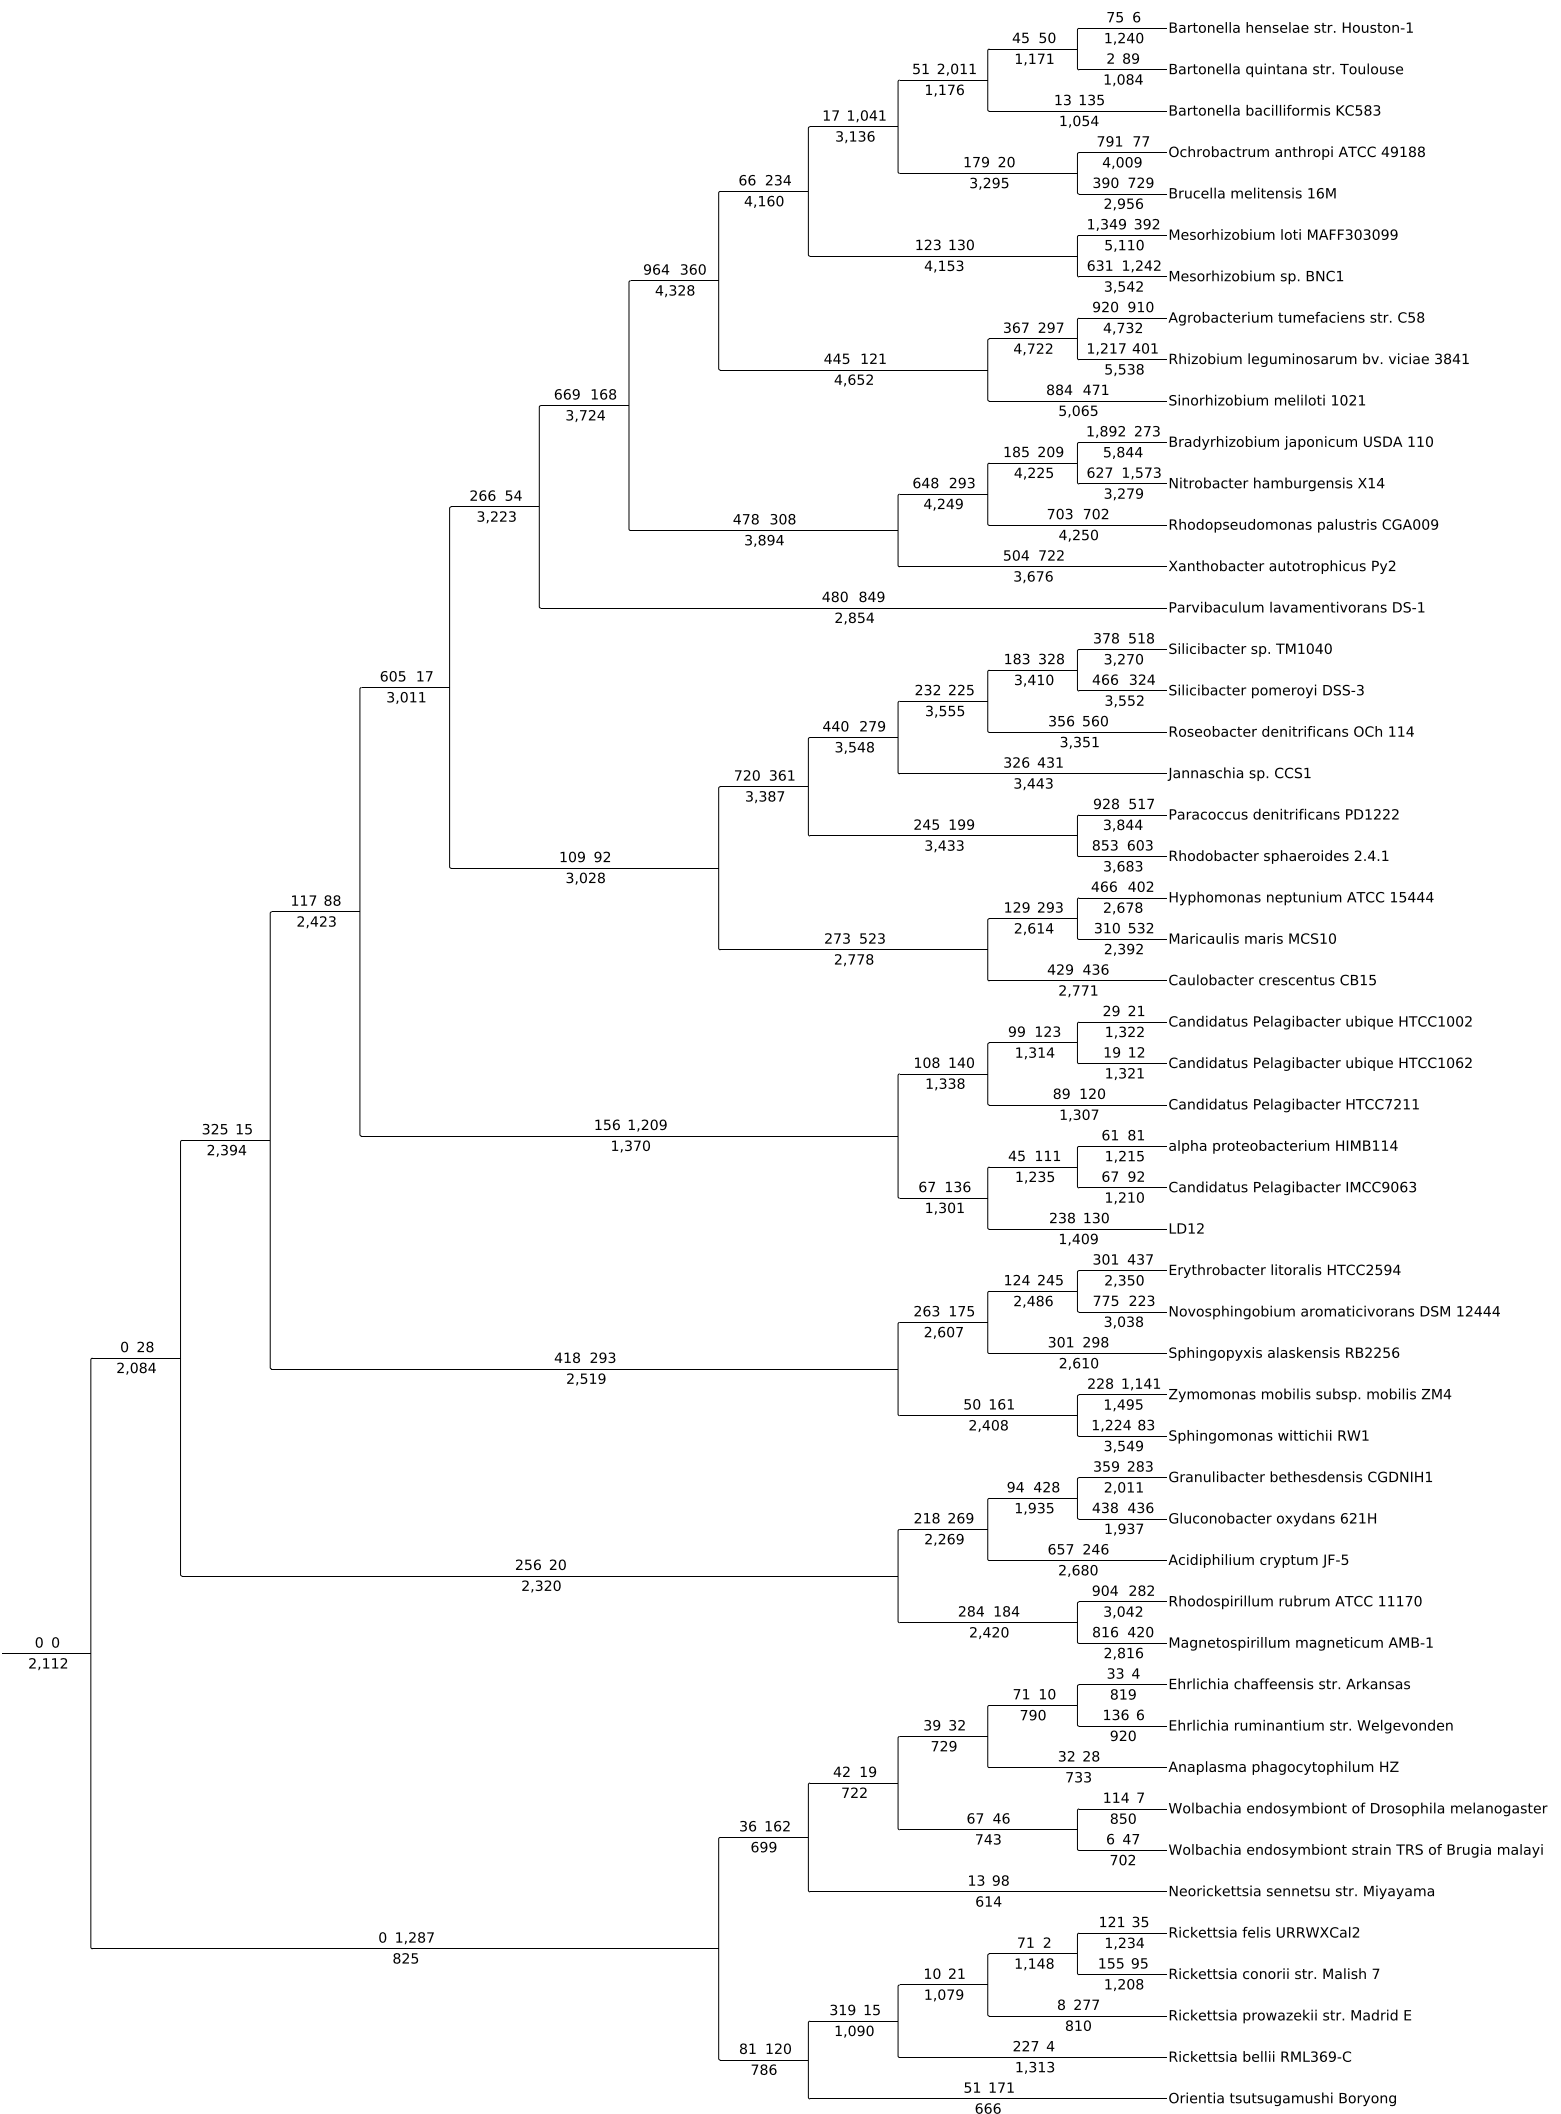

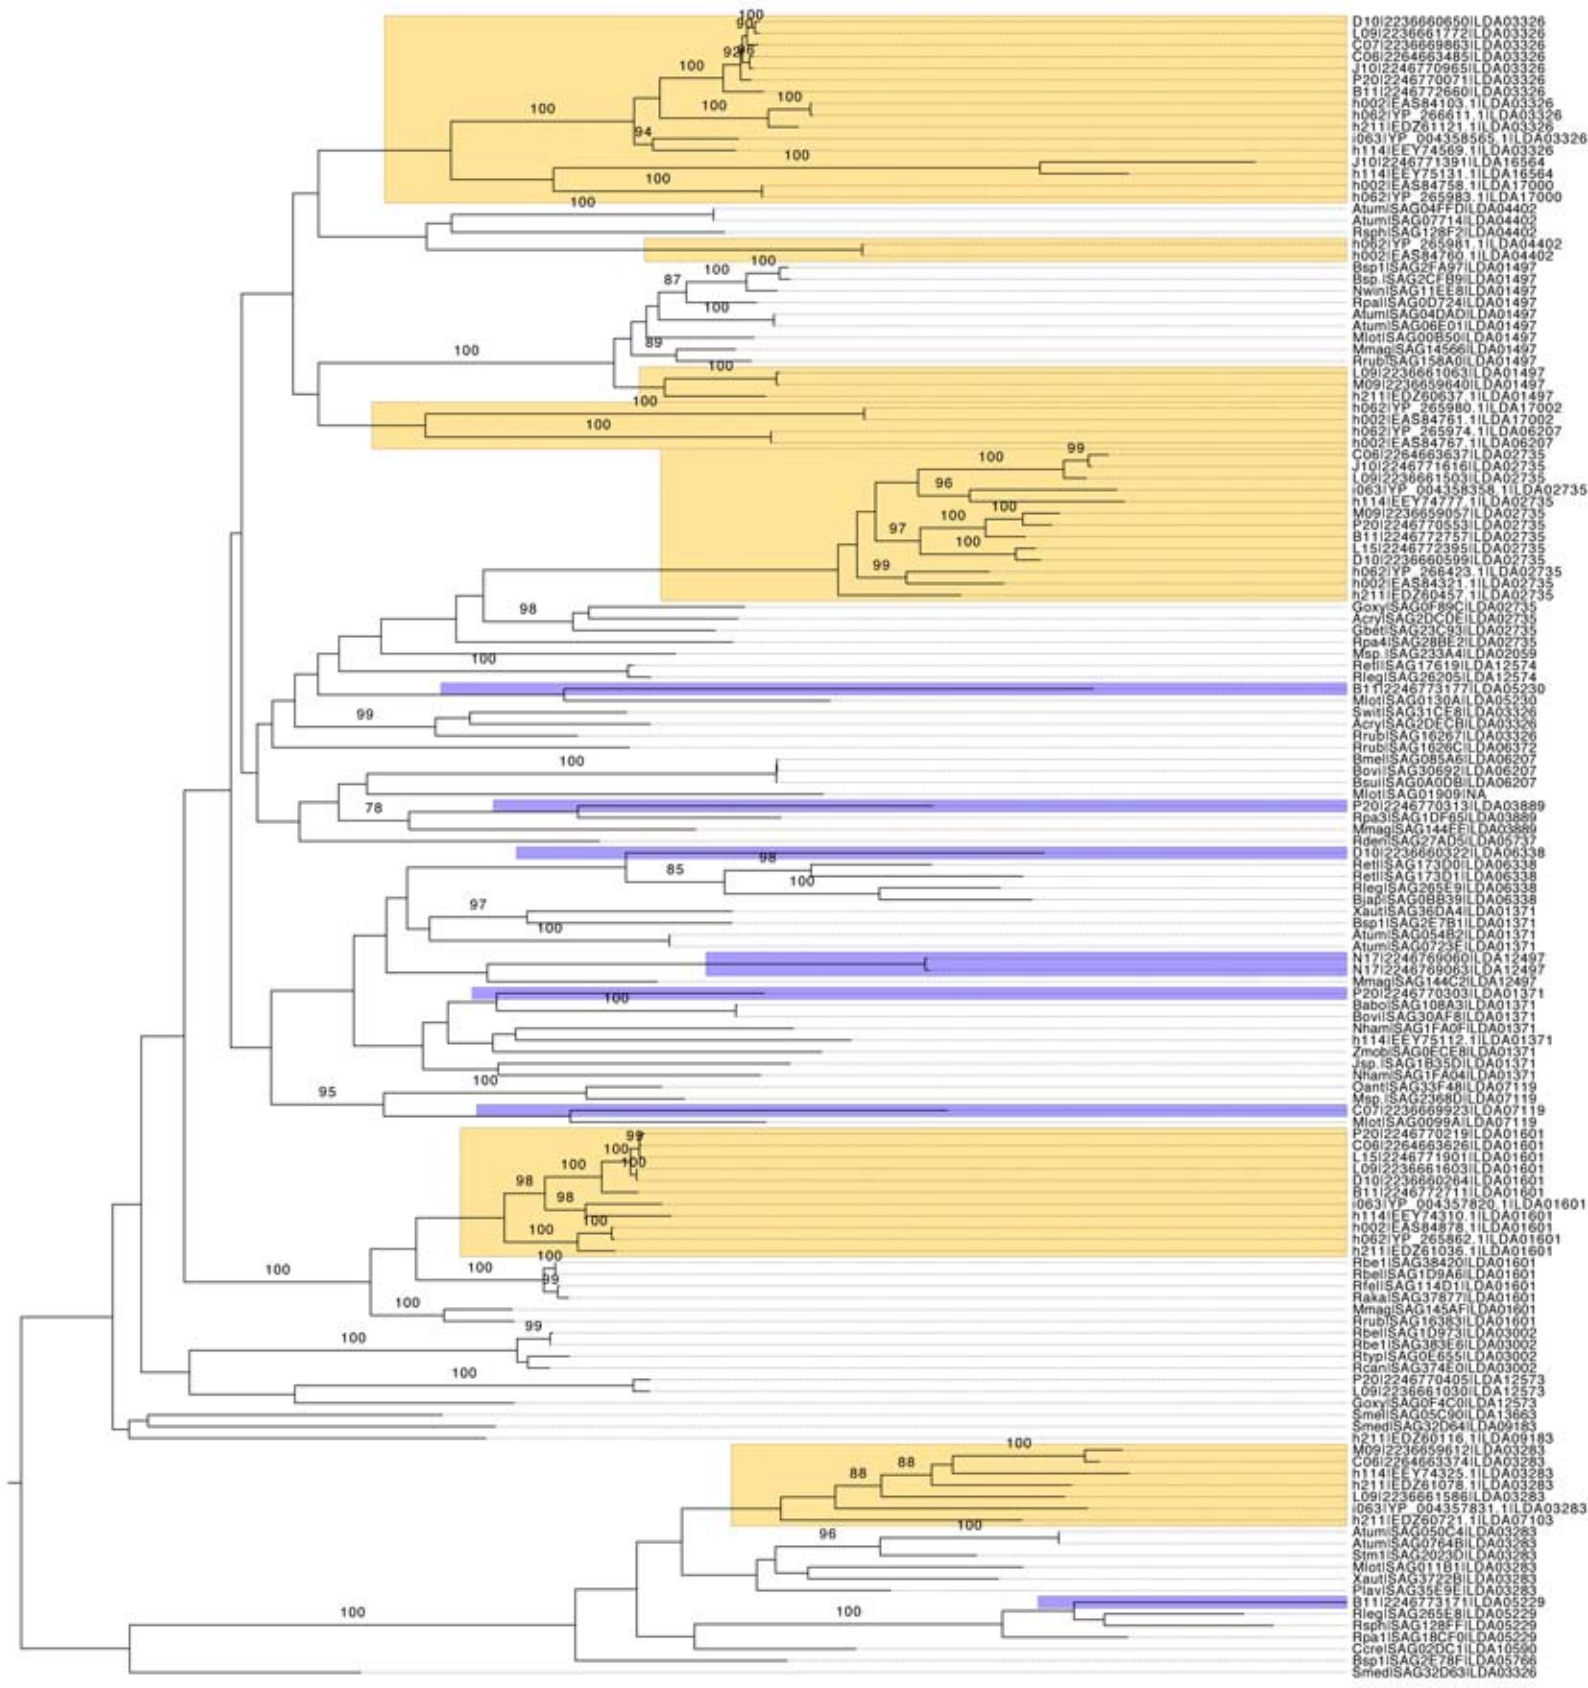

0.5

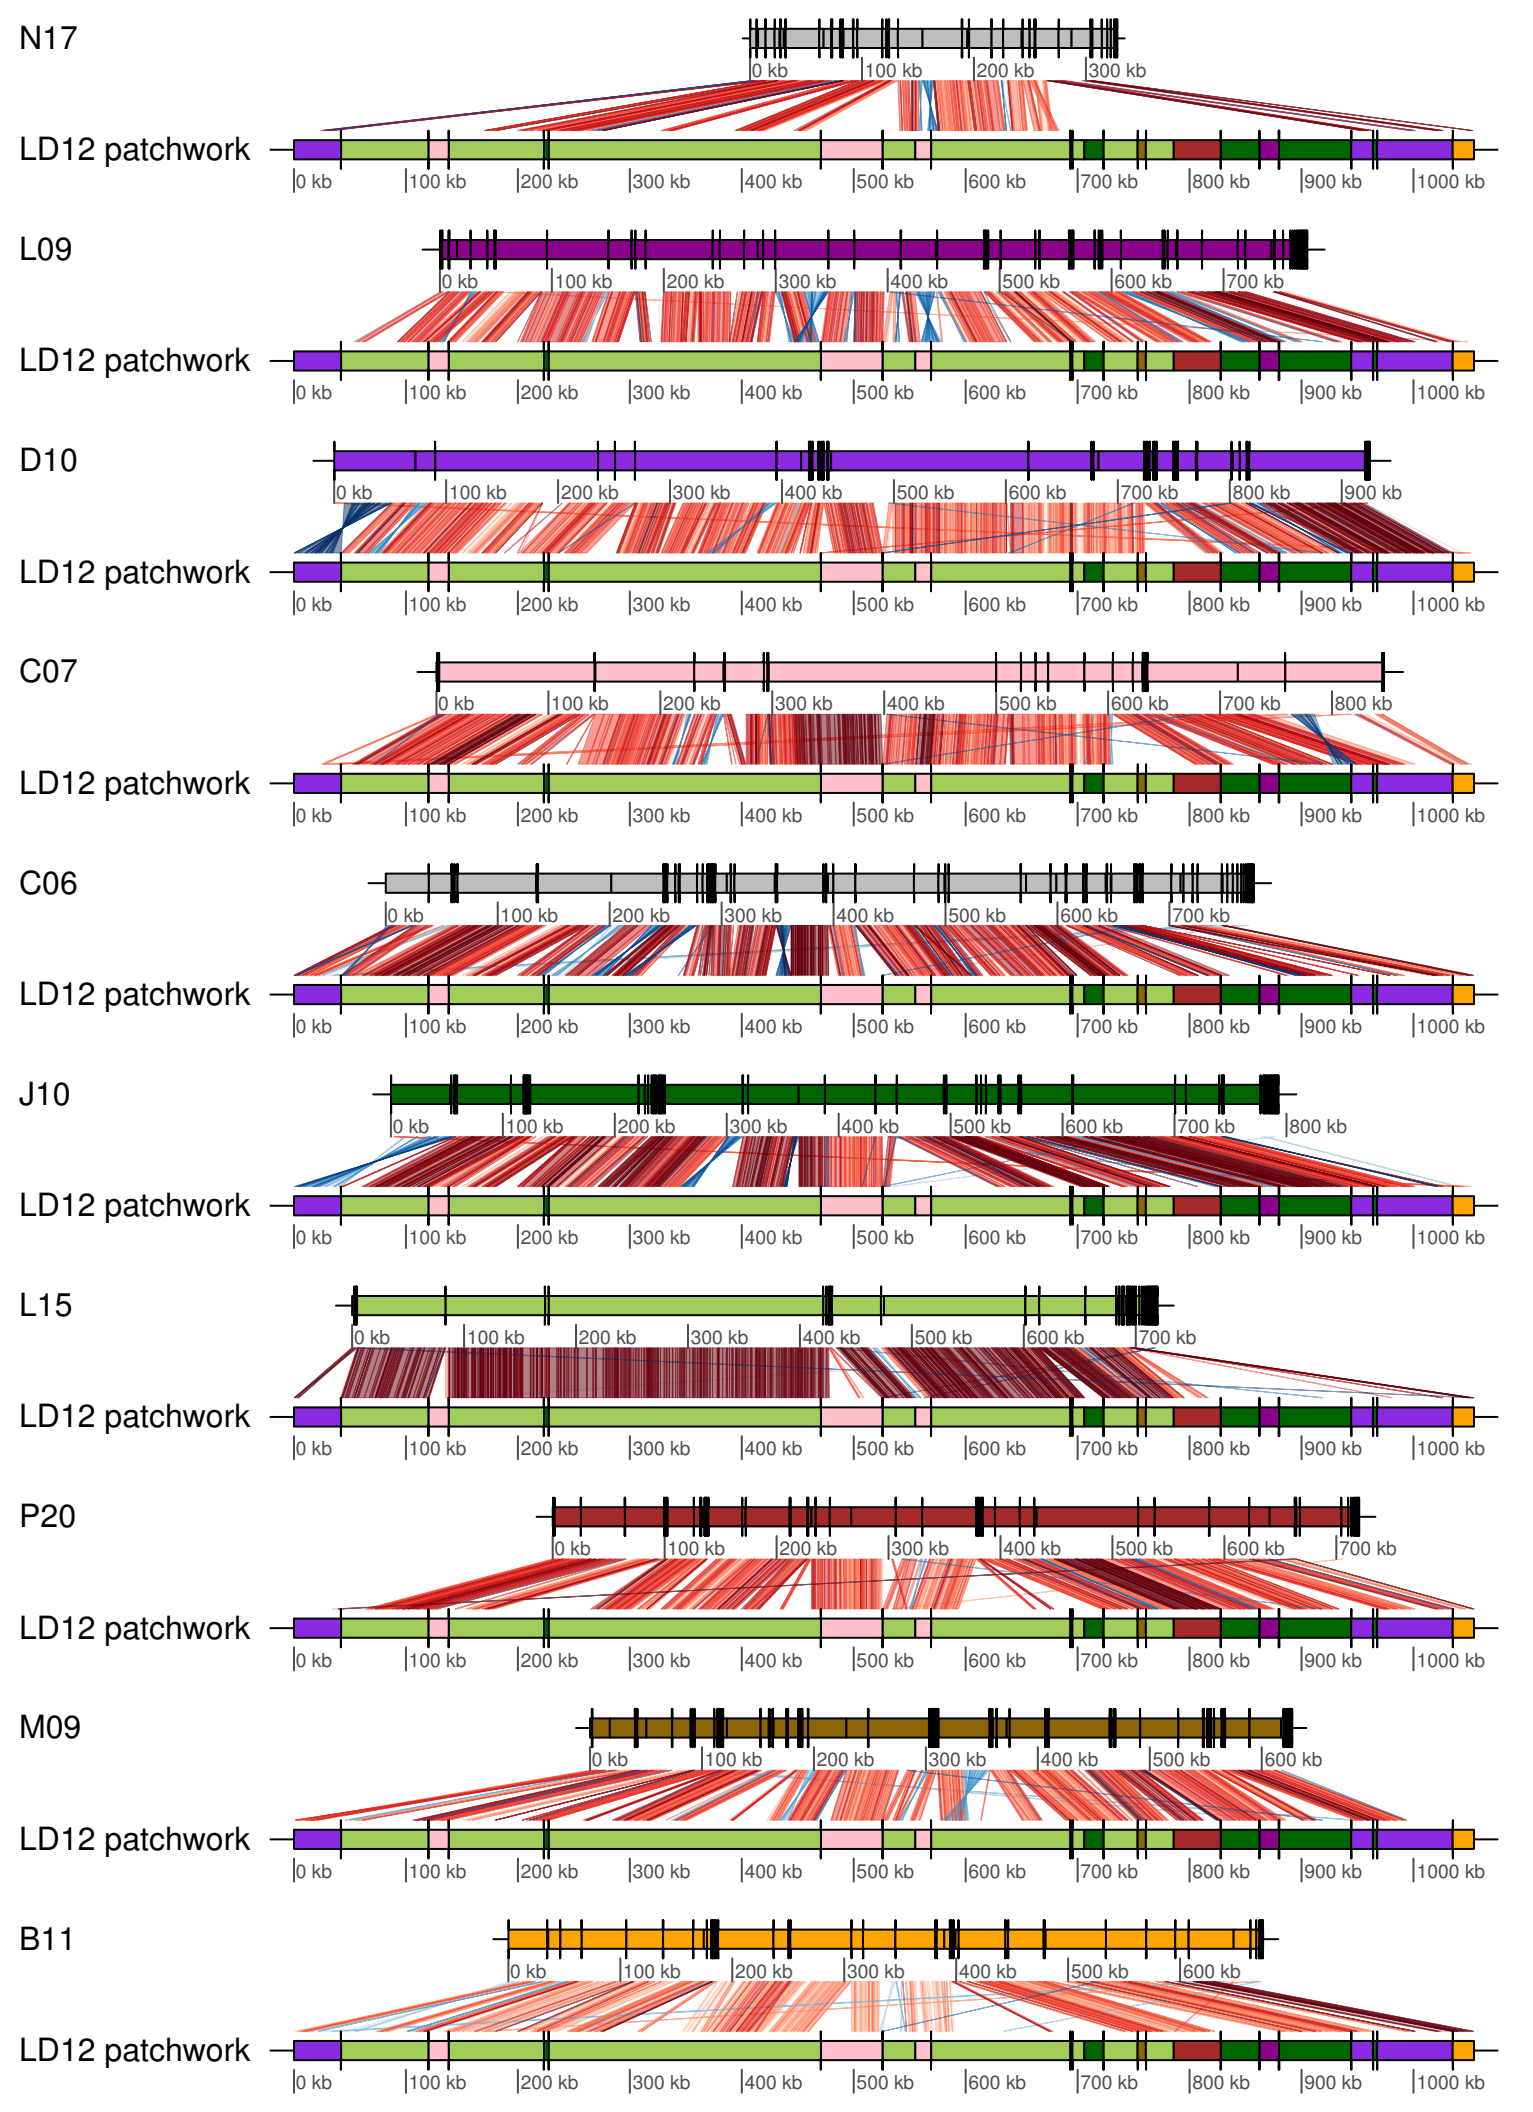

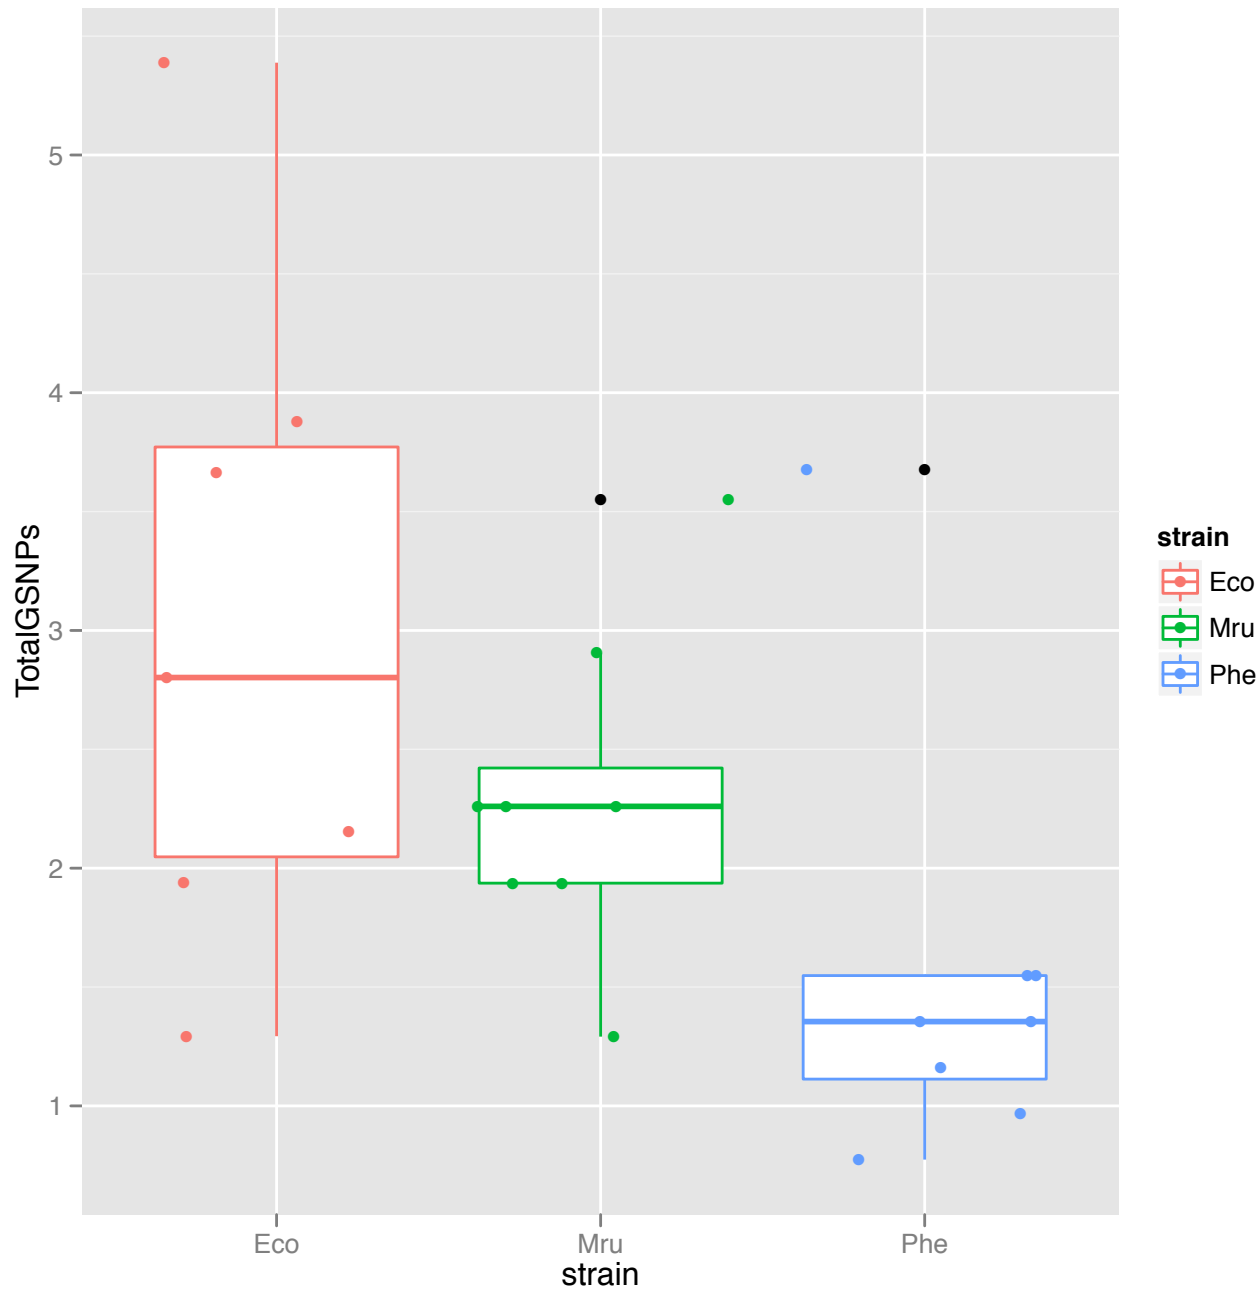



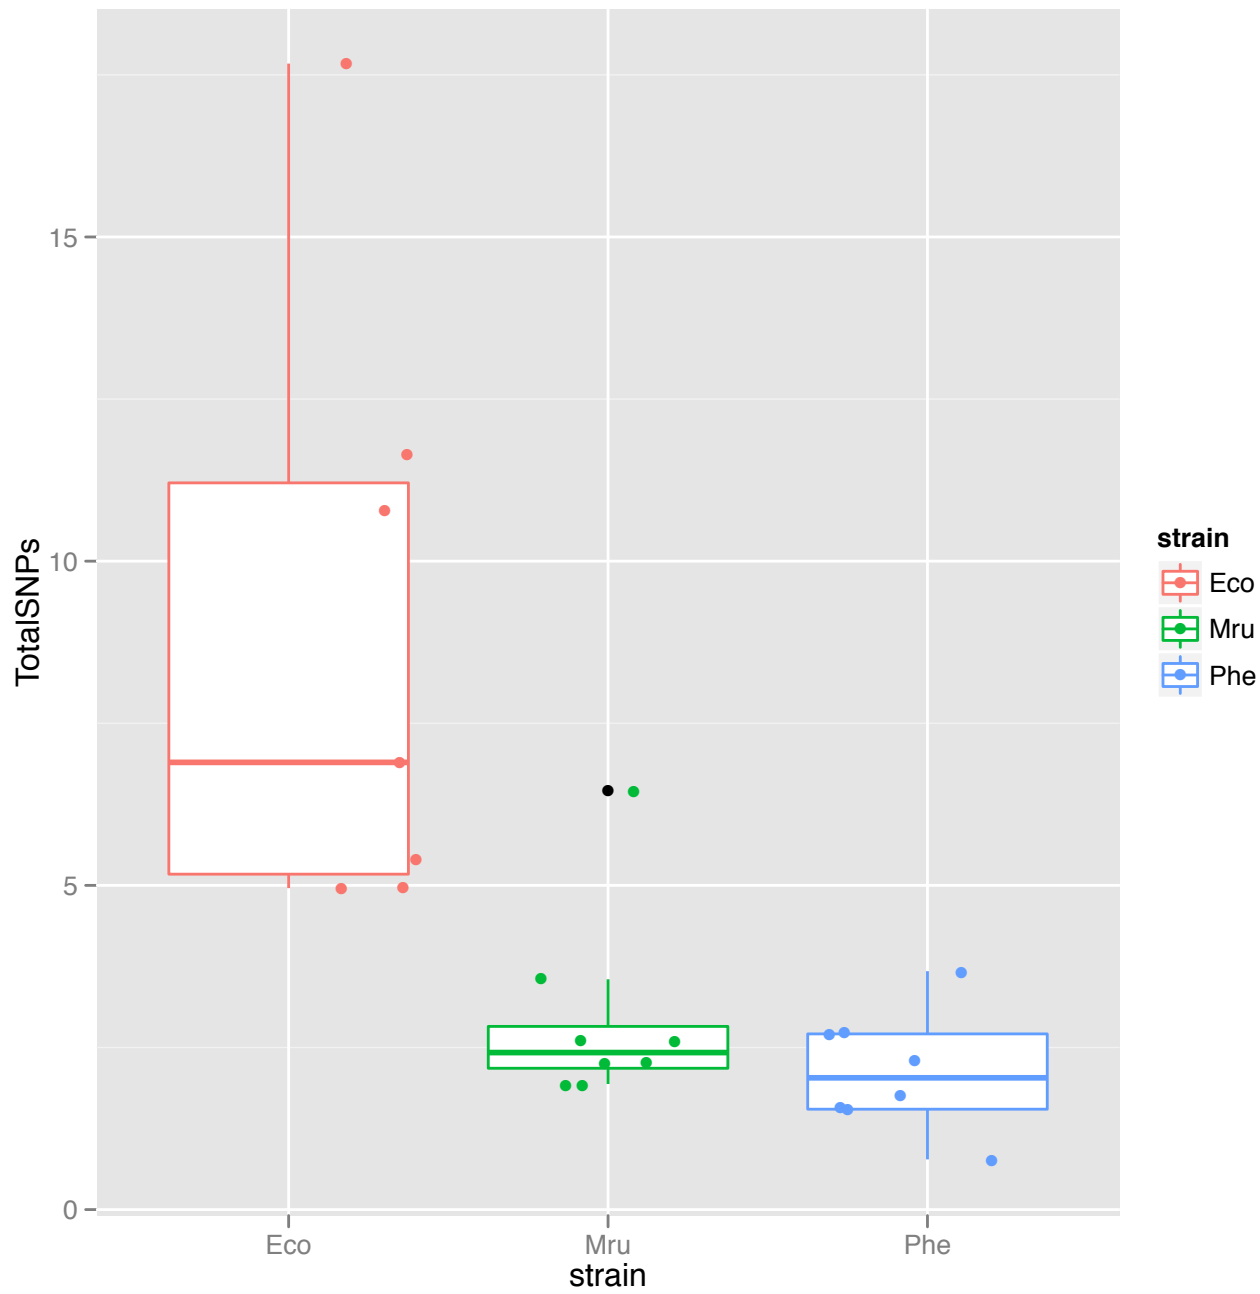

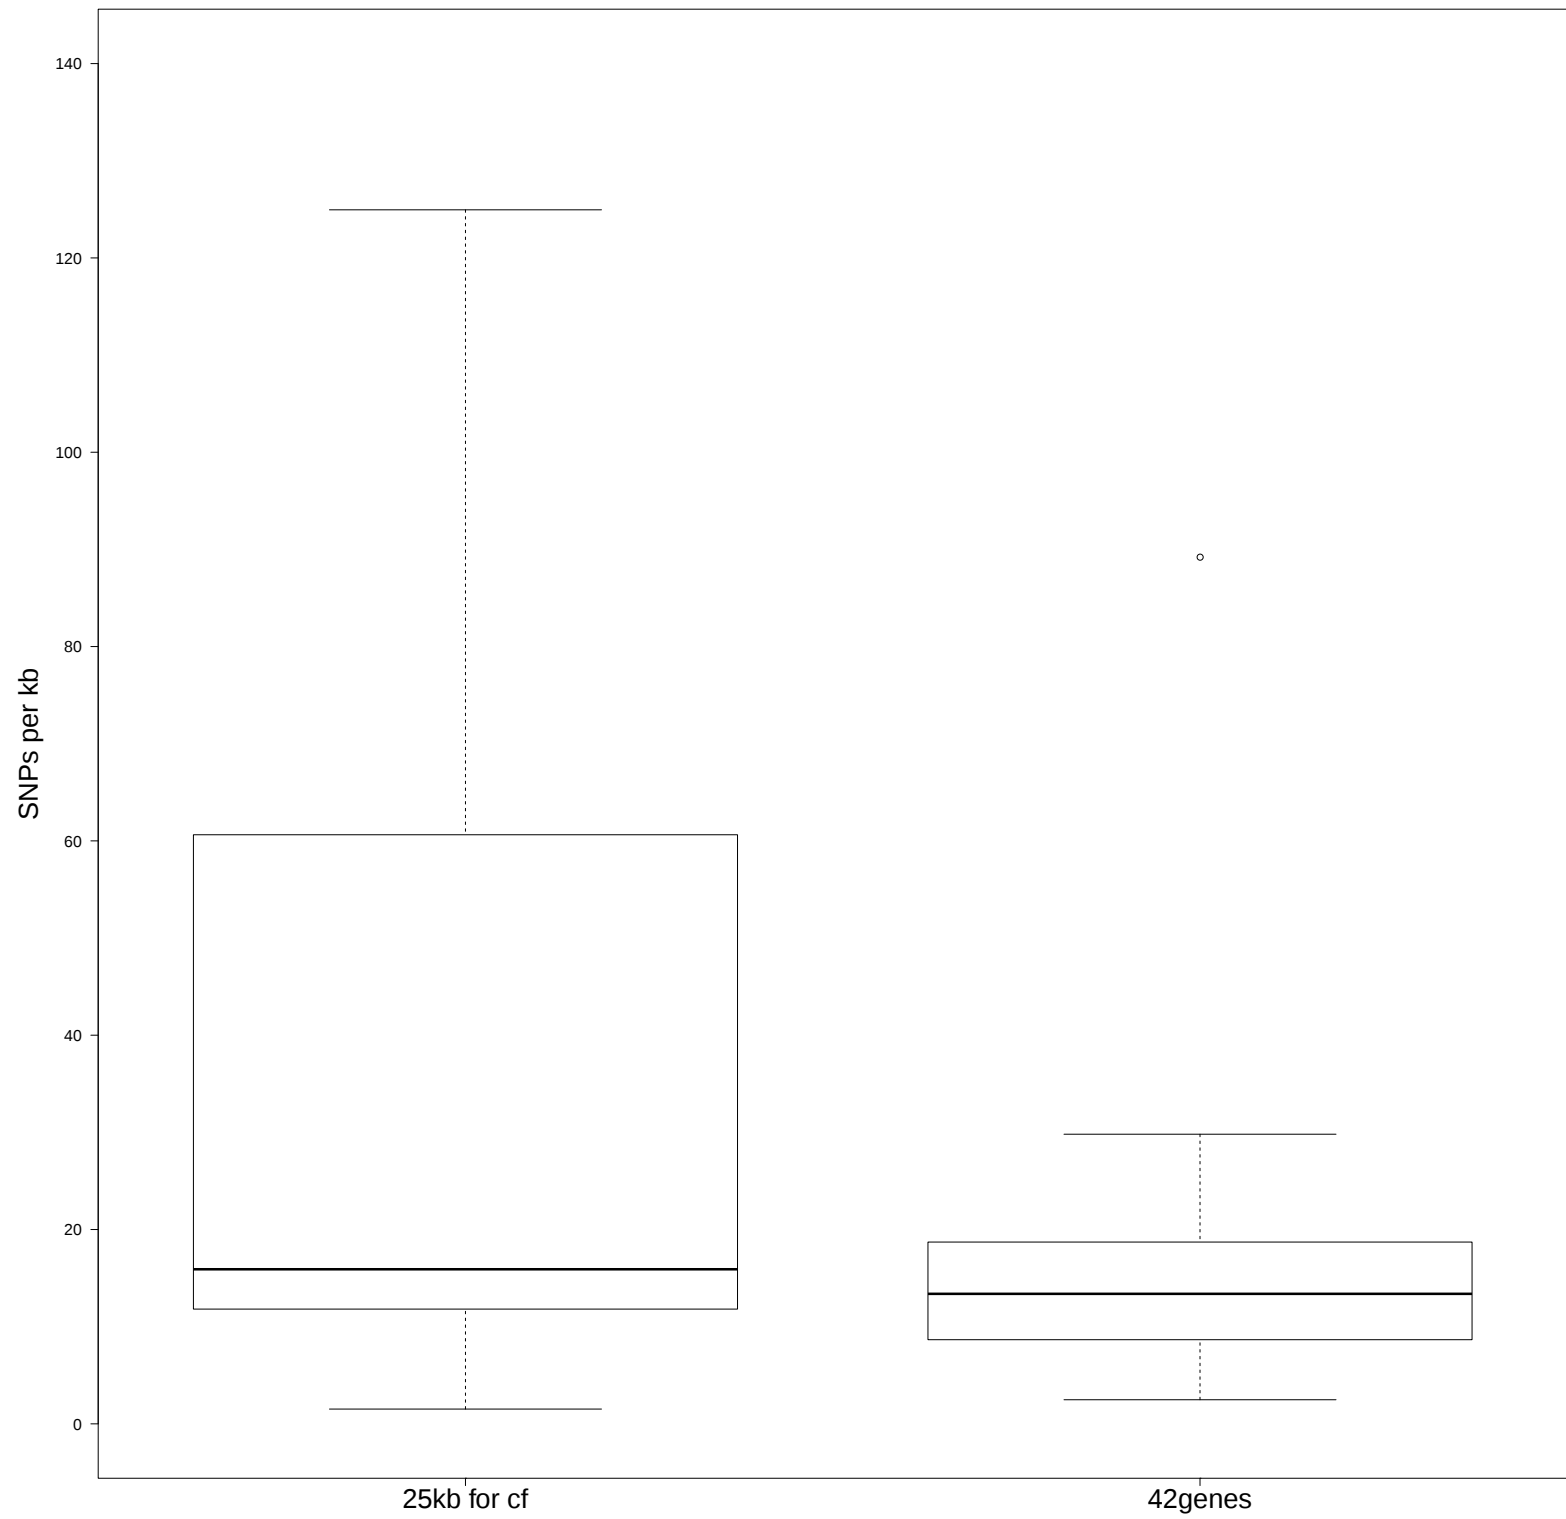

Supplement: gb-2013-14-11-r130-S1.pdf [file gb-2013-14-11-r130-S1.pdf]
