# Supplementary material for: Single-cell genomics reveal low recombination frequencies in freshwater bacteria of the SAR11 clade
Source: PubMed Central journal article supplement (PMC4053759; doi:10.1186/gb-2013-14-11-r130), 2013-11-28

### 3 groEL

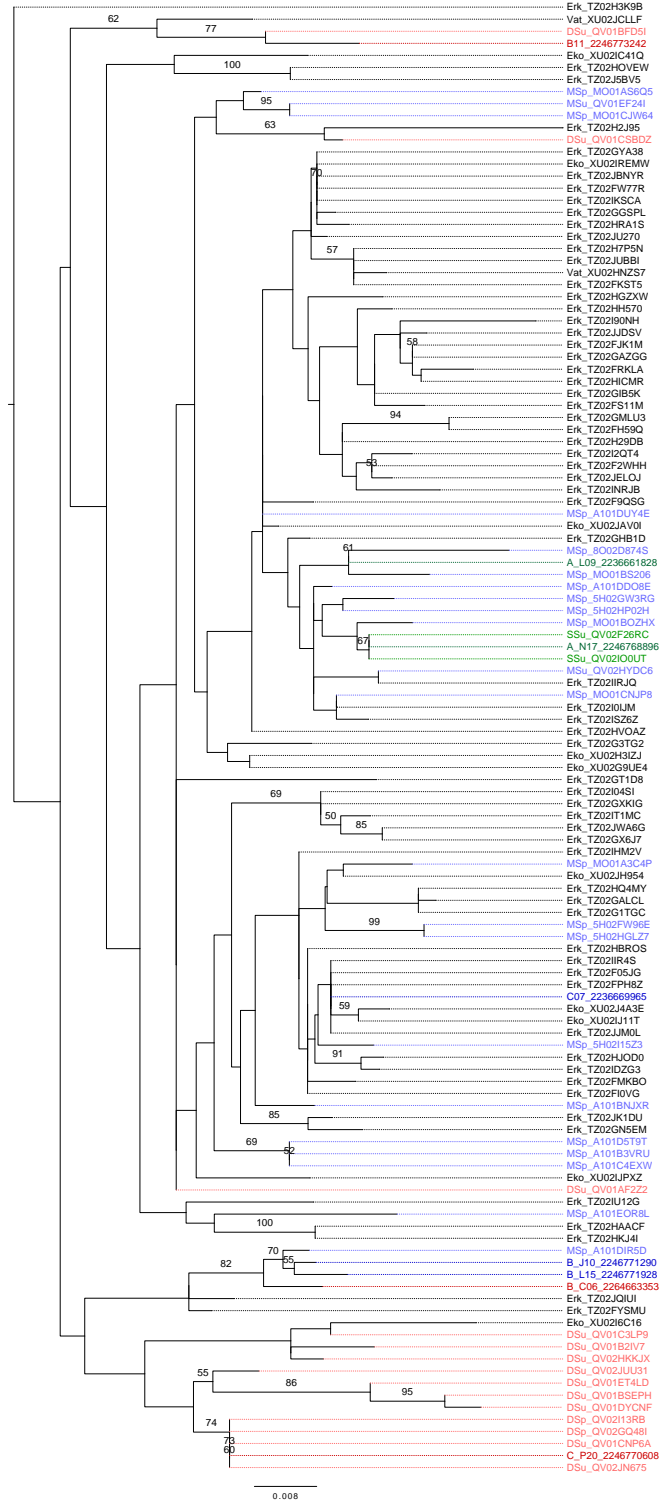

143 dapE

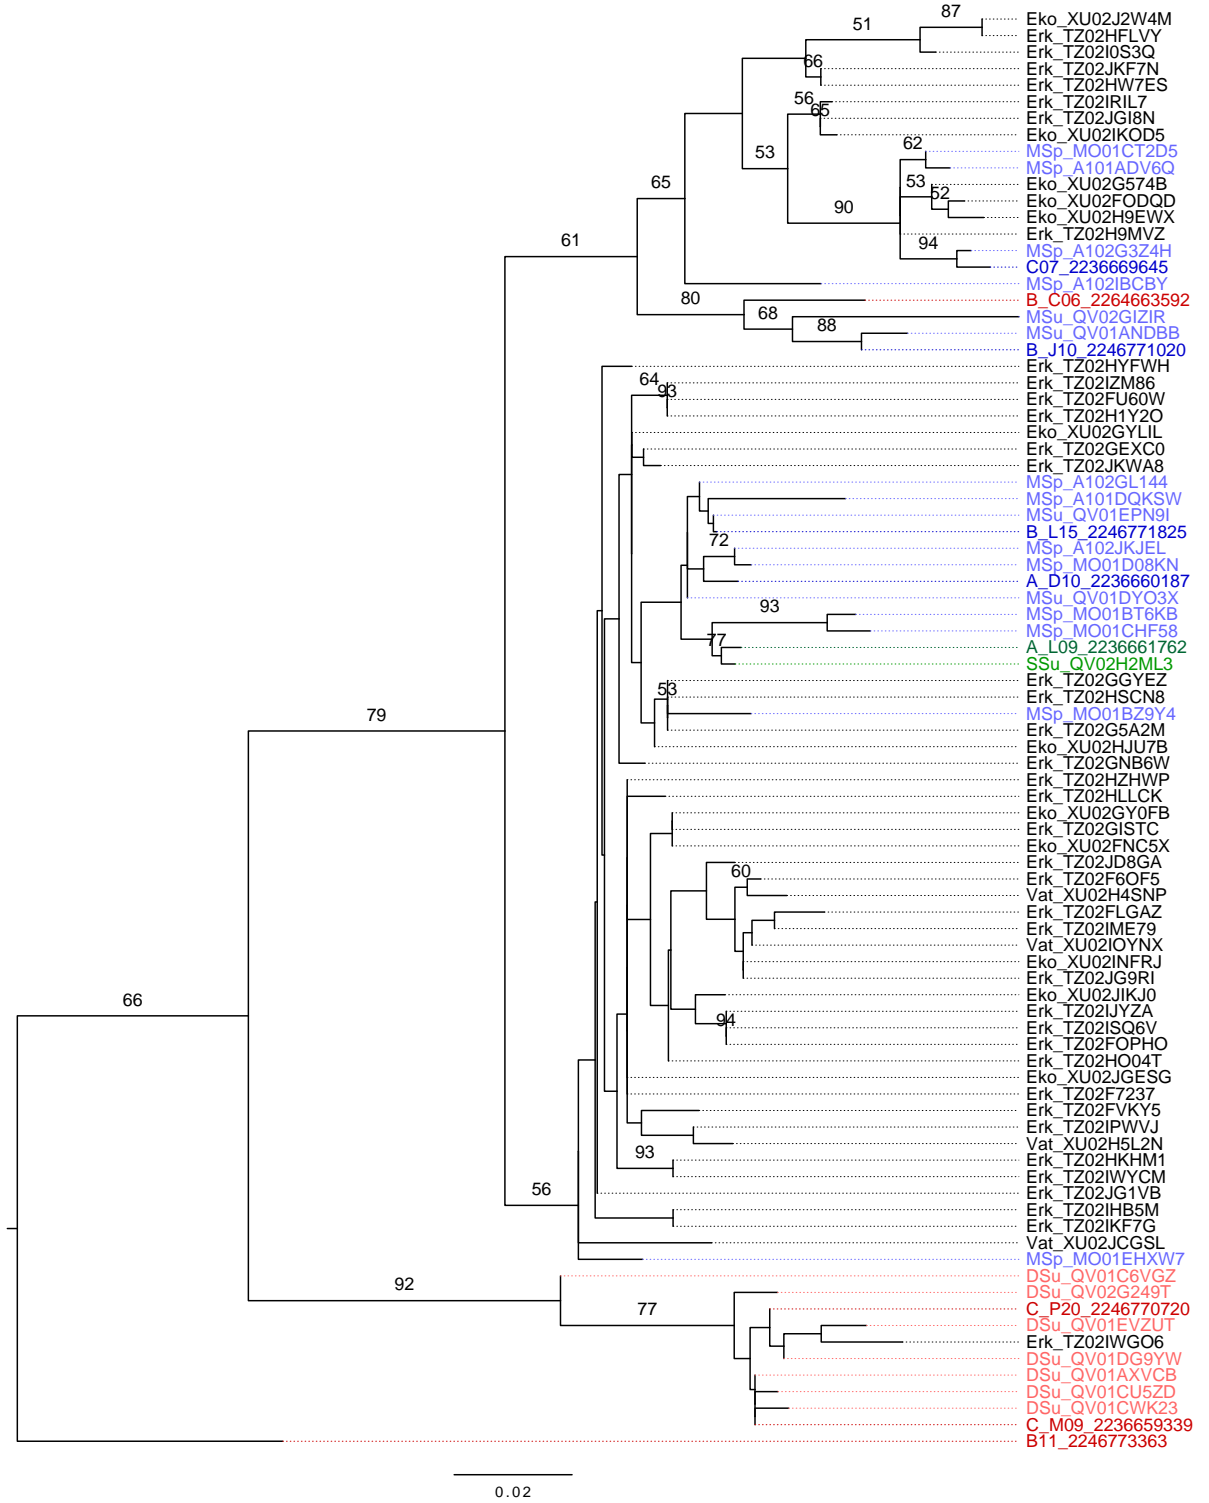

183 priA

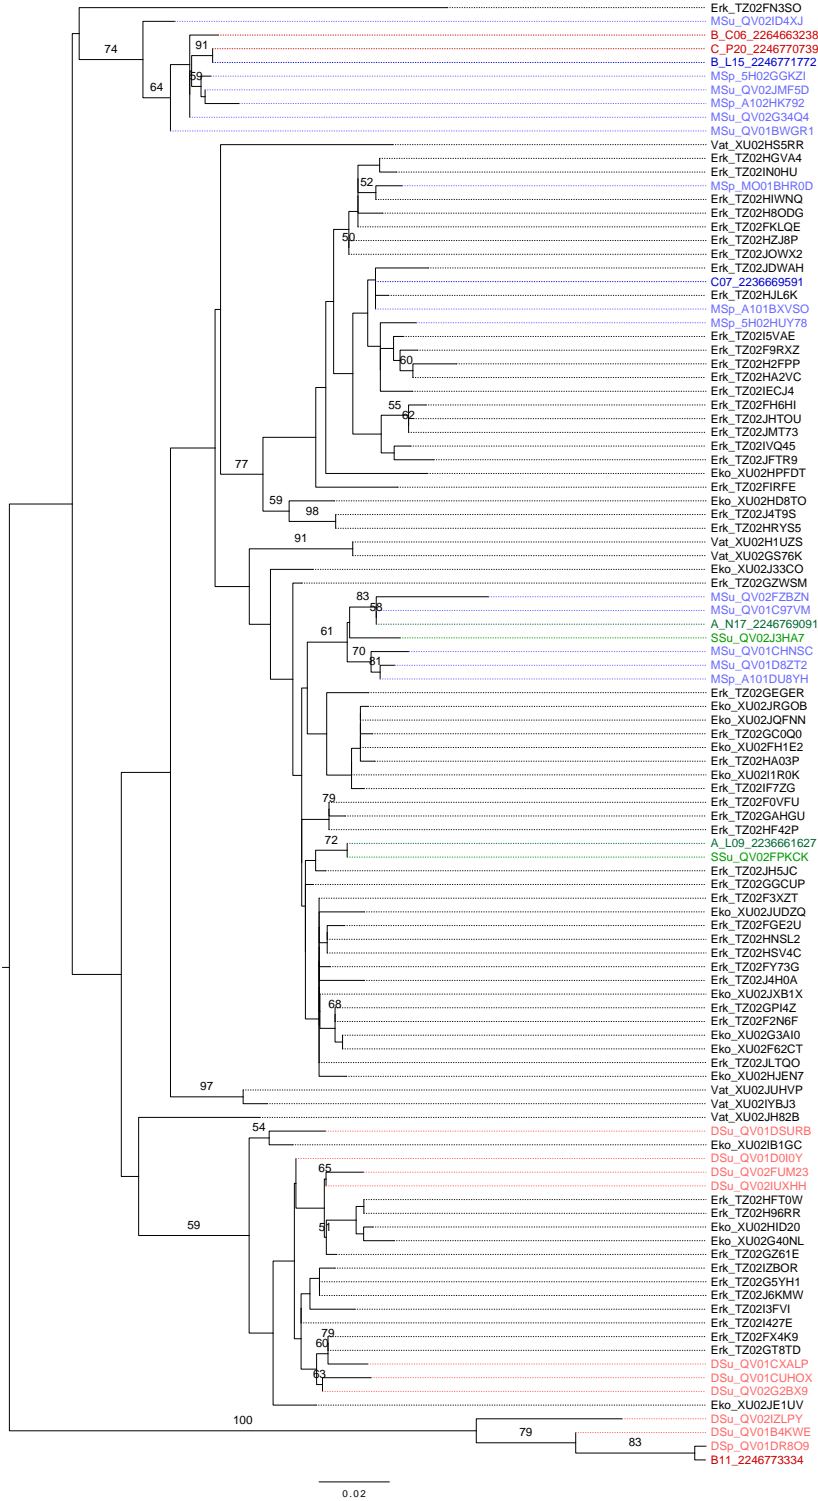

442 purH

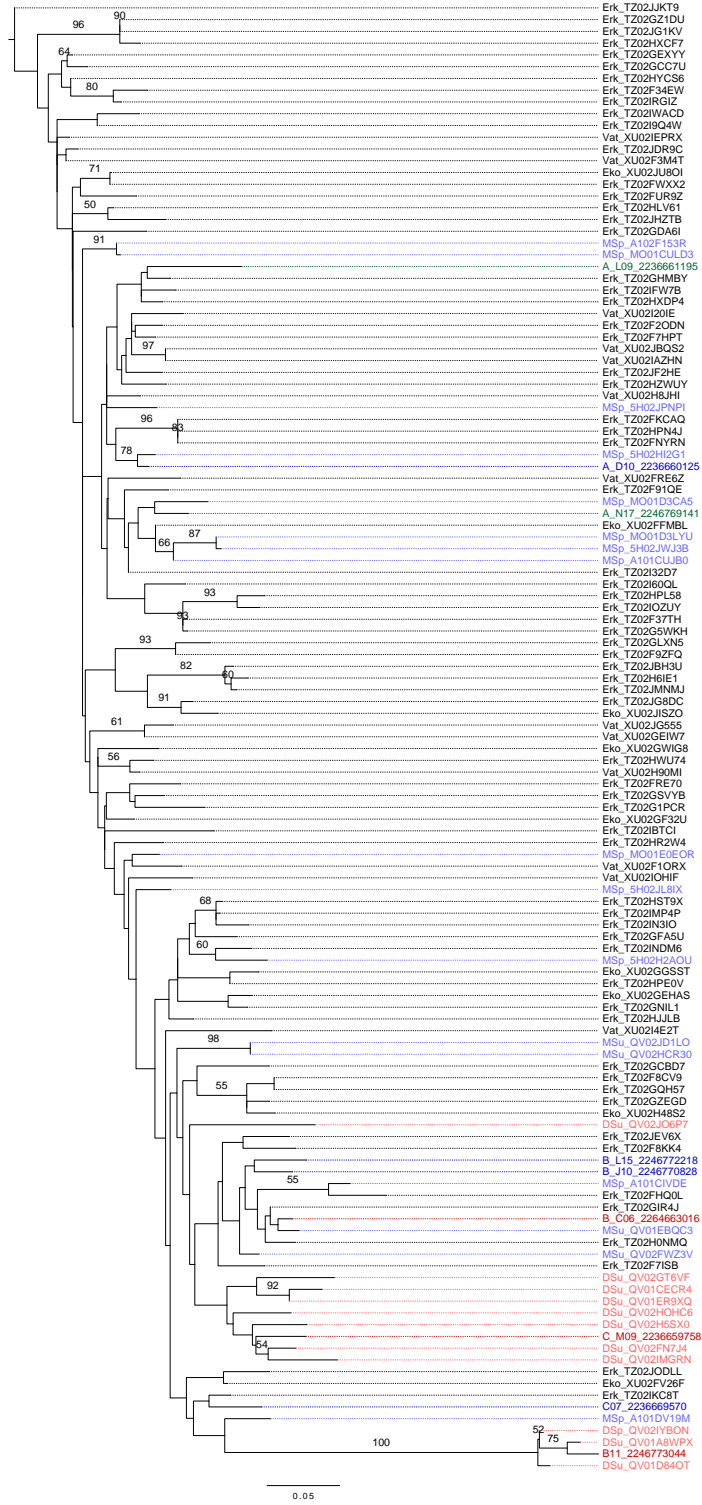

74 nusA

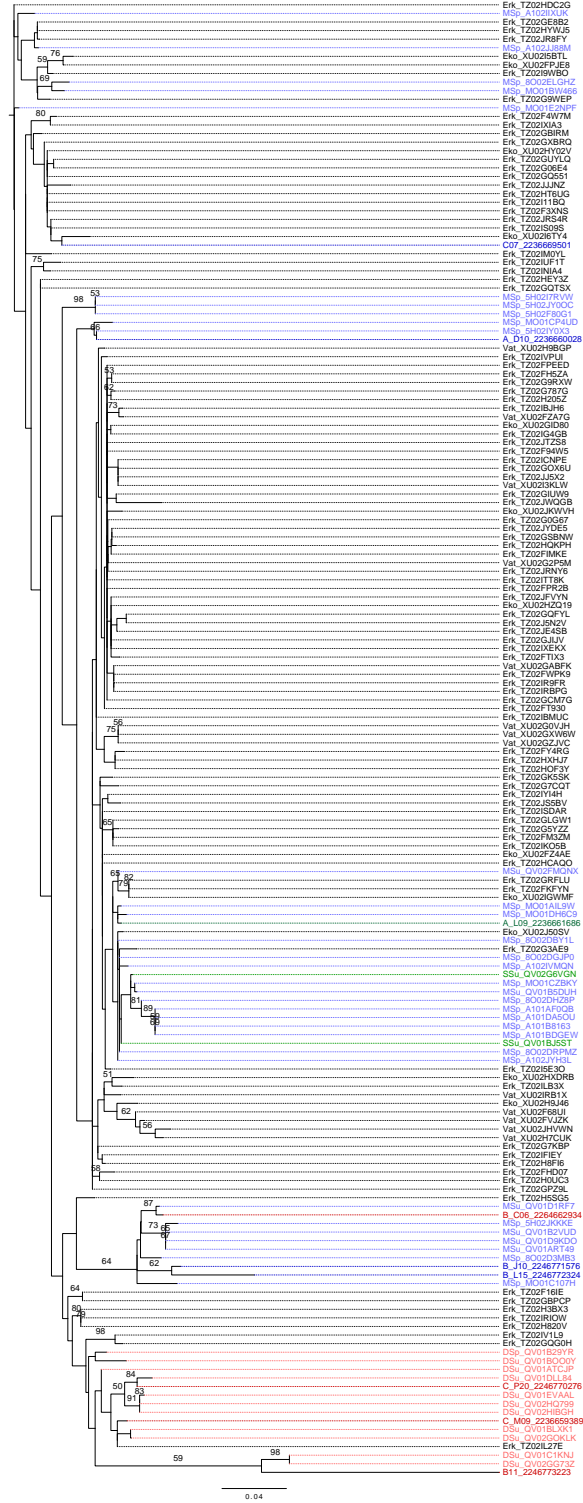

13 ftsK

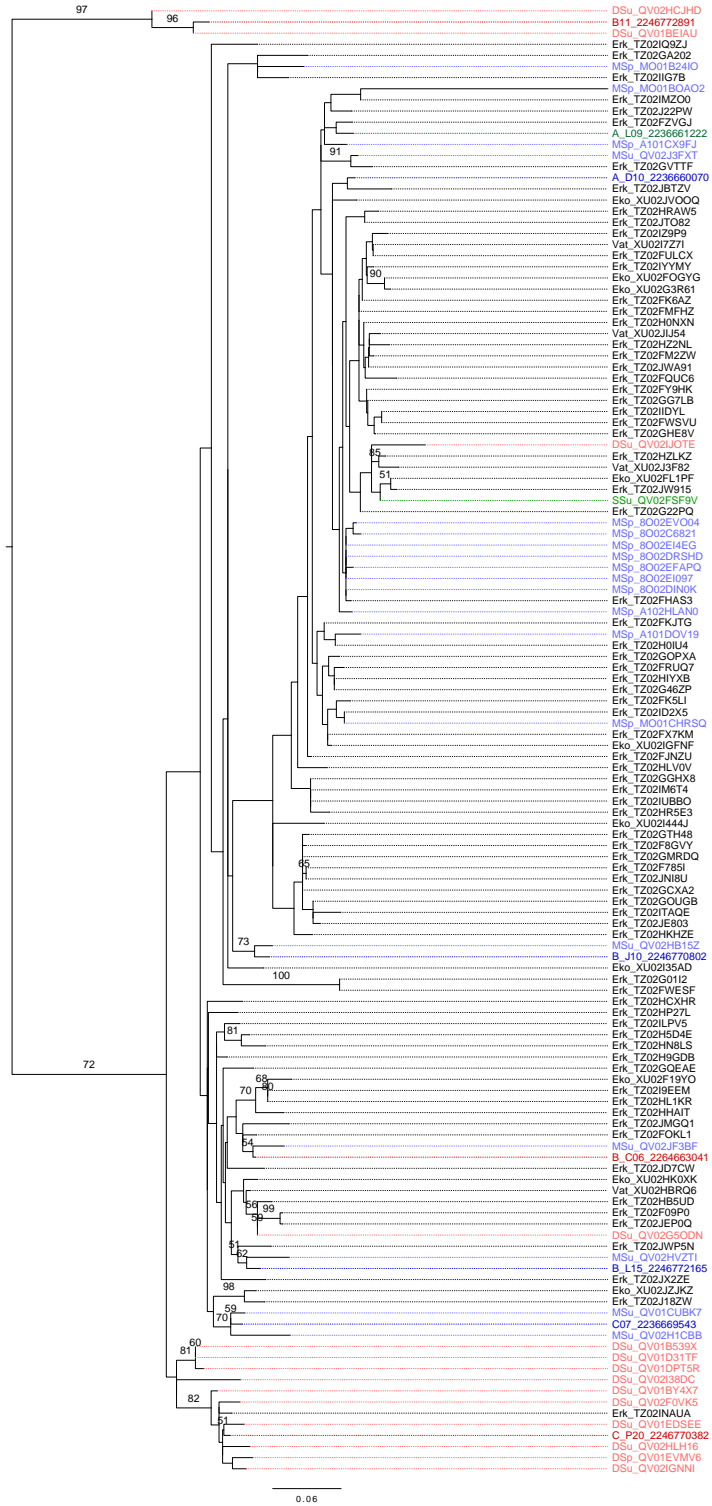

33 rho

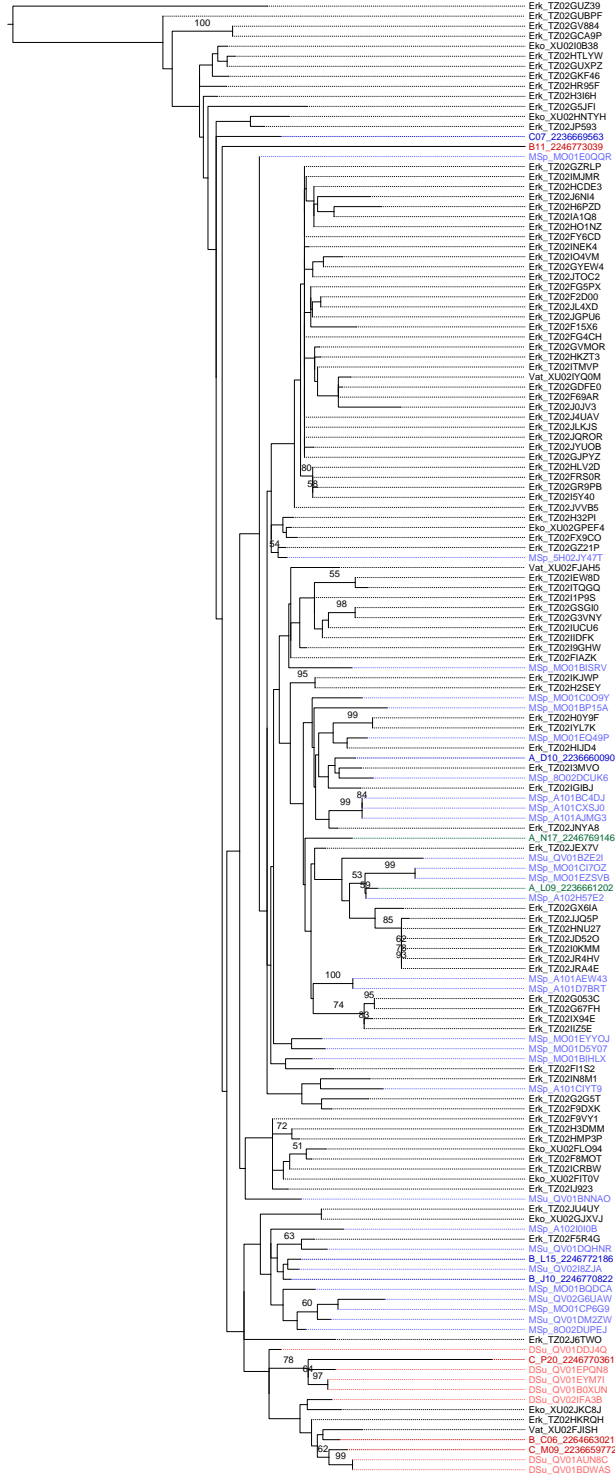

45 tolC

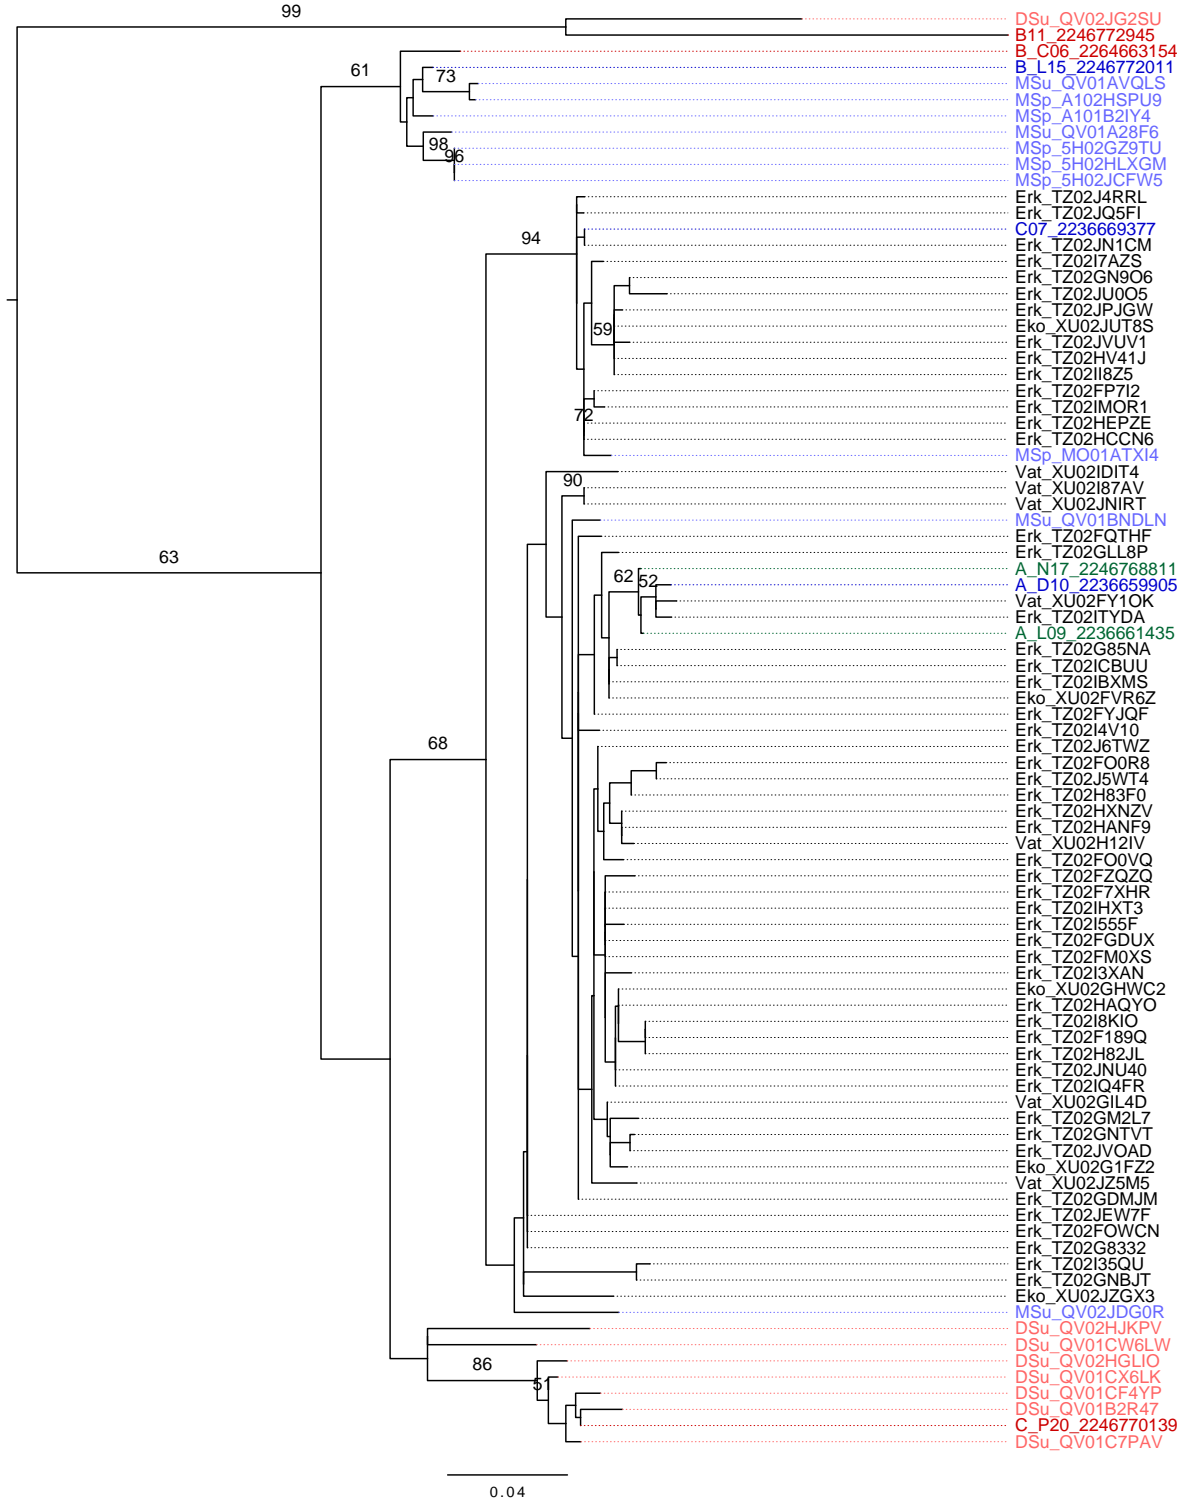





73 infB

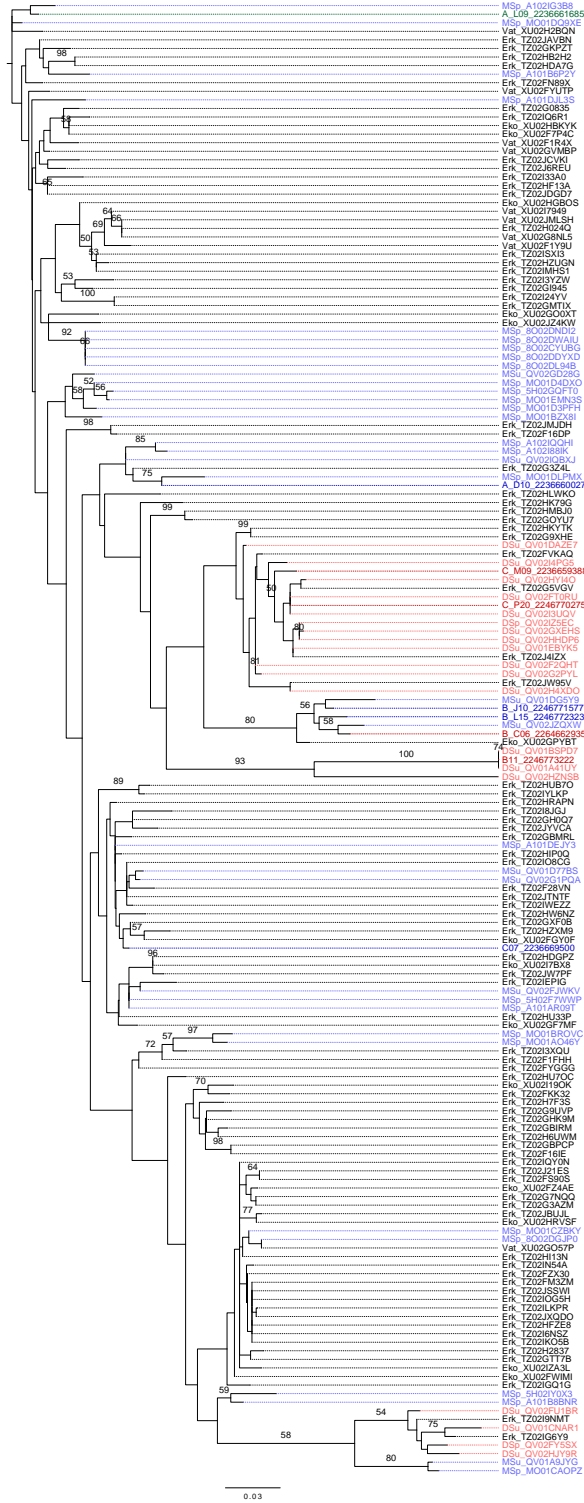

81 mgtE

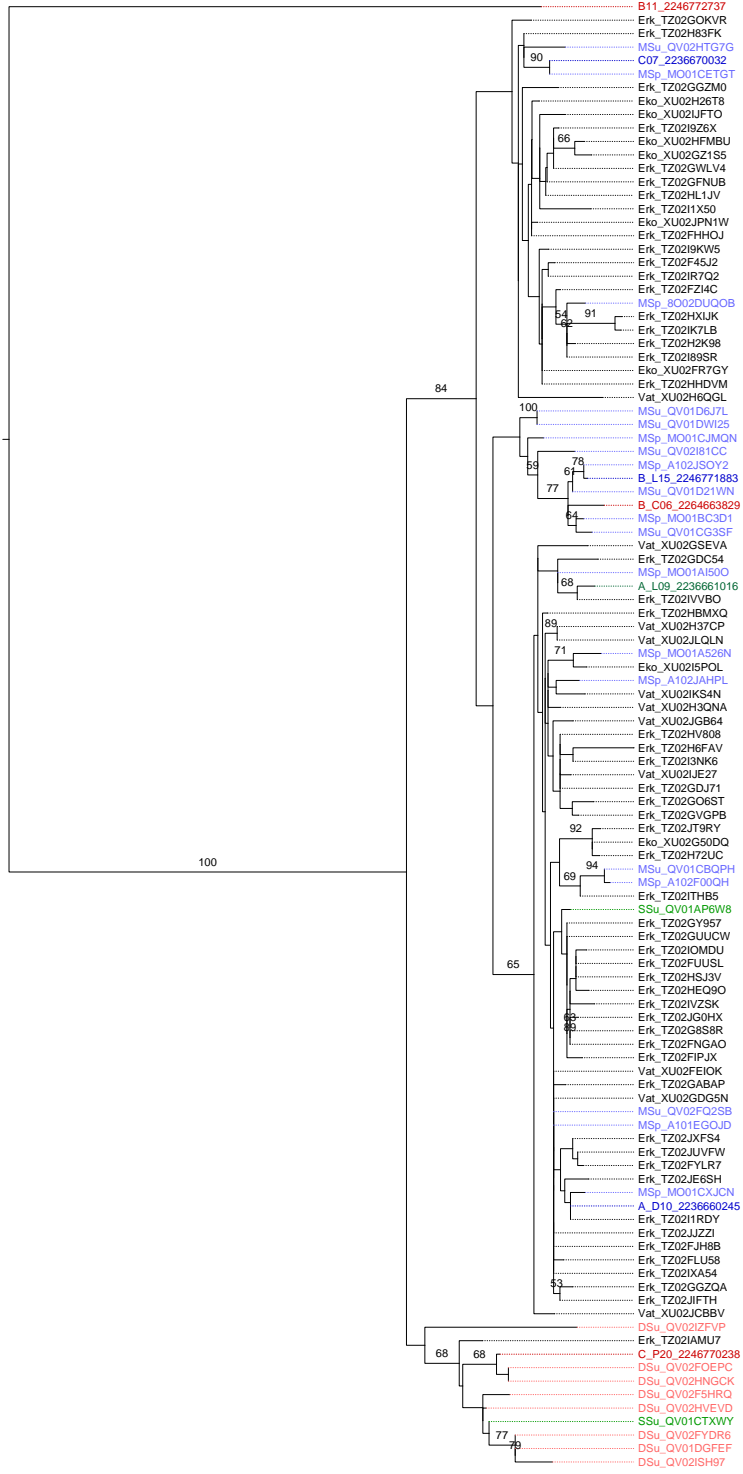

0.04



86 ftsA

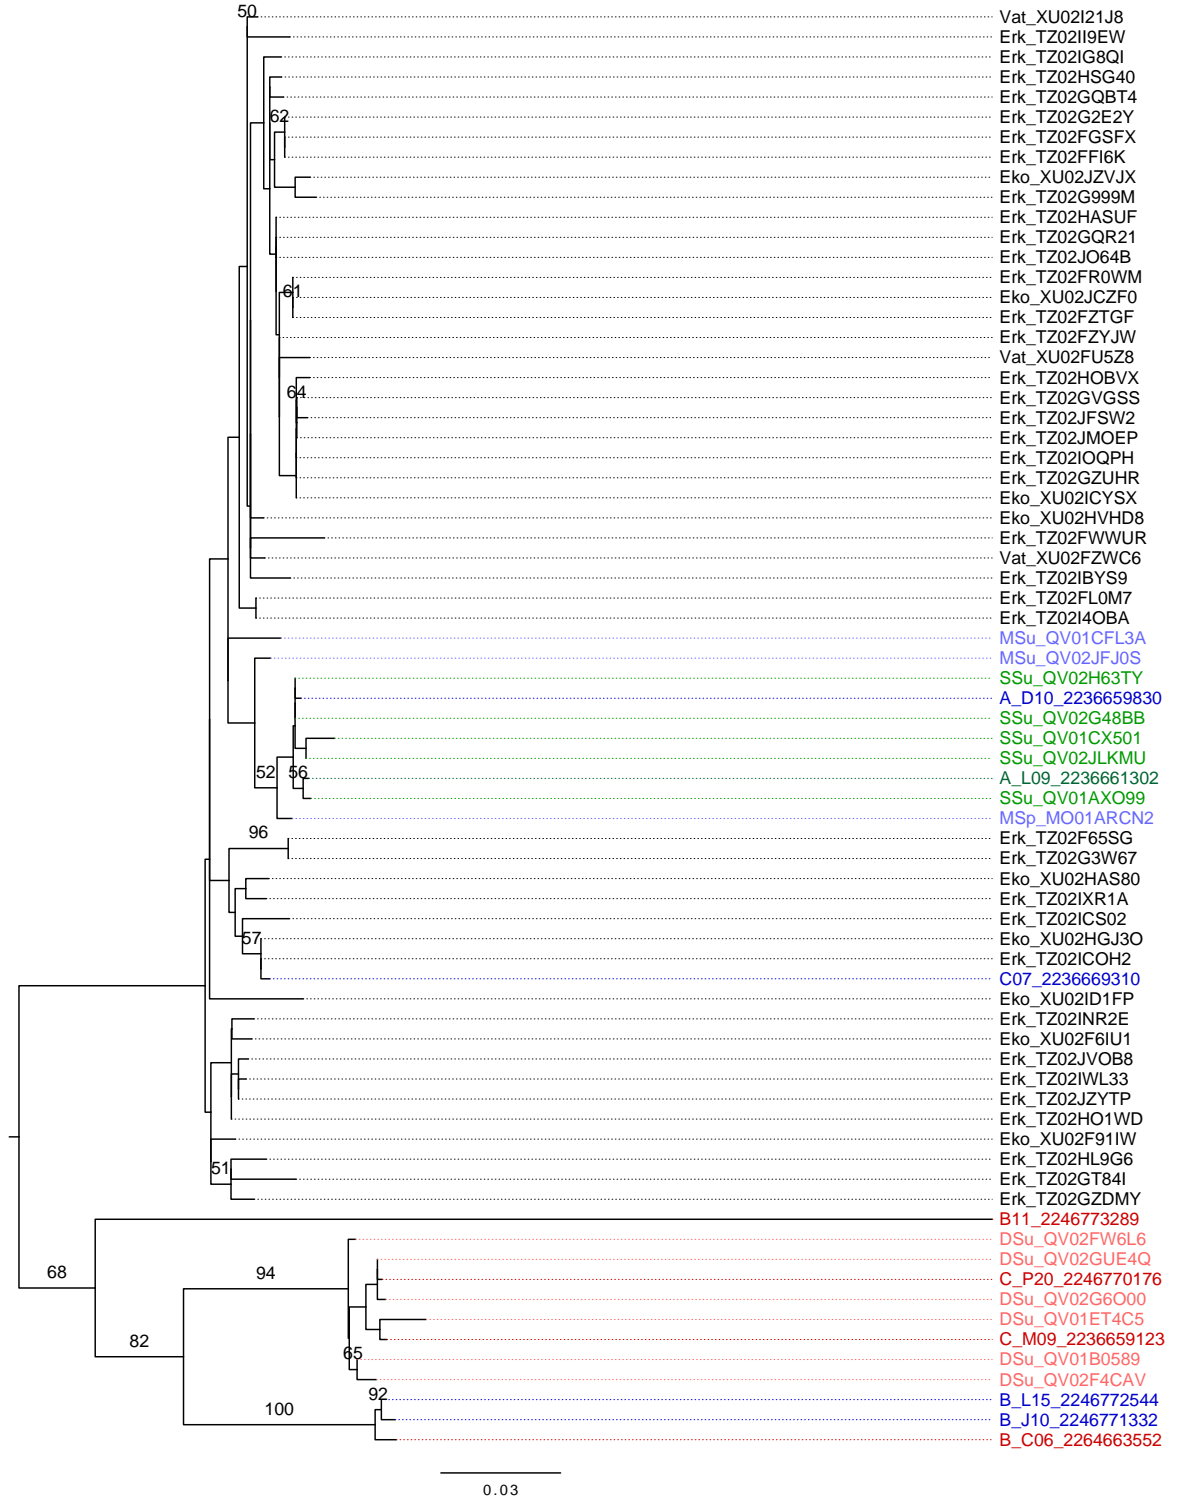

92 sucC

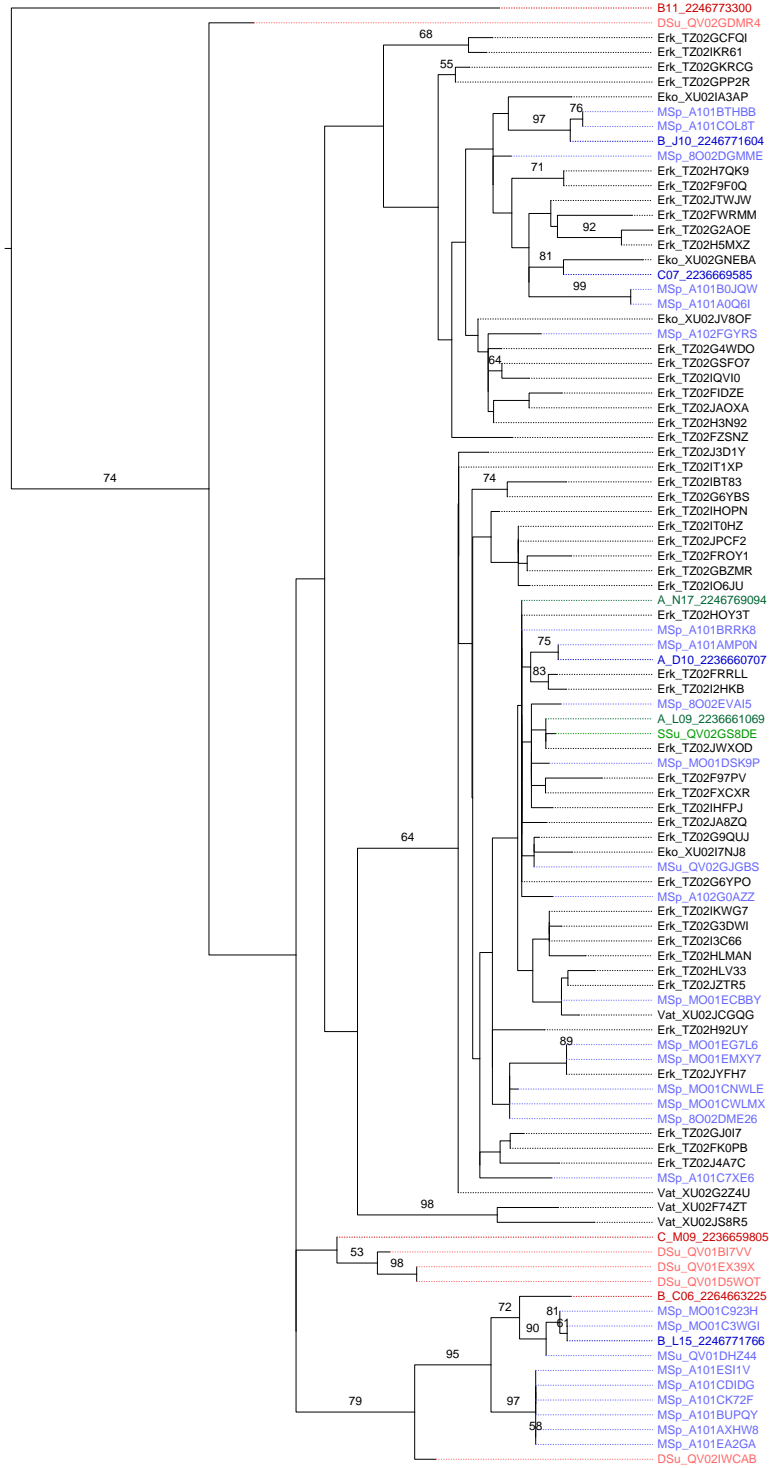

0.02

93 leuS

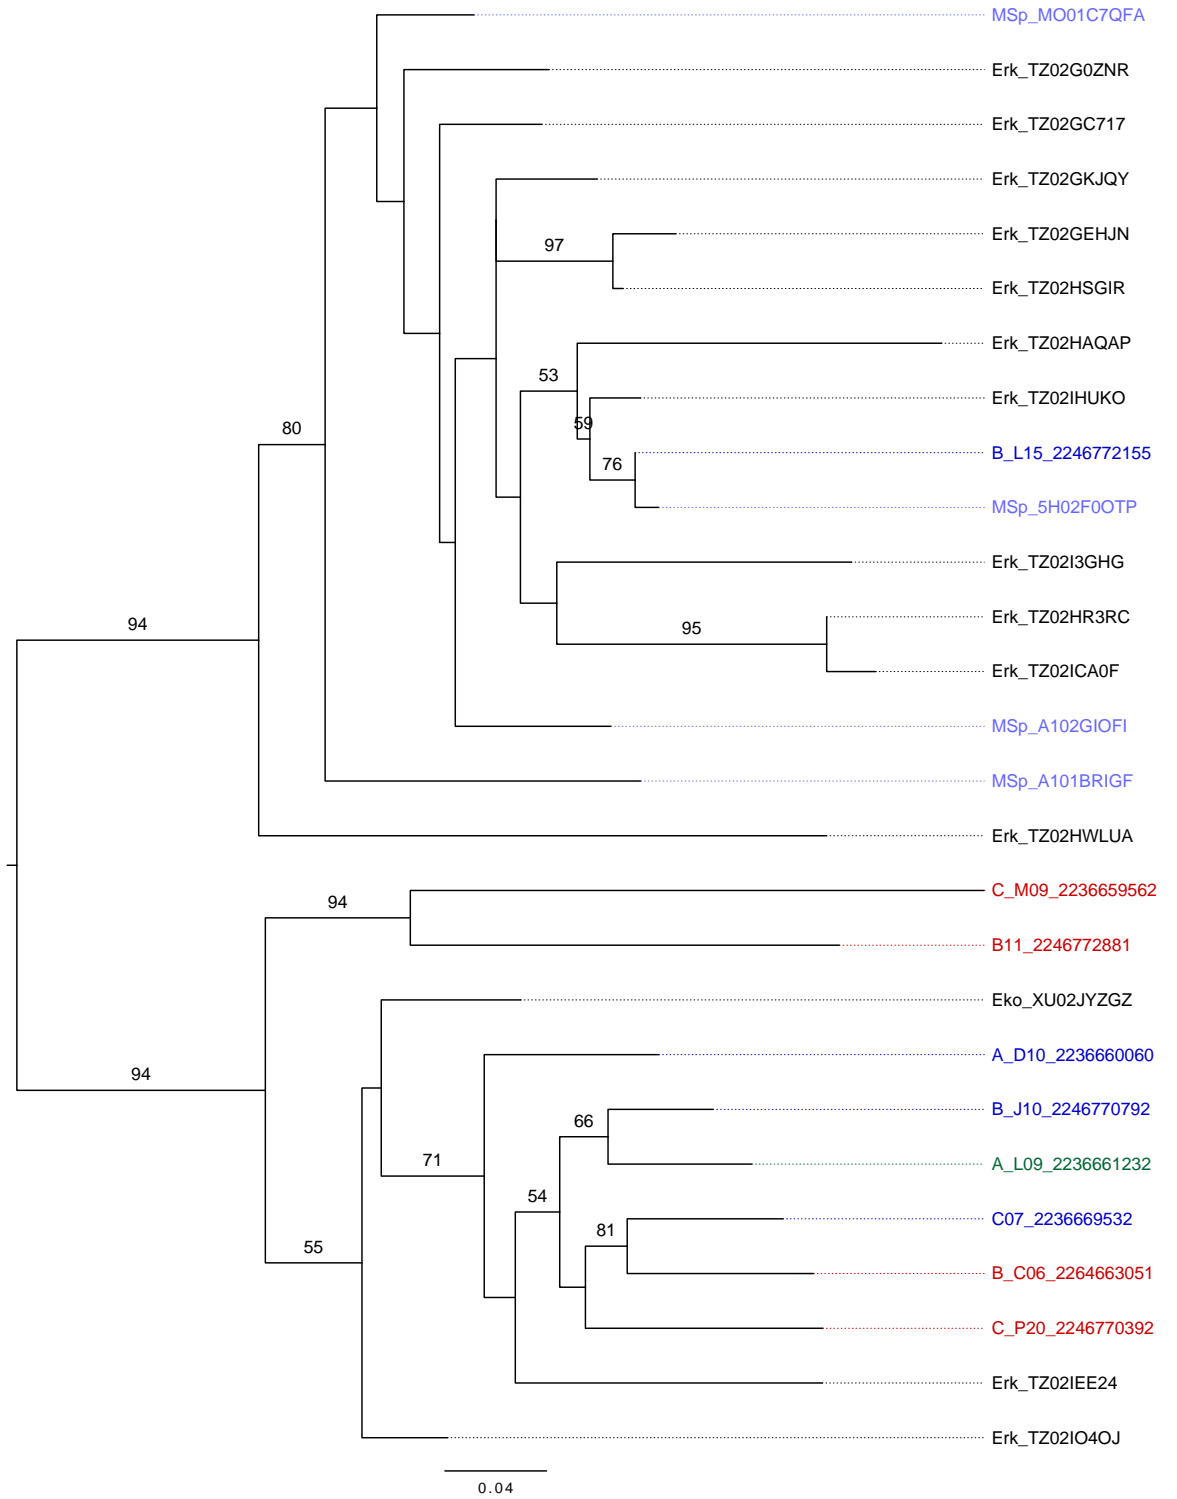





95 trmE

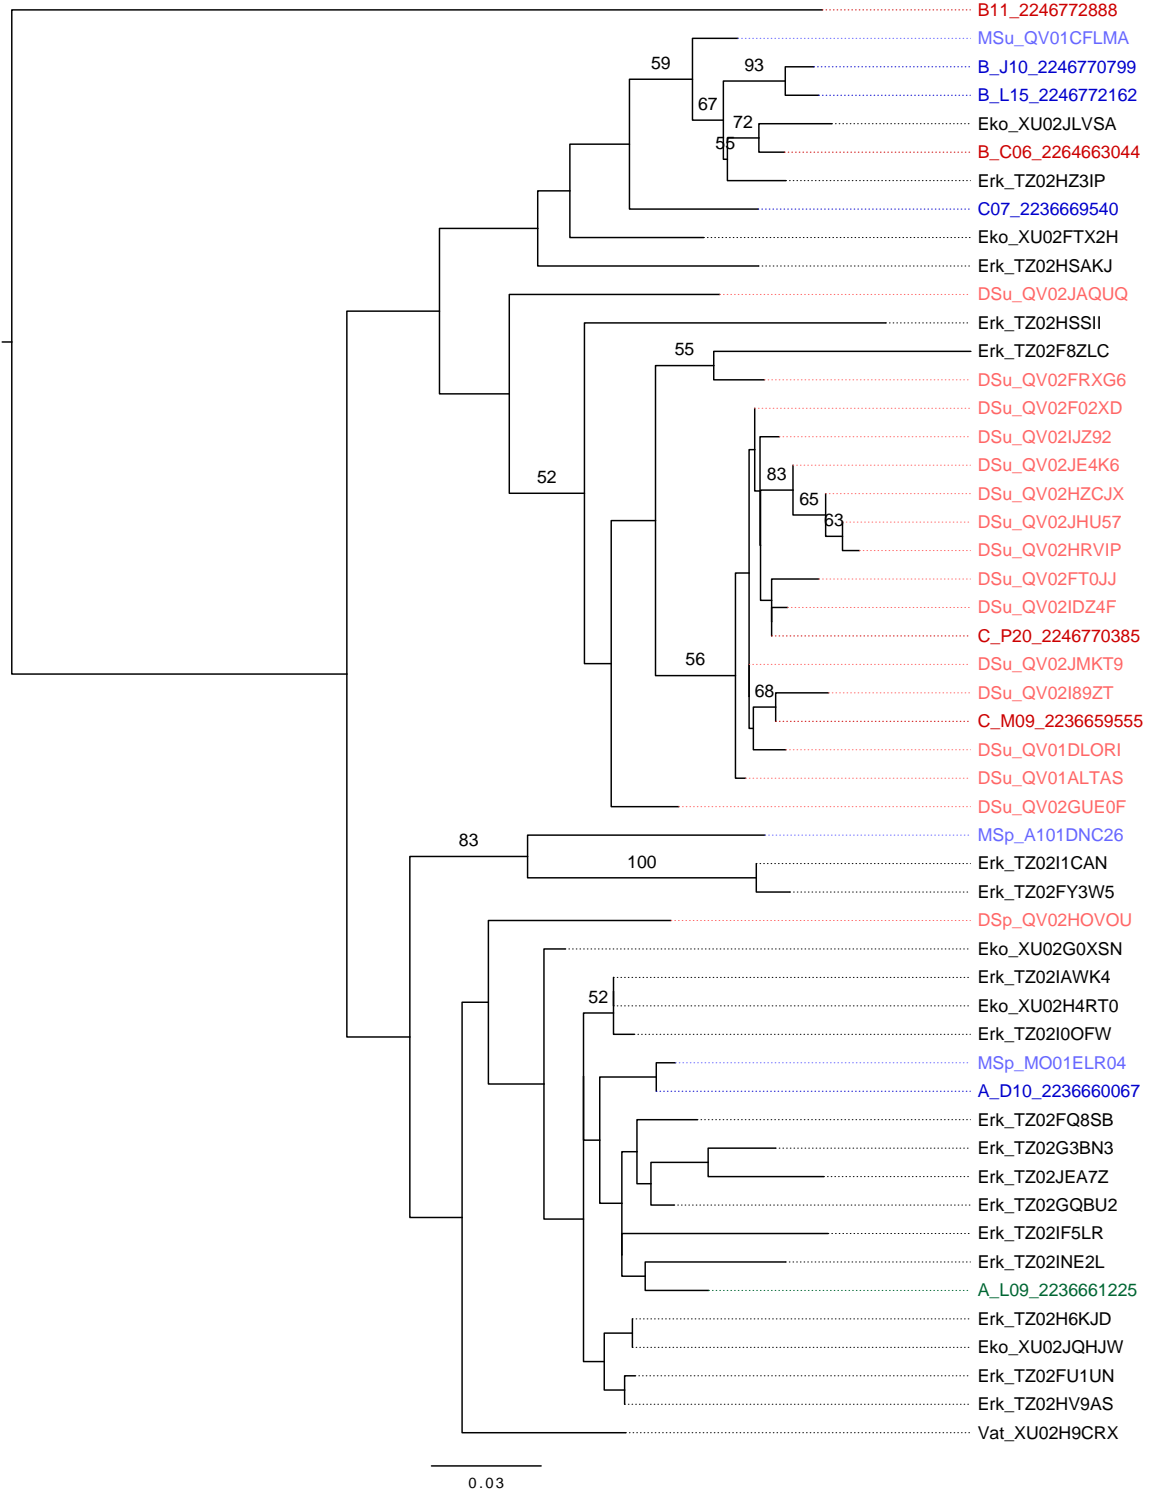

102 dnaN

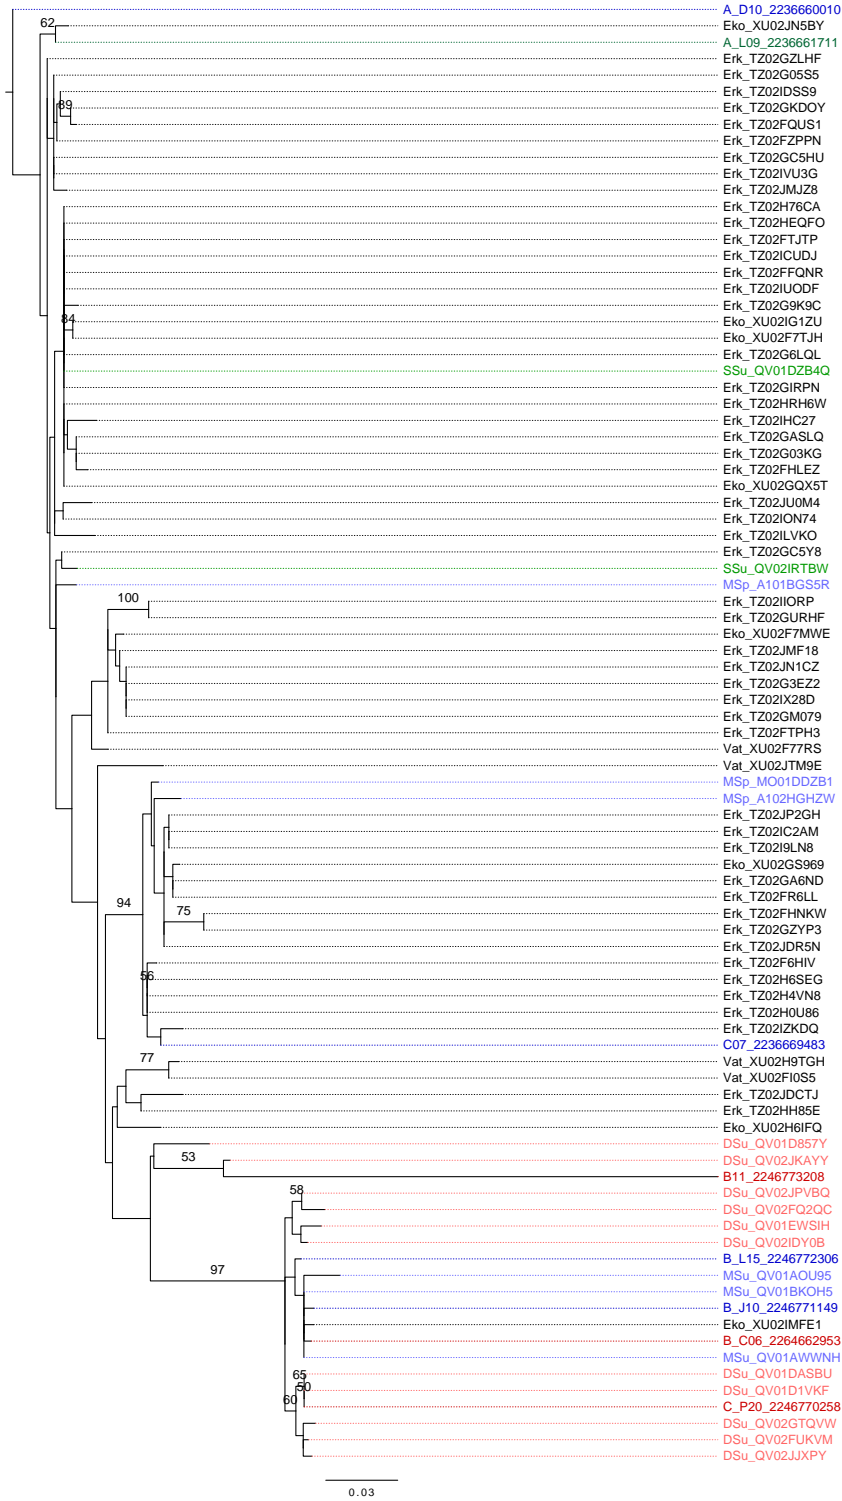

104 dnaA

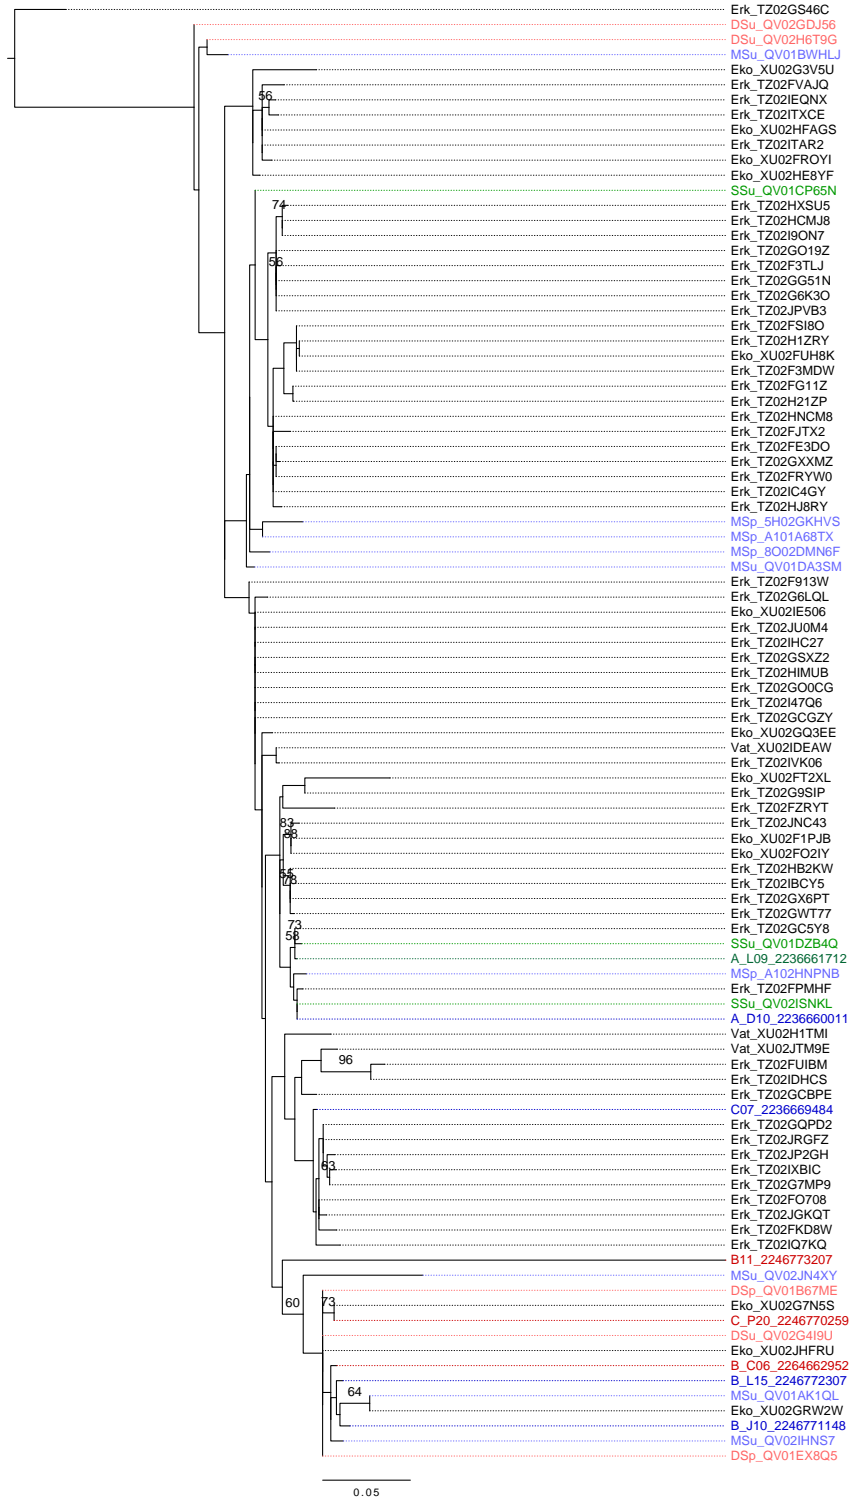

122 recA

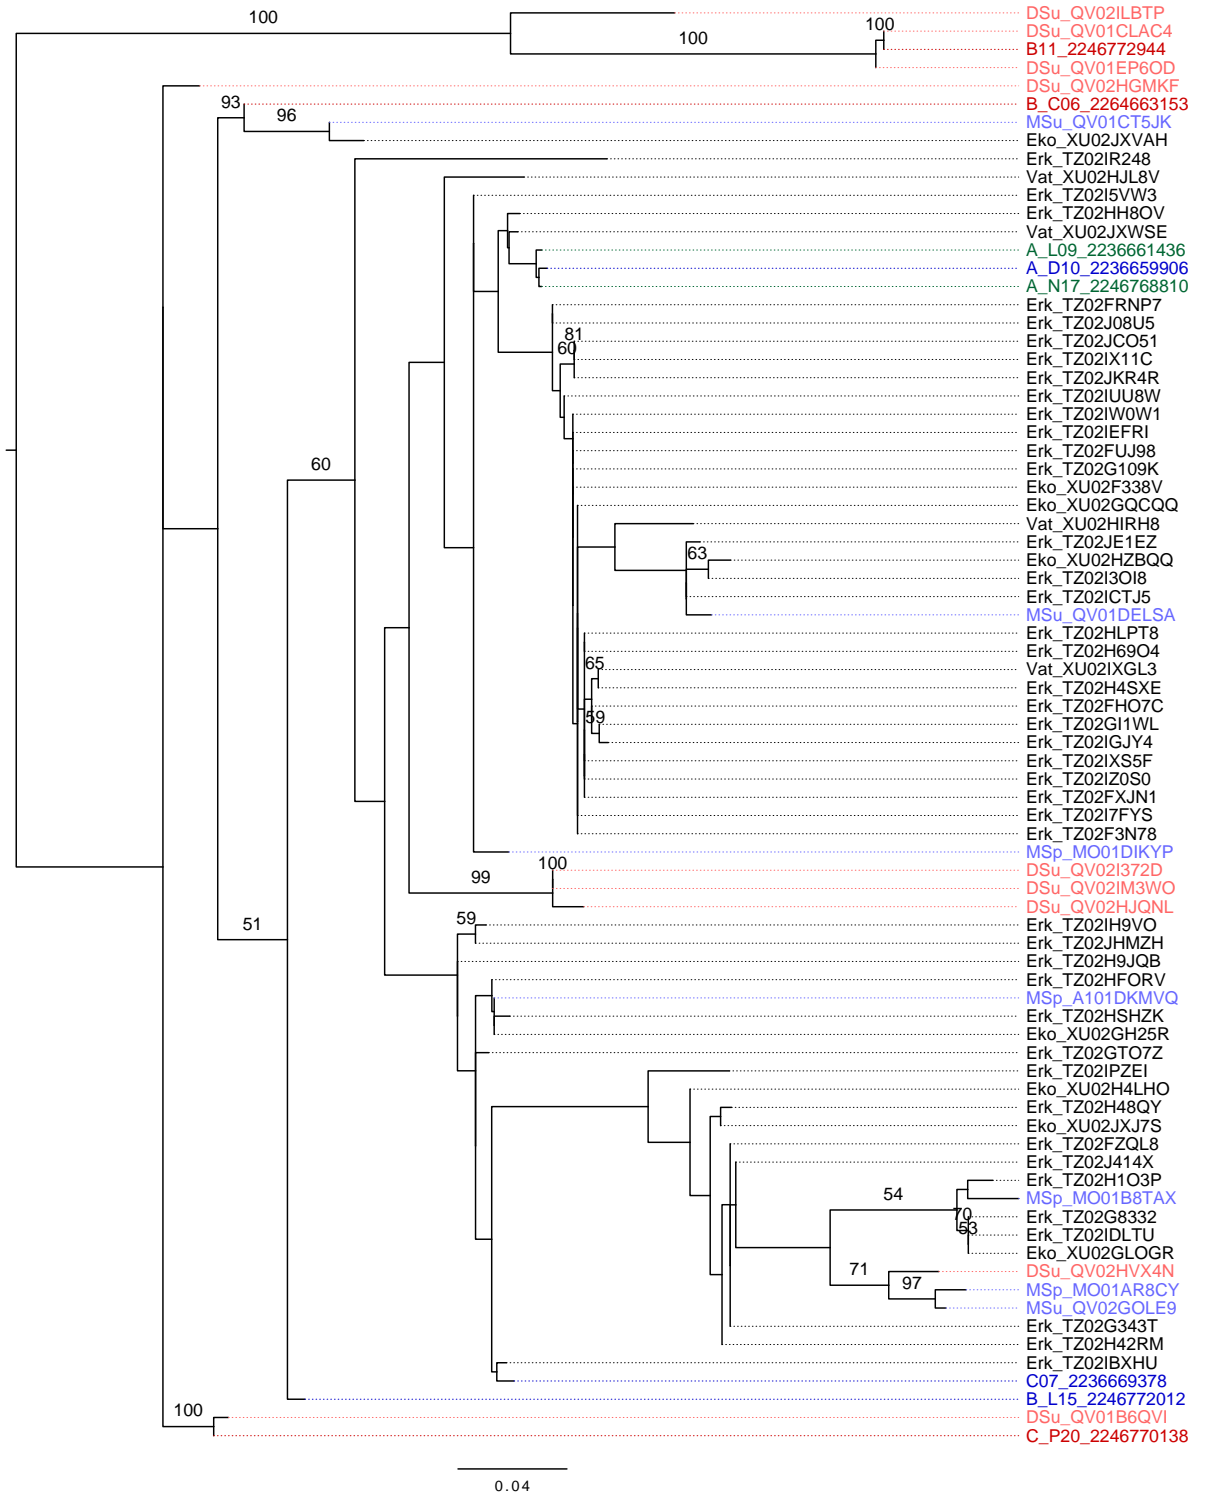

127 atpD

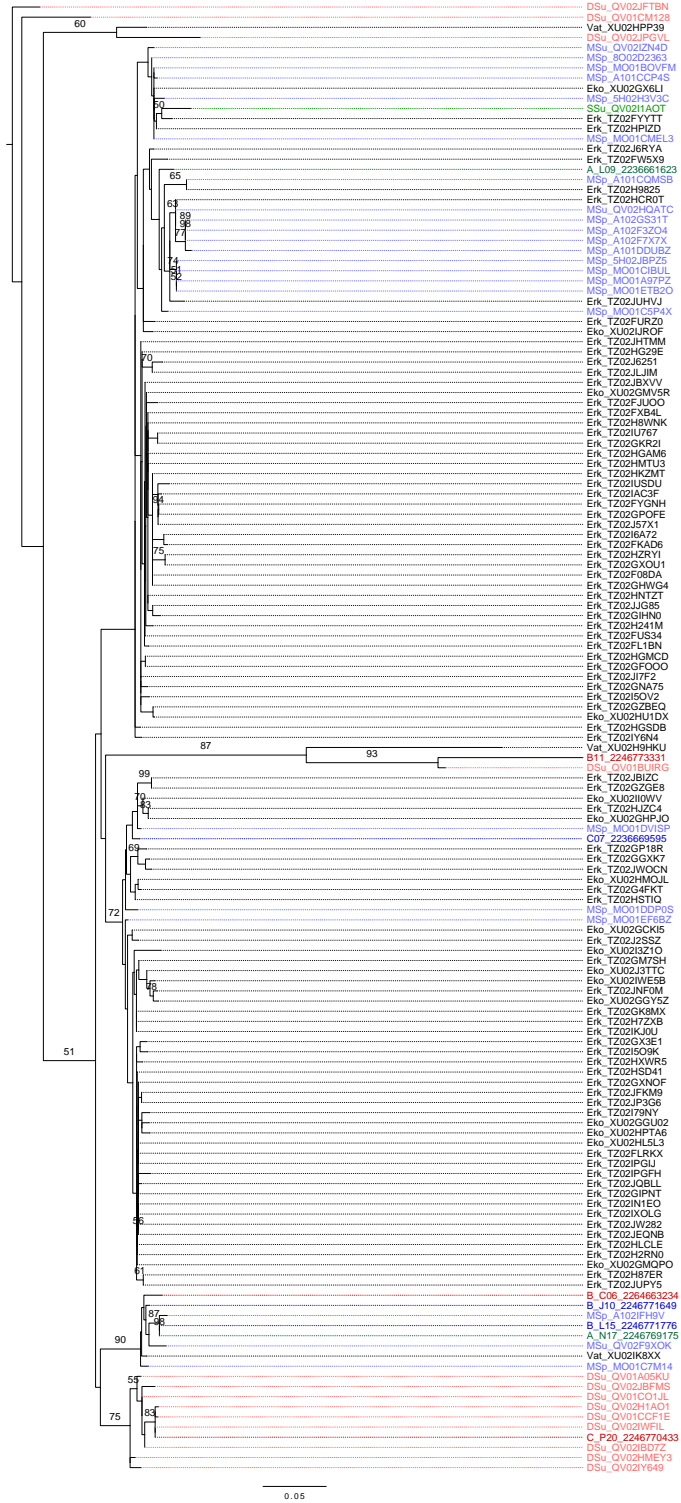

130 ubiH

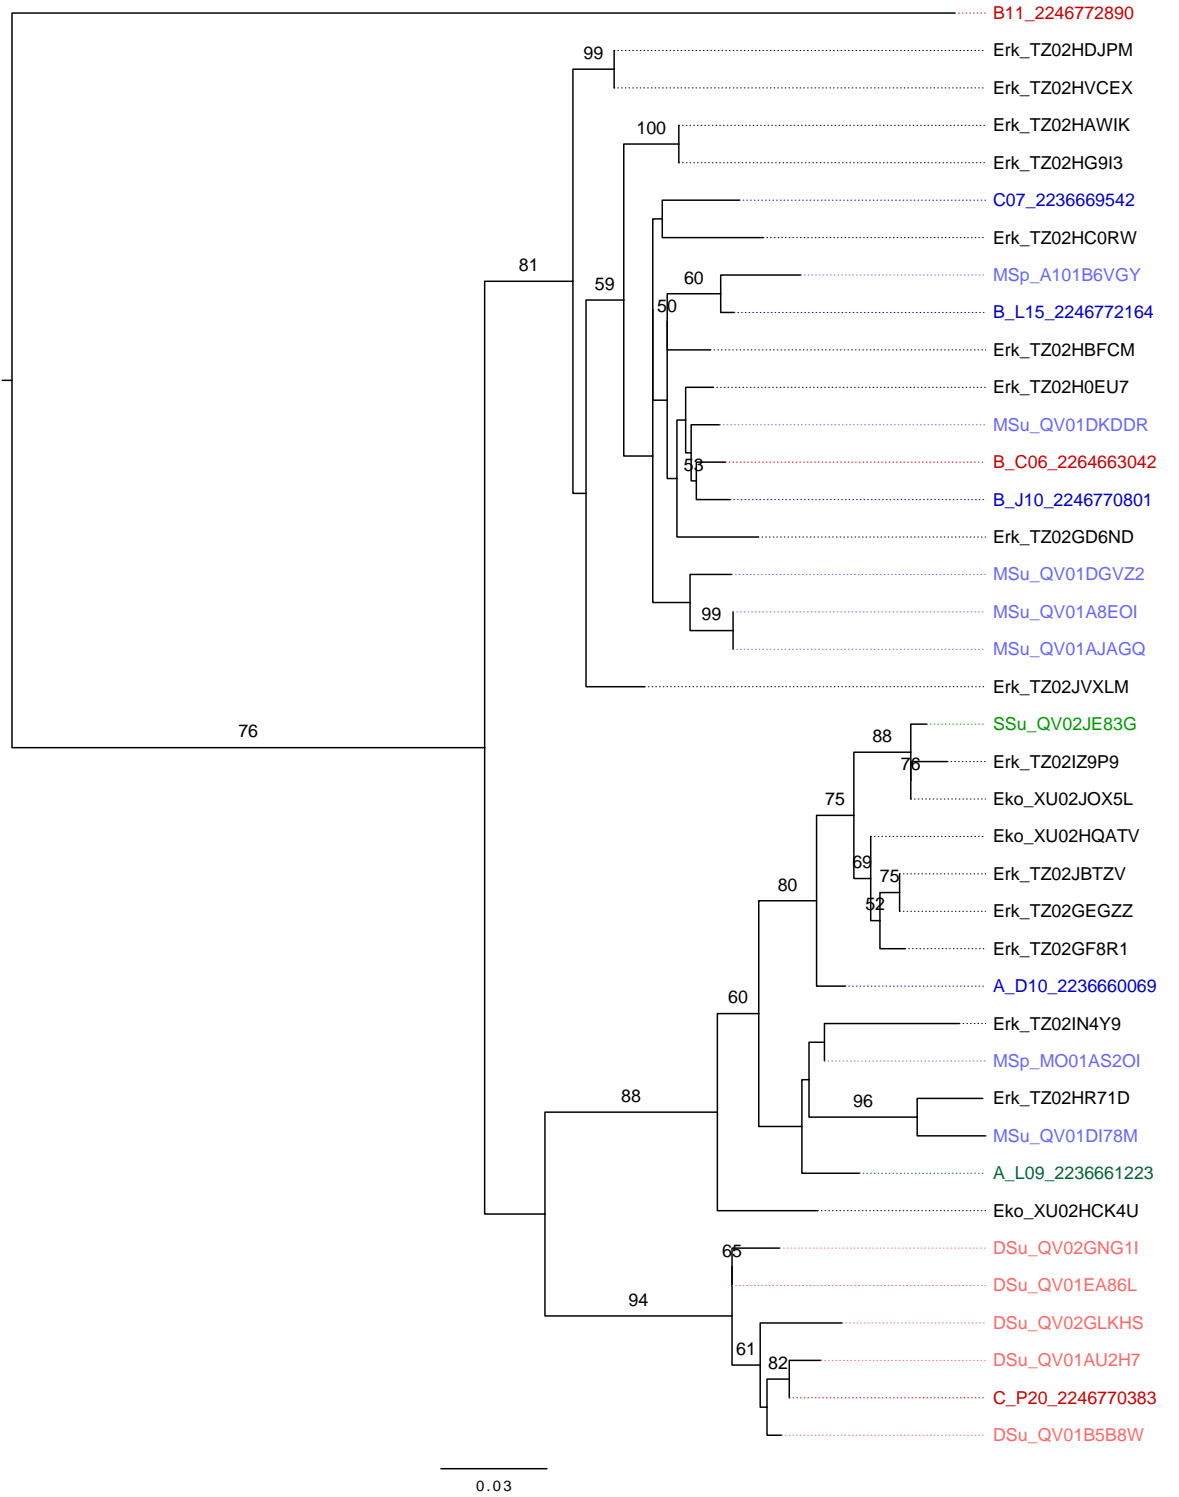

162 recJ

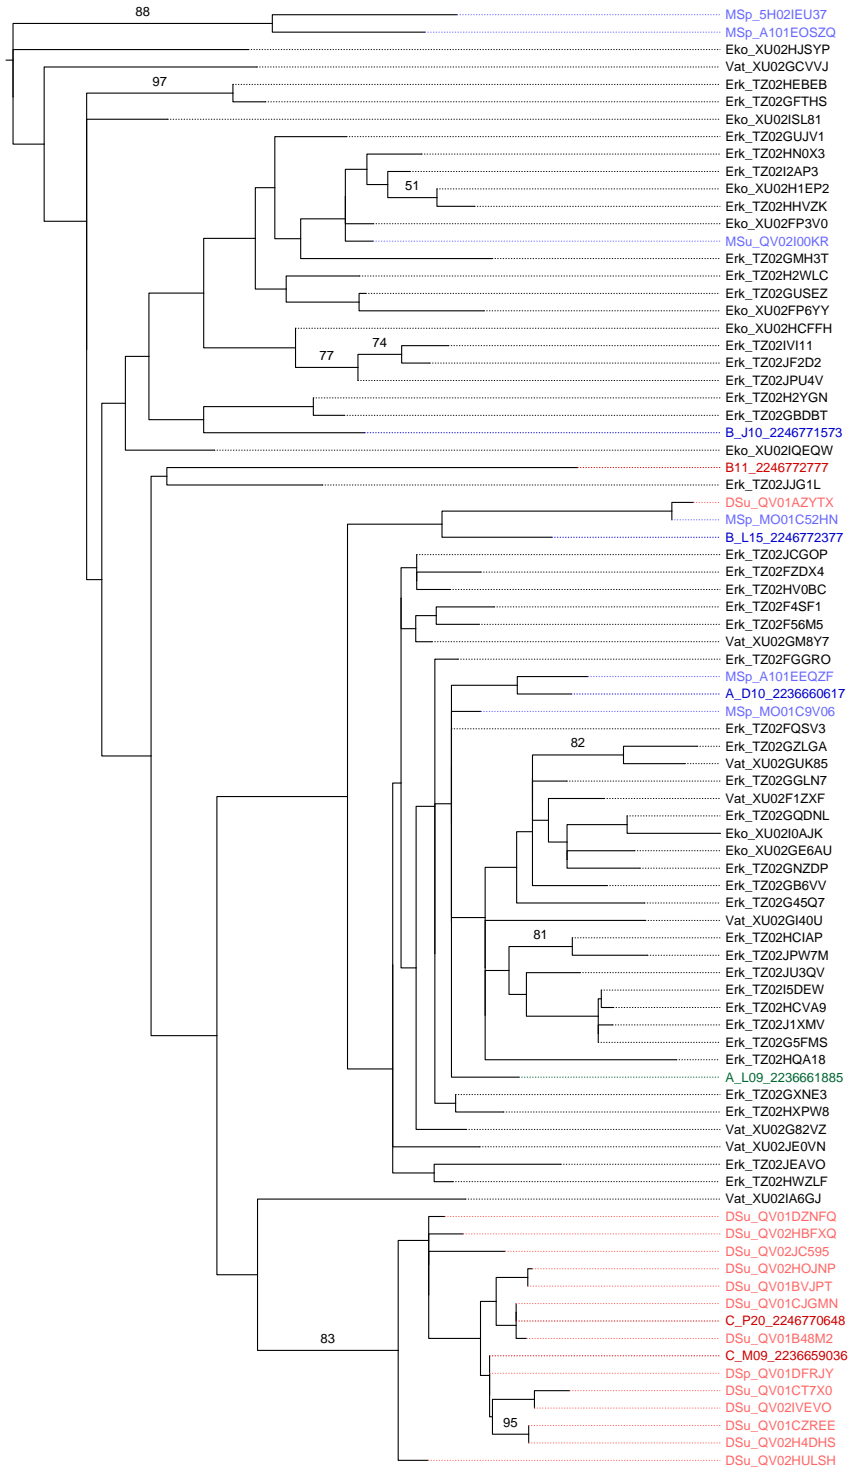

0.02







186 gcp

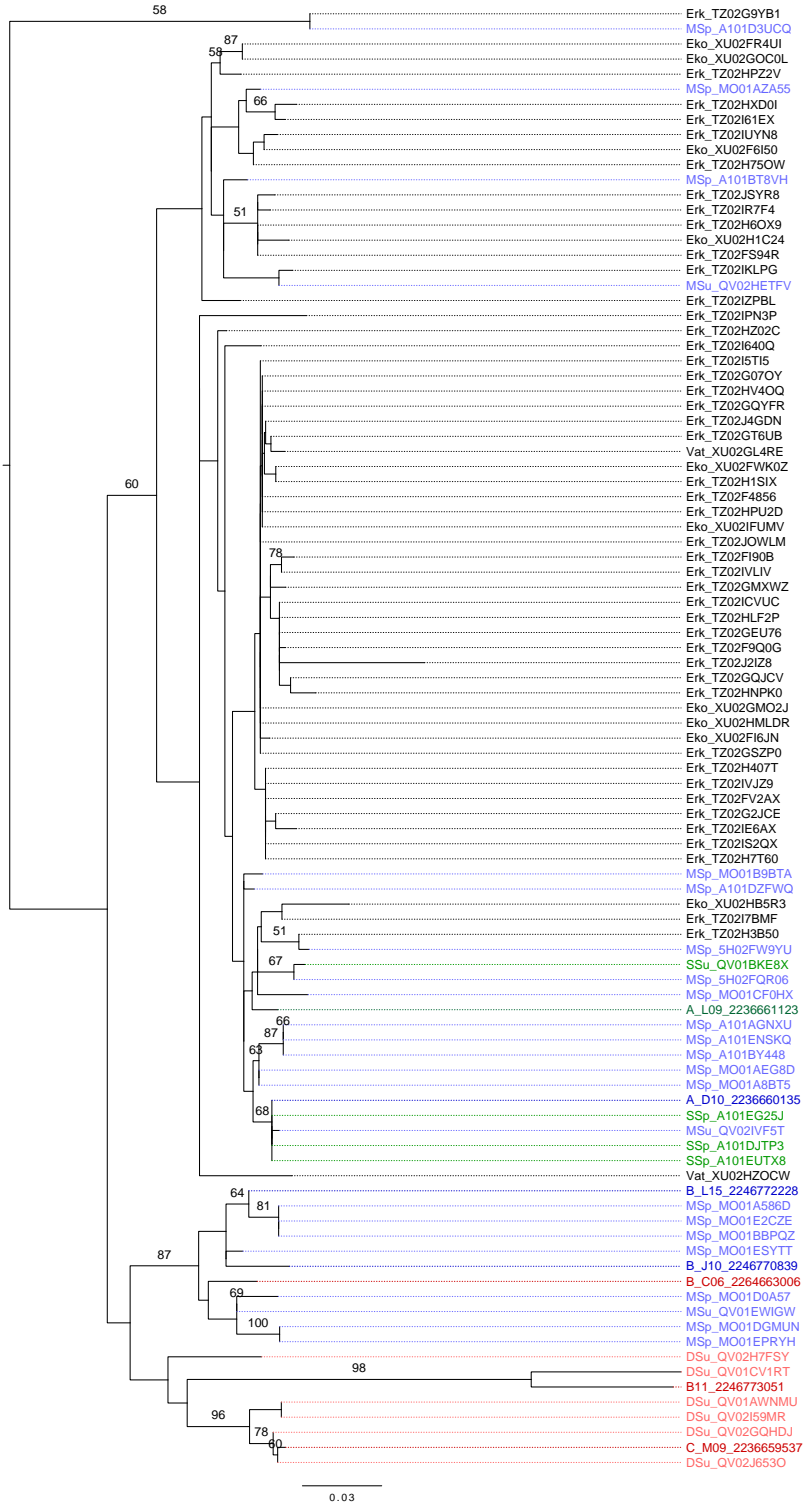

205 pheS

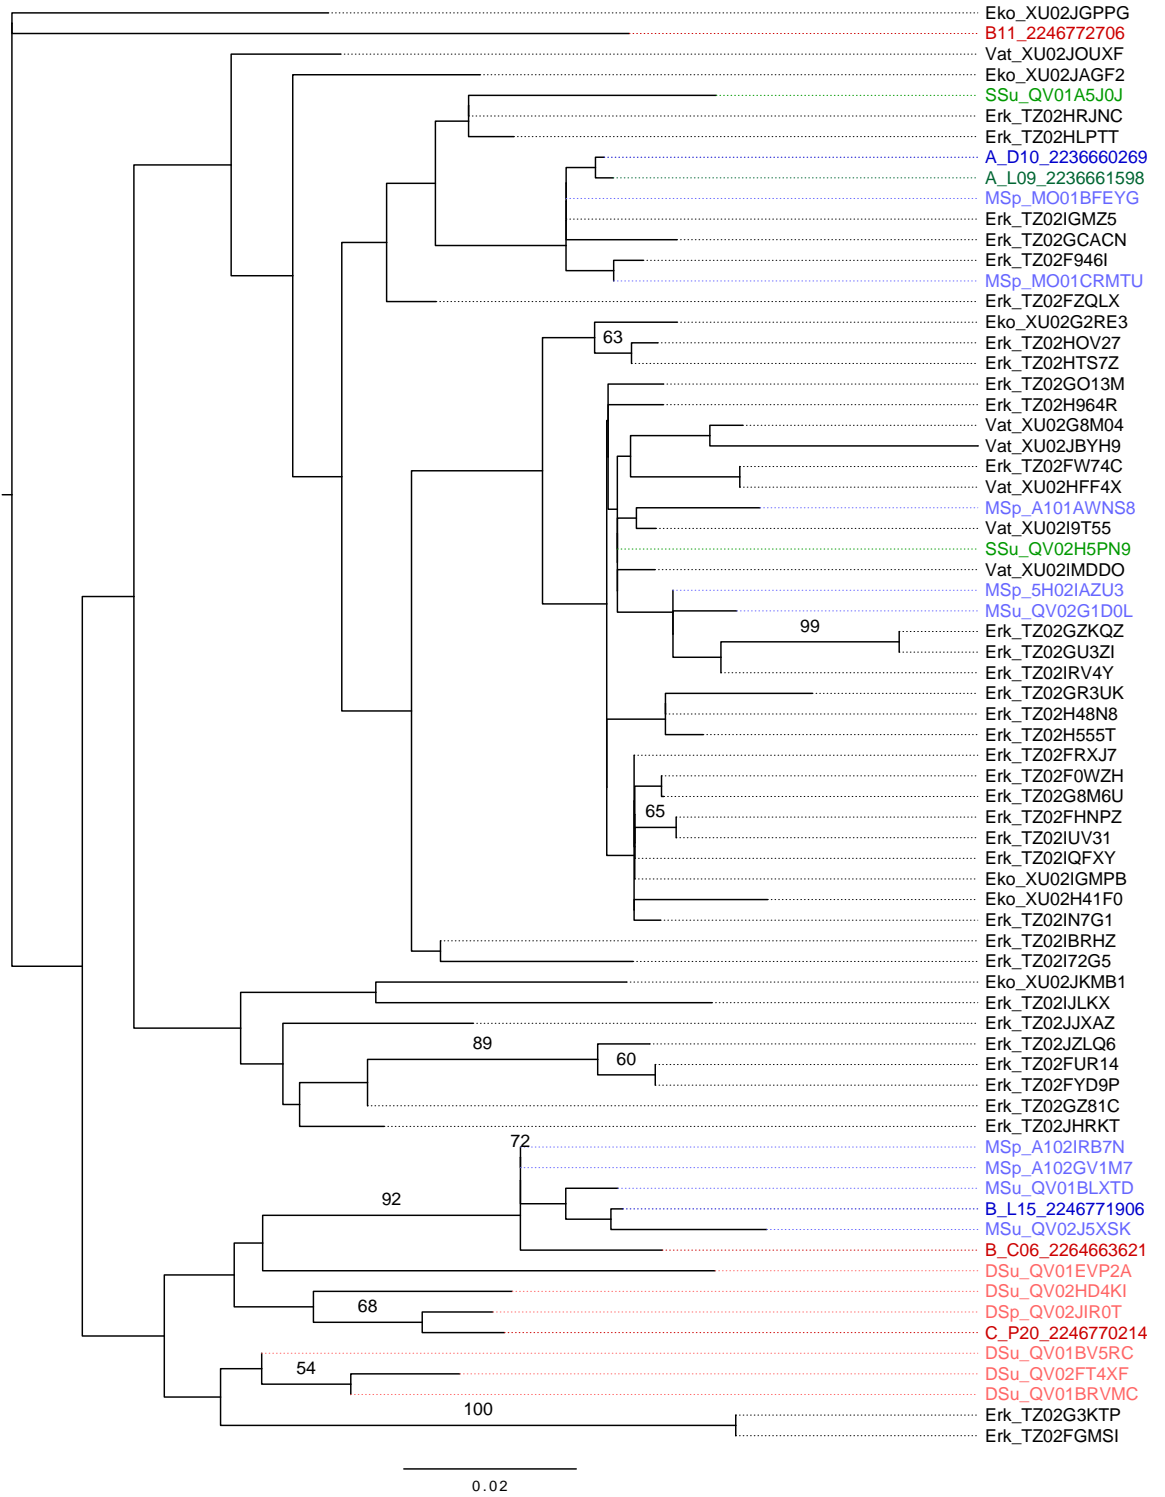

206 pheT

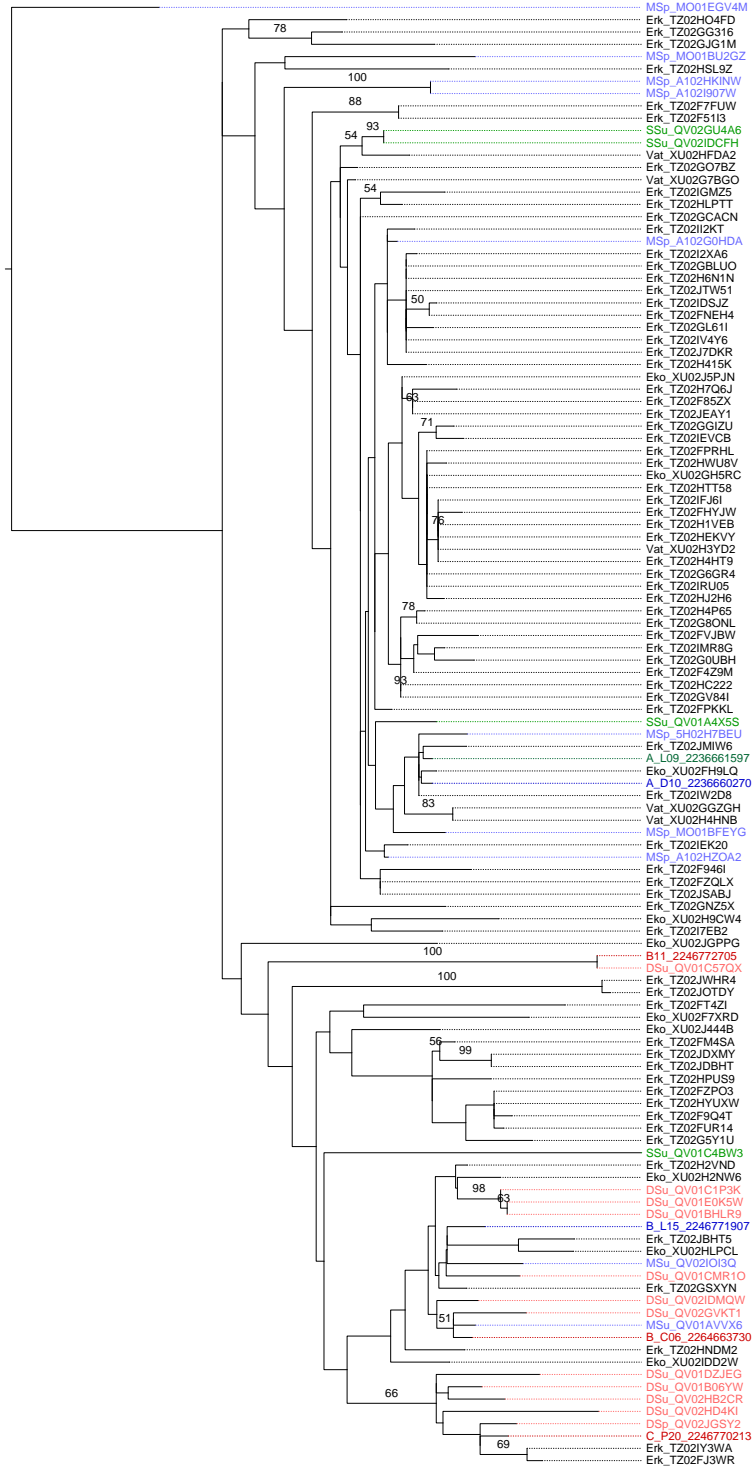

0.02

227 thrS

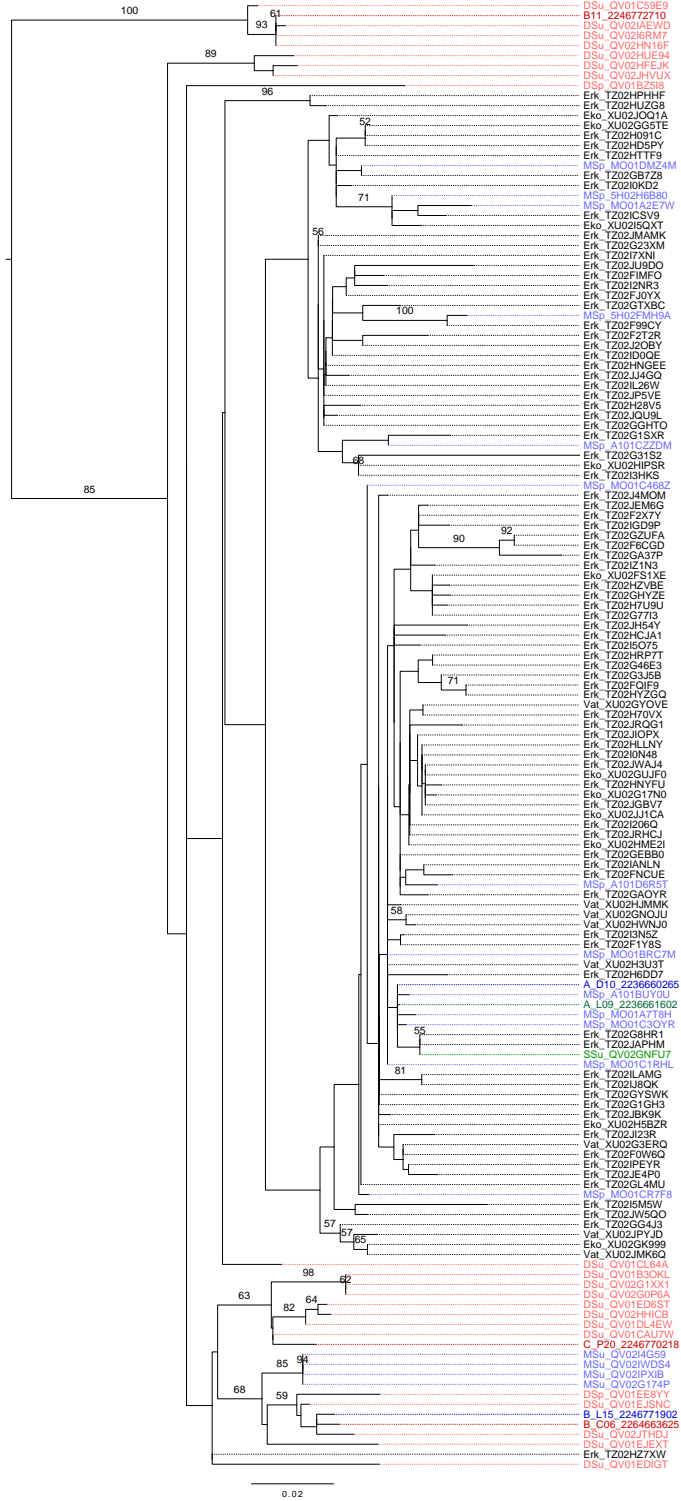

247 hemE

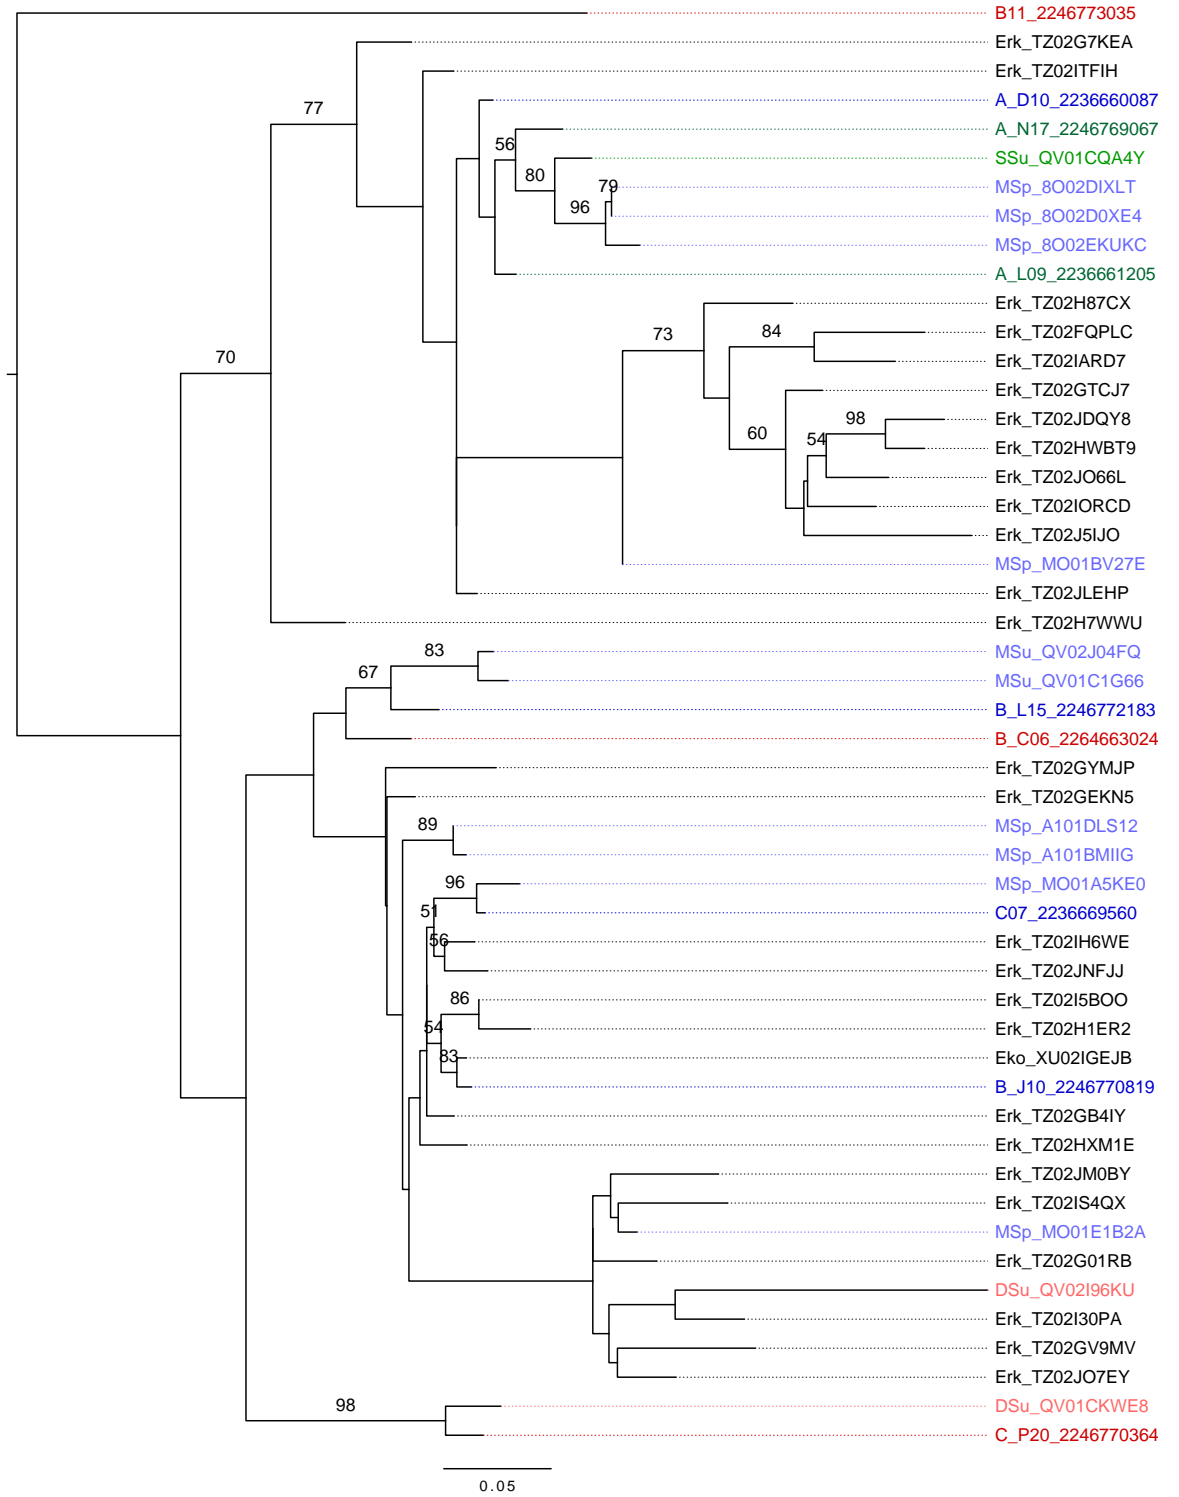

257 ubiB

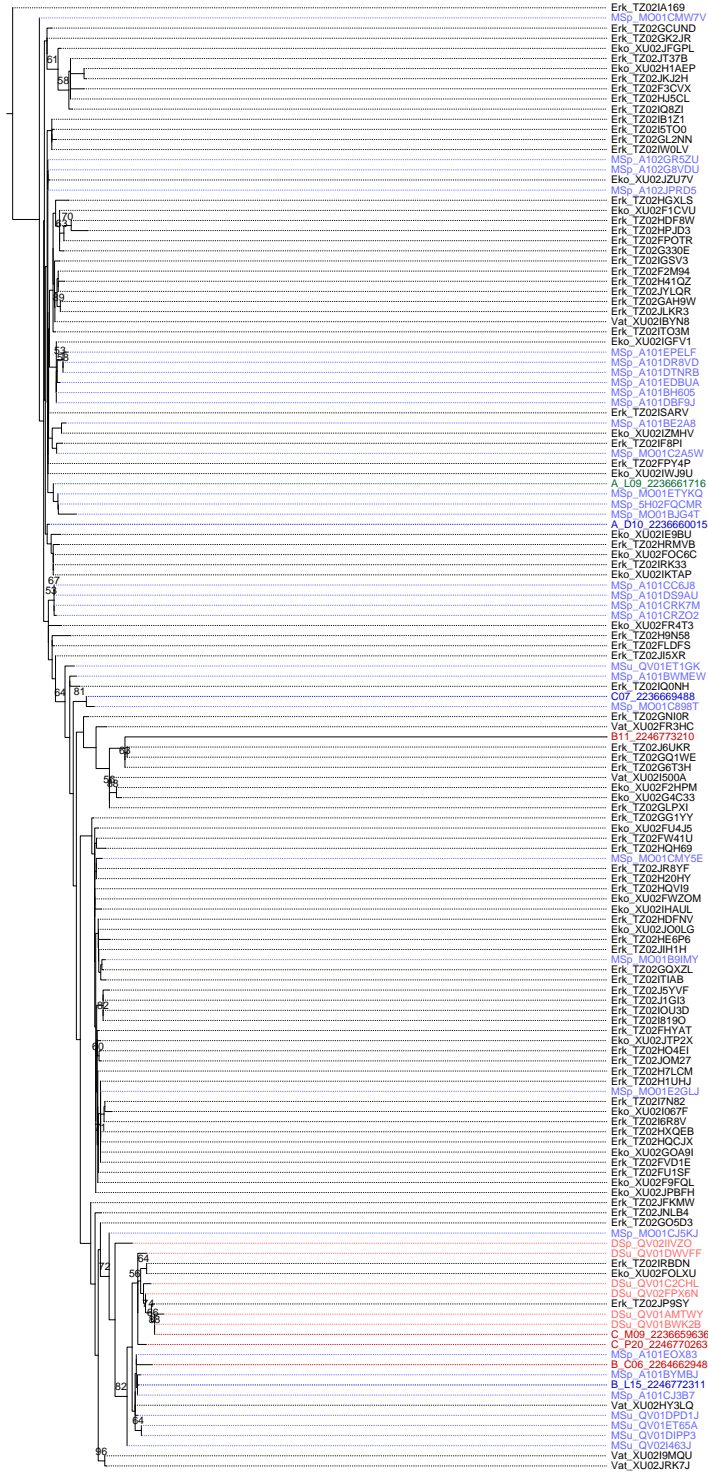

0.07

294 hemH

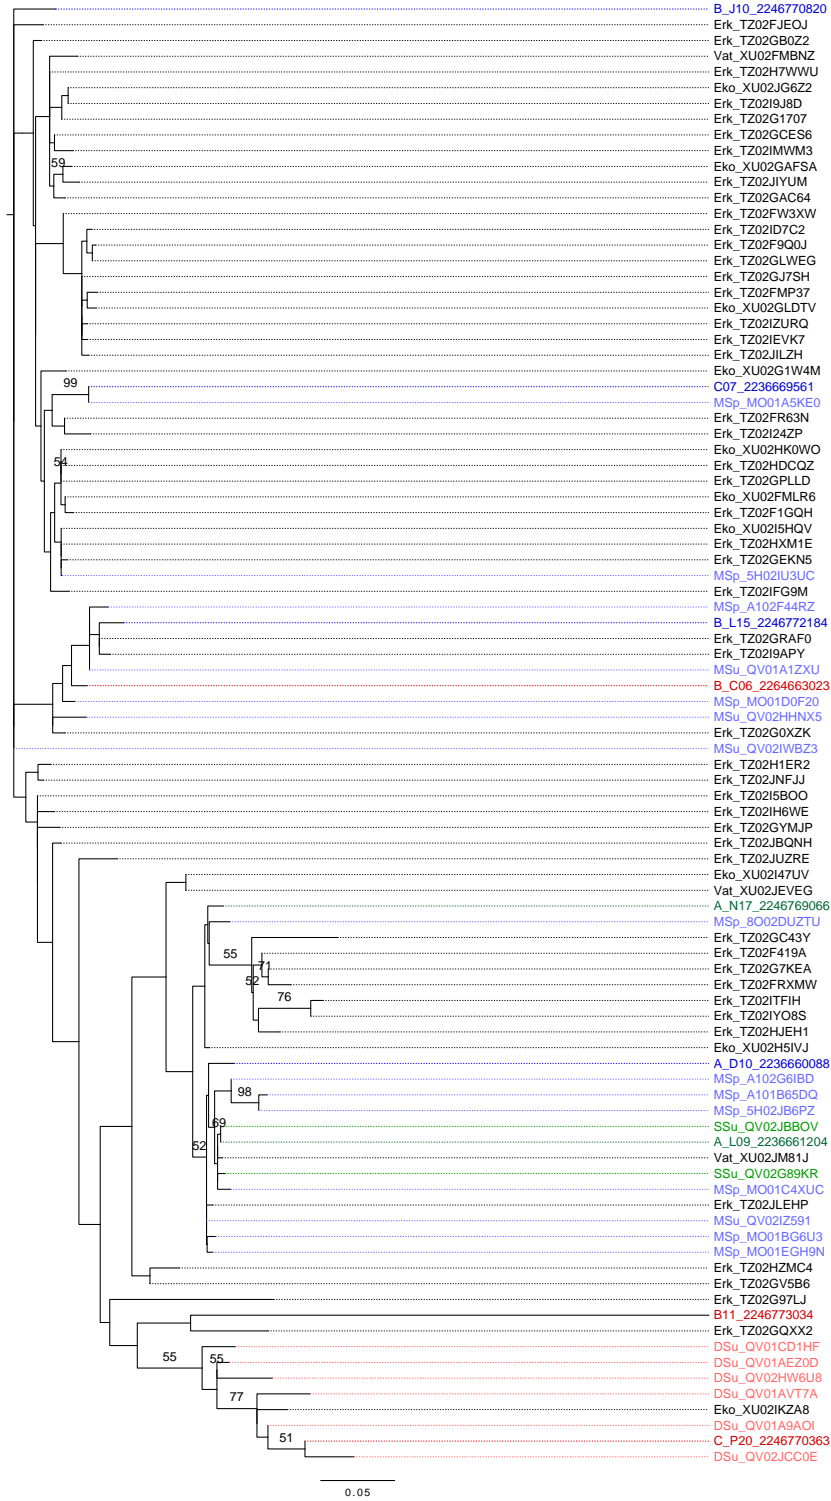



398 murC

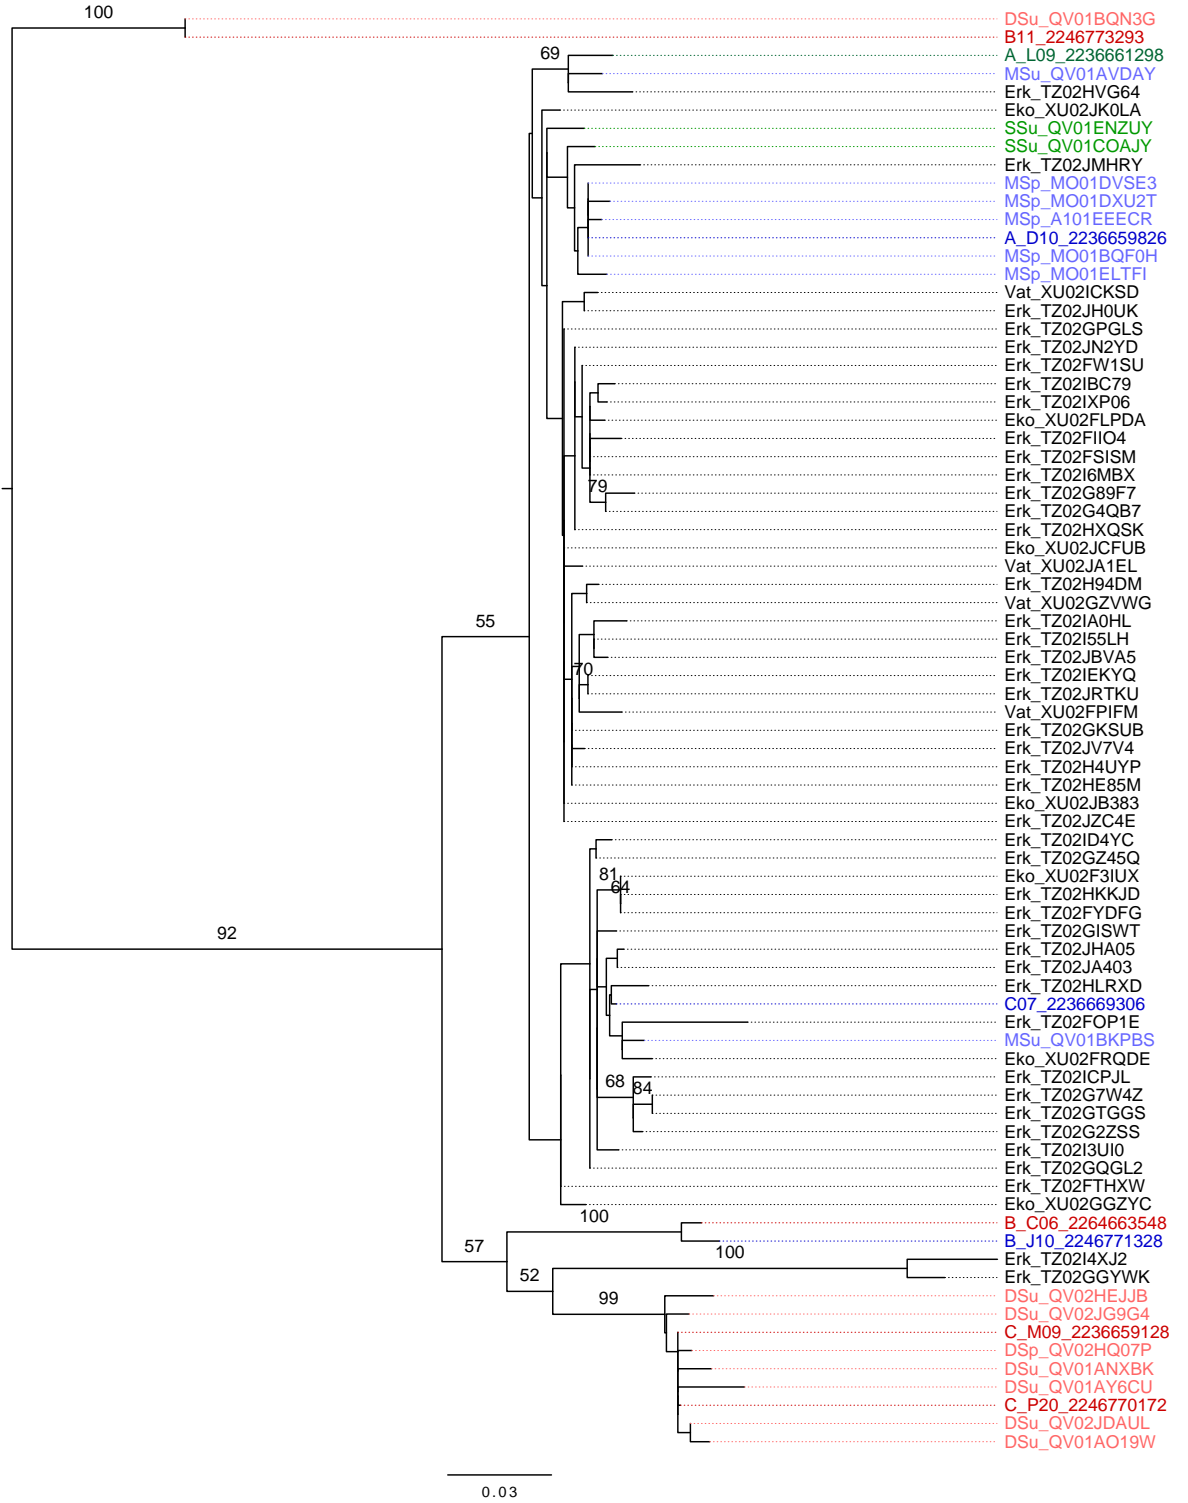





468 abcT2

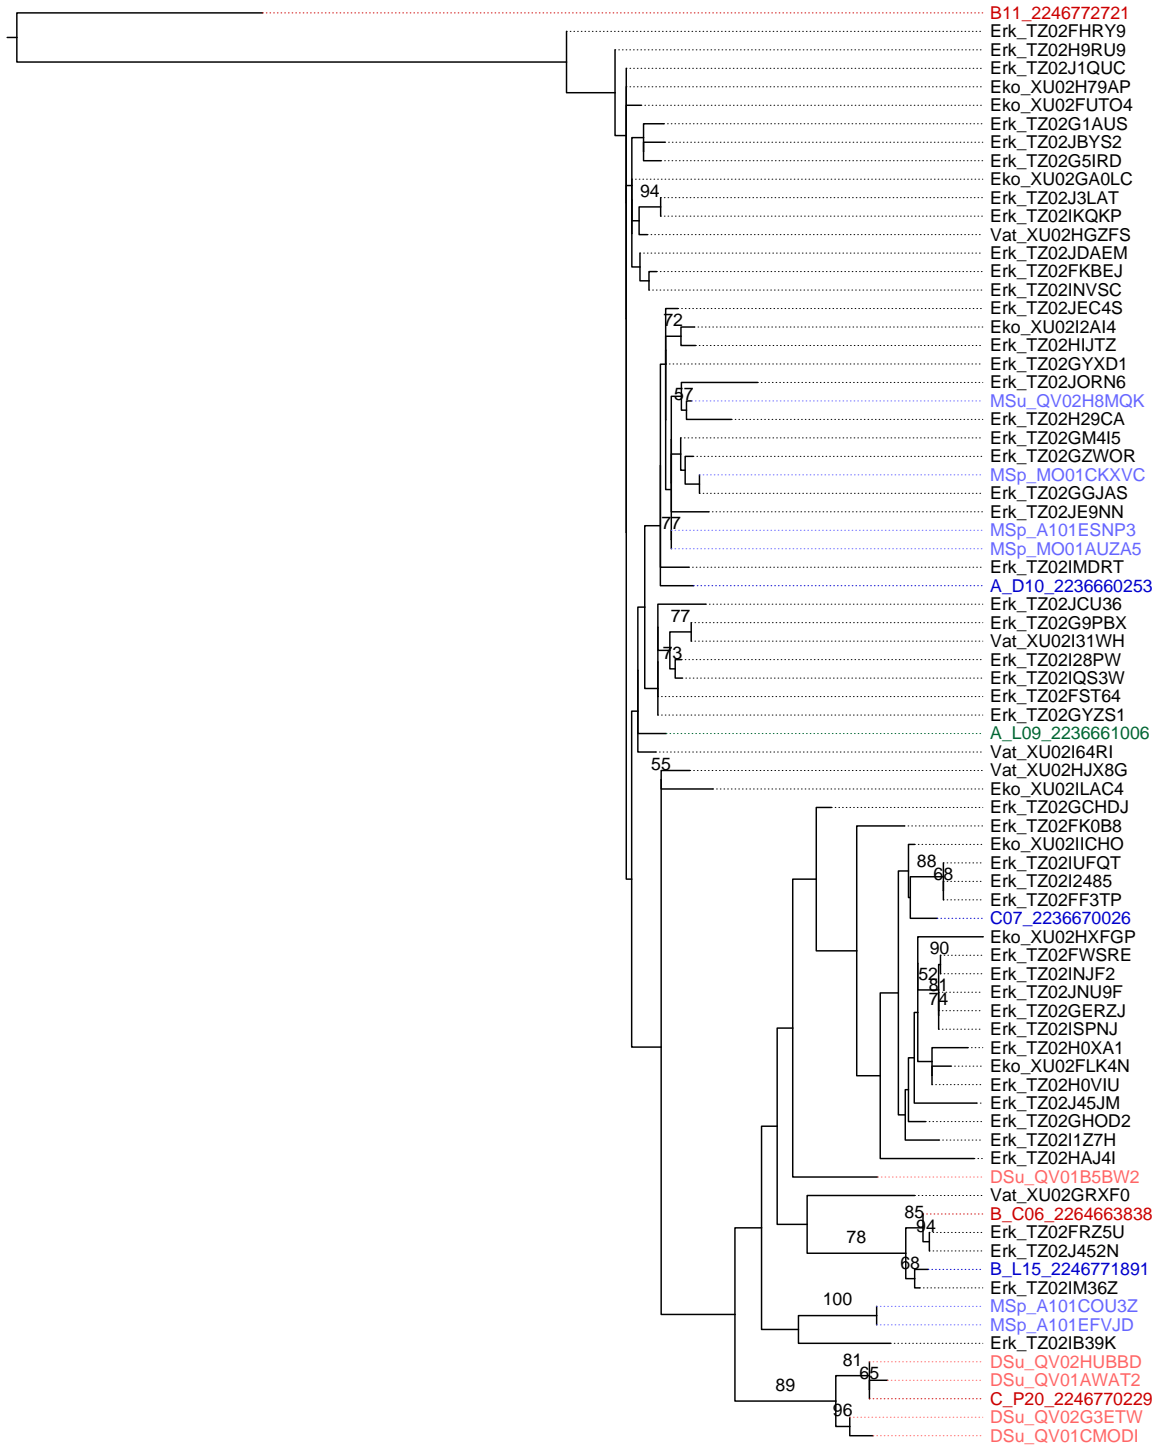

0.05

485 purA

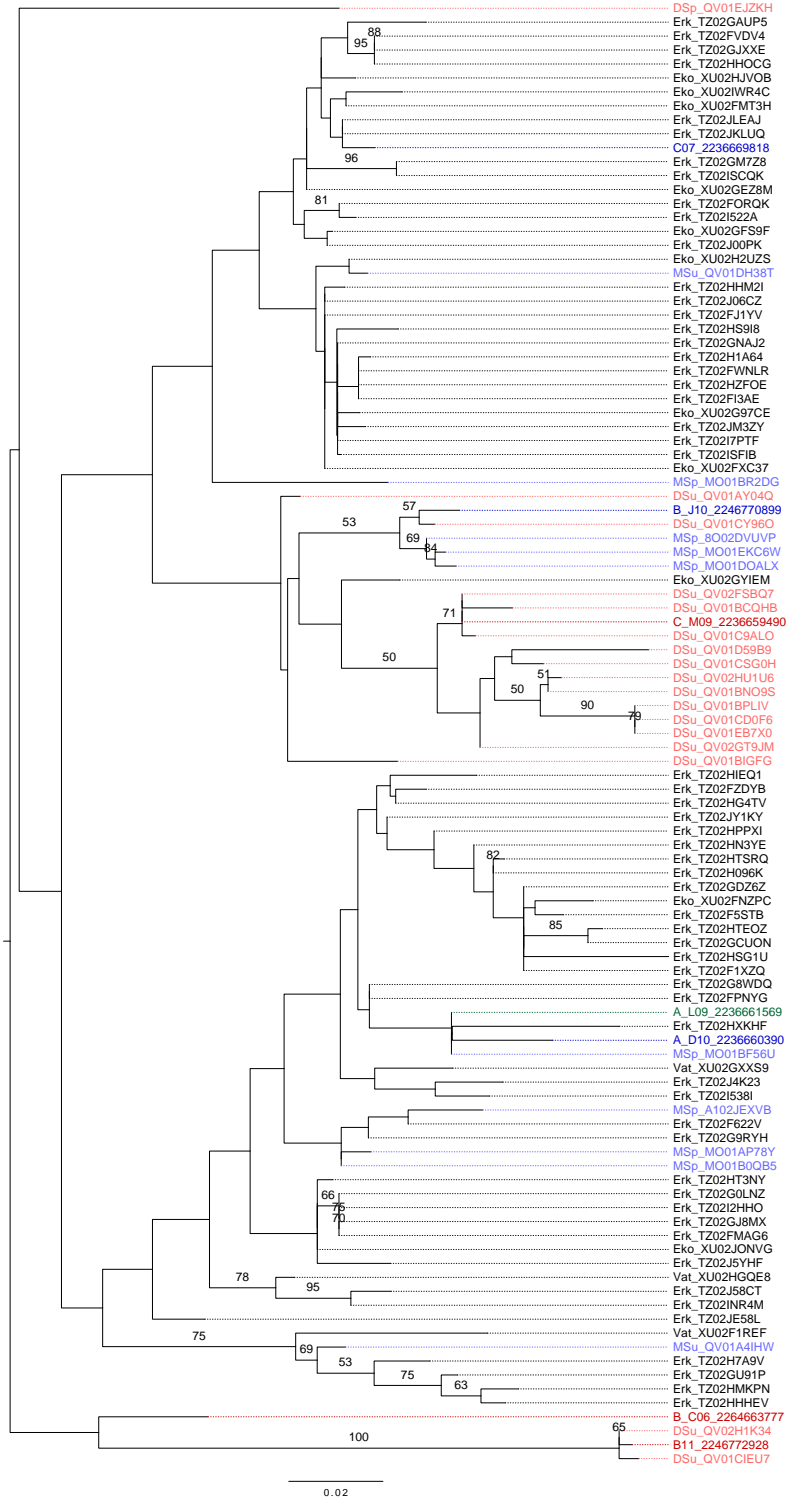

509 acsA

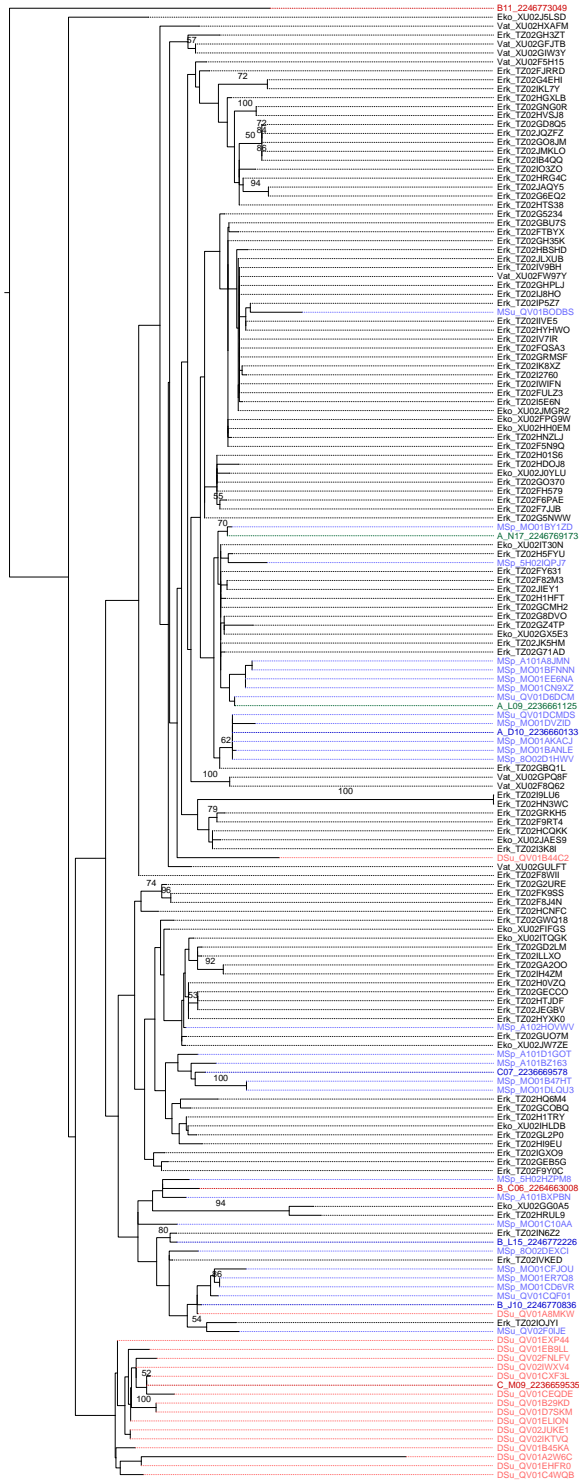

0.04

515 pmbA

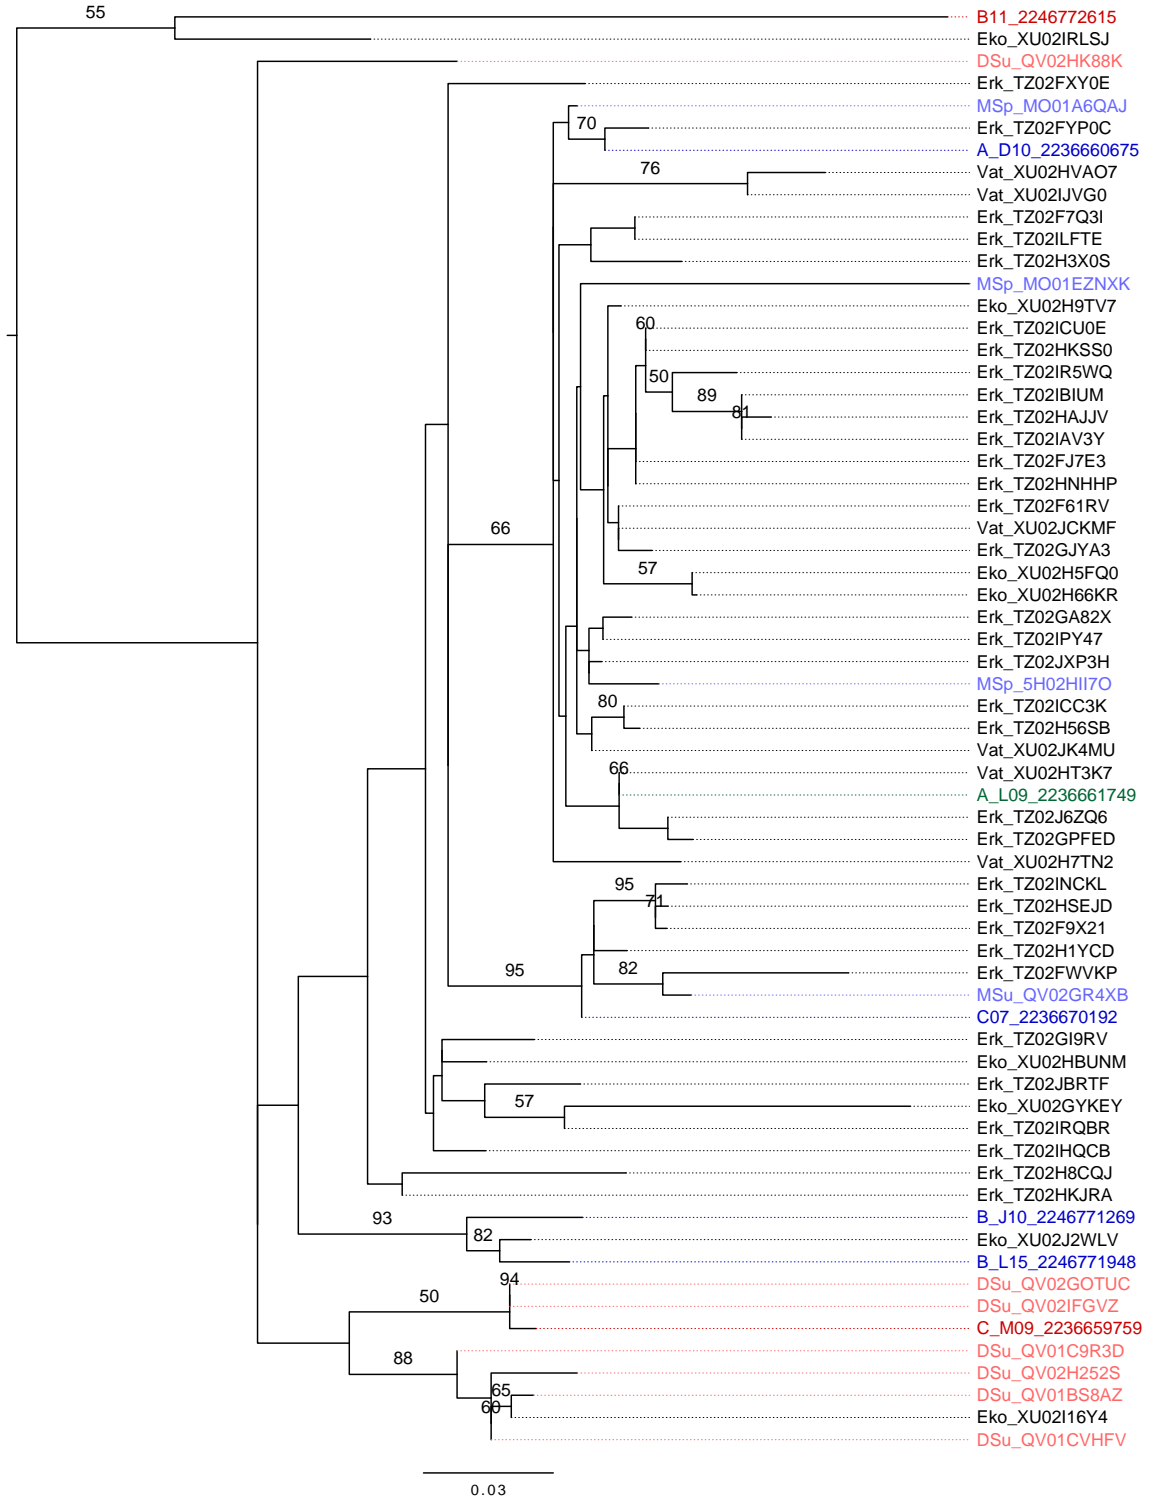

556 M dacF

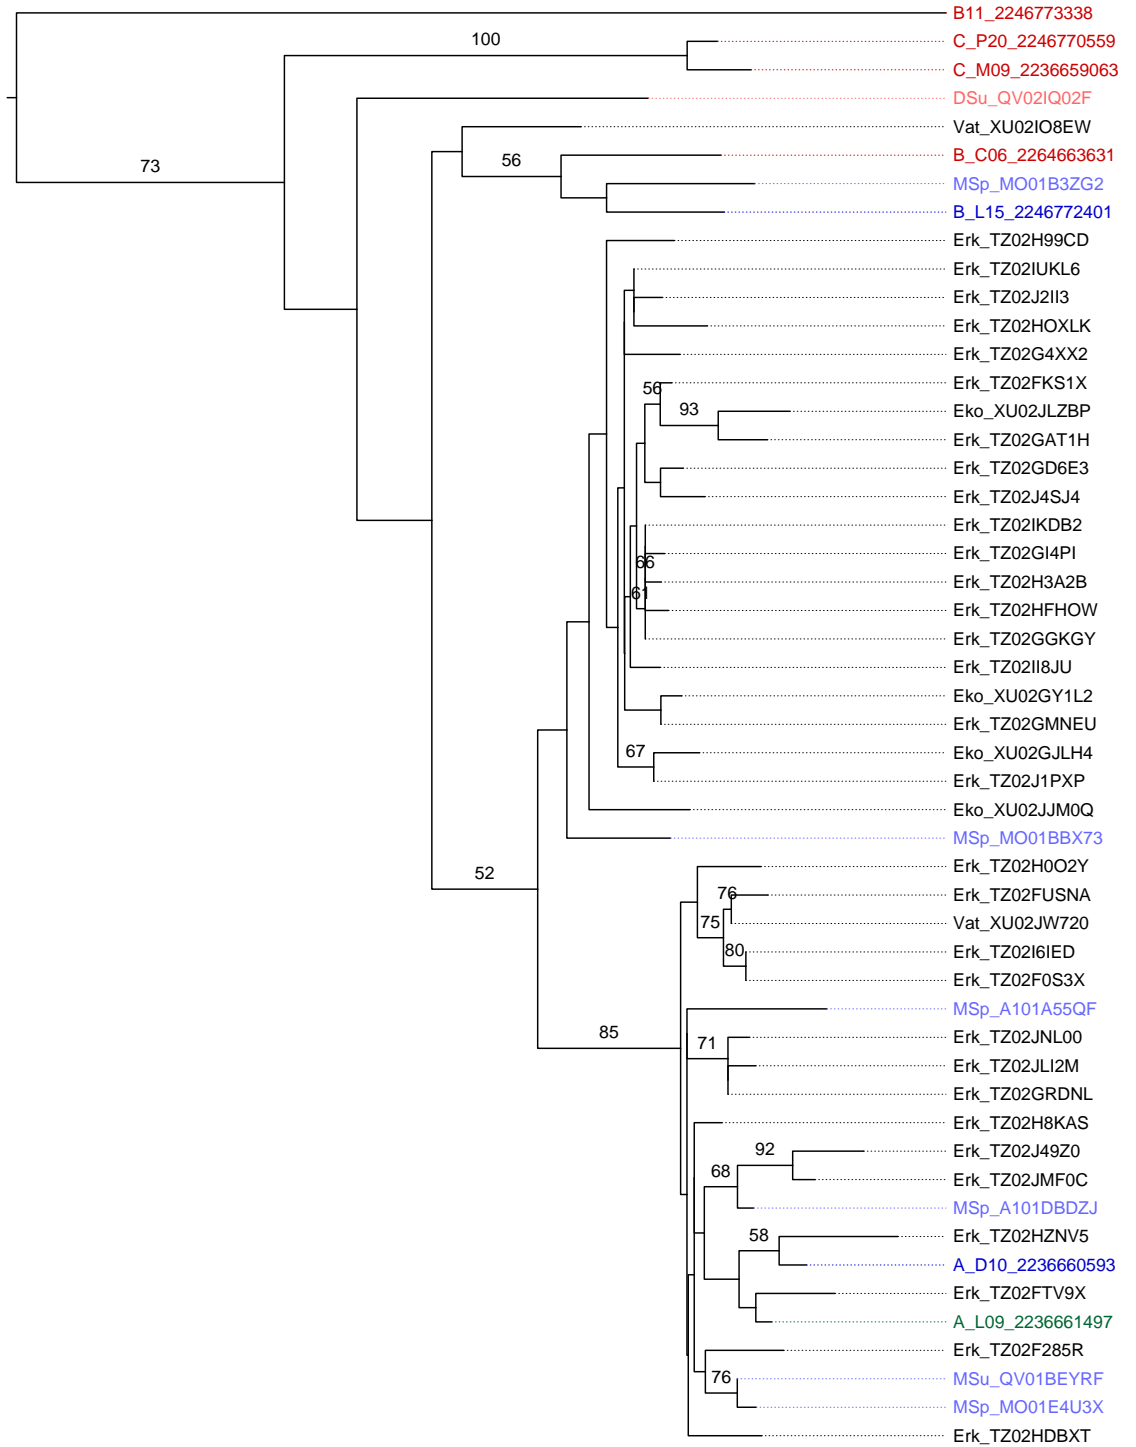

0.03



588 argG

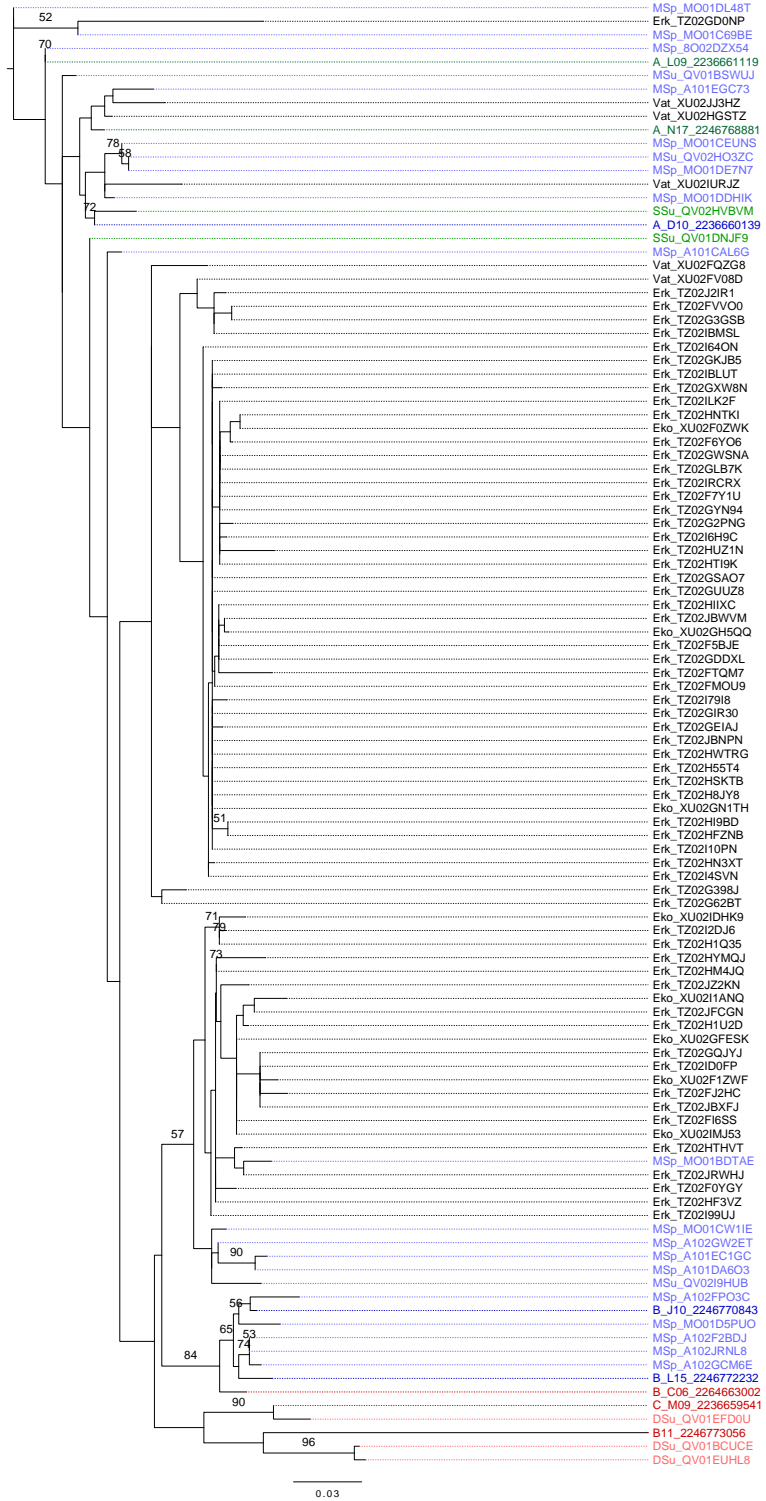

694 mutY

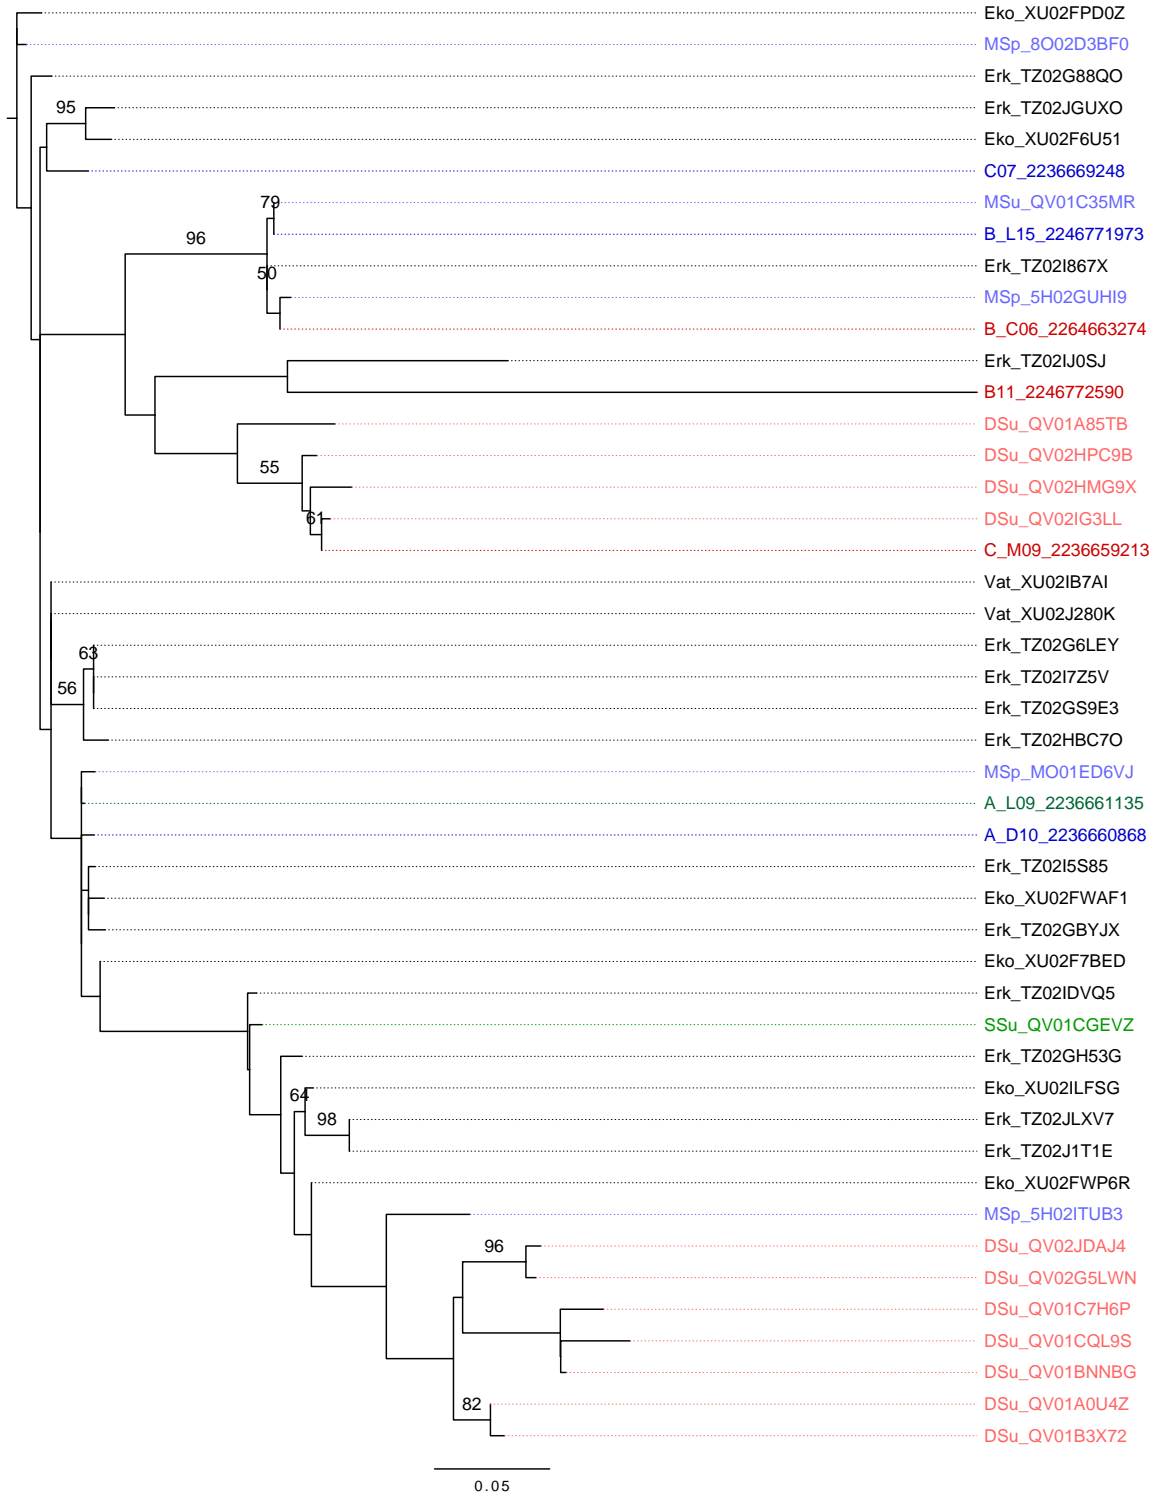

Supplement: gb-2013-14-11-r130-S3.pdf [file gb-2013-14-11-r130-S3.pdf]
